# Supplementary material
Source: PubMed Central journal article supplement (PMC2735501)

**Supporting Information For:**

**Potent Inhibitors of Pro-Inflammatory Cytokine Production Produced  
by a Marine-Derived Bacterium**

*Wendy K. Strangman<sup>1</sup>, Hak Cheol Kwon<sup>1</sup>, David Broide<sup>3</sup>, William Fenical<sup>1,2\*</sup>*

<sup>1</sup>Center for Marine Biotechnology and Biomedicine

Scripps Institution of Oceanography, University of California, San Diego

La Jolla, California 92093-0204 USA

<sup>2</sup> Skaggs School of Pharmacy and Pharmaceutical Sciences,

University of California, San Diego

La Jolla, California 92093-0204 USA

<sup>3</sup> Department of Medicine, University of California, San Diego

La Jolla, California 92093-0635 USA

\*Corresponding Author: [wfenical@ucsd.edu](mailto:wfenical@ucsd.edu)

## Table of Contents:

- S1.  $^1\text{H}$  NMR Spectrum for Splenocin A (1) in  $\text{CDCl}_3$ .
- S2. gCOSY for Splenocin A (1) in  $\text{CDCl}_3$ .
- S3. gHSQC for Splenocin A (1) in  $\text{CDCl}_3$ .
- S4. gHMBC for Splenocin A (1) in  $\text{CDCl}_3$ .
- S5. TOCSY for Splenocin A (1) in  $\text{CDCl}_3$ .
- S6. Splenocin A (1) UV spectrum in MeCN
- S7. HRMS for Splenocin A (1)
- S8. LCMS Trace for Splenocin A (1).
- S9.  $^1\text{H}$  NMR Spectrum for Splenocin B (2) in  $\text{CDCl}_3$ .
- S10.  $^{13}\text{C}$  NMR for Splenocin B (2) in  $\text{CDCl}_3$ .
- S11. gCOSY for Splenocin B (2) in  $\text{CDCl}_3$ .
- S12. gHSQC for Splenocin B (2) in  $\text{CDCl}_3$ .
- S13. gHMBC for Splenocin B (2) in  $\text{CDCl}_3$ .
- S14. Splenocin B (2) UV spectrum in MeCN
- S15. HRMS for Splenocin B (2)
- S16. LCMS Trace for Splenocin B (2).
- S17.  $^1\text{H}$  NMR Spectrum for Splenocin C (3) in  $\text{CDCl}_3$ .
- S18.  $^{13}\text{C}$  NMR for Splenocin C (3) in  $\text{CDCl}_3$ .
- S19. gCOSY for Splenocin C (3) in  $\text{CDCl}_3$ .
- S20. gHSQC for Splenocin C (3) in  $\text{CDCl}_3$ .
- S21. gHMBC for Splenocin C (3) in  $\text{CDCl}_3$ .
- S22. Splenocin C (3) UV spectrum in MeCN
- S23. HRMS for Splenocin C (3).
- S24. LCMS Trace for Splenocin C (3).
- S25.  $^1\text{H}$  NMR Spectrum for Splenocin D (4) in  $\text{CDCl}_3$ .
- S26. gCOSY for Splenocin D (4) in  $\text{CDCl}_3$ .
- S27. gHSQC for Splenocin D (4) in  $\text{CDCl}_3$ .
- S28. gHMBC for Splenocin D (4) in  $\text{CDCl}_3$ .
- S29. Splenocin D (4) UV spectrum in MeCN
- S30. HRMS for Splenocin D (4).
- S31. LCMS Trace for Splenocin D (4).
- S32.  $^1\text{H}$  NMR Spectrum for Splenocin E (5) in  $\text{CDCl}_3$ .
- S33.  $^{13}\text{C}$  NMR for Splenocin E (5) in  $\text{CDCl}_3$ .
- S34. gCOSY for Splenocin E (5) in  $\text{CDCl}_3$ .
- S35. NOESY for Splenocin E (5) in  $\text{CDCl}_3$ .
- S36. gHSQC for Splenocin E (5) in  $\text{CDCl}_3$ .
- S37. gHMBC for Splenocin E (5) in  $\text{CDCl}_3$ .
- S38. Splenocin E (5) UV spectrum in MeCN
- S39. LCMS Trace for Splenocin E (5).
- S40. HRMS for Splenocin E (5).
- S41.  $^1\text{H}$  NMR Spectrum for Splenocin F (6) in  $\text{CDCl}_3$ .
- S42. gCOSY for Splenocin F (6) in  $\text{CDCl}_3$ .
- S43. gHSQC for Splenocin F (6) in  $\text{CDCl}_3$ .
- S44. HRMS for Splenocin F (6)

- S45. Splenocin F (**6**) UV spectrum in MeCN
- S46. LCMS Trace for Splenocin F (**6**).
- S47. <sup>1</sup>H NMR Spectrum for Splenocin G (**7**) in CDCl<sub>3</sub>.
- S48. <sup>13</sup>C NMR for Splenocin G (**7**) in CDCl<sub>3</sub>.
- S49. gCOSY for Splenocin G (**7**) in CDCl<sub>3</sub>.
- S50. gHSQC for Splenocin G (**7**) in CDCl<sub>3</sub>.
- S51. gHMBC for Splenocin G (**7**) in CDCl<sub>3</sub>.
- S52. HRMS for Splenocin G (**7**).
- S53. Splenocin G (**7**) UV spectrum in MeCN
- S54. LCMS Trace for Splenocin G (**7**).
- S55. <sup>1</sup>H NMR Spectrum for Splenocin H (**8**) in CDCl<sub>3</sub>.
- S56. gCOSY for Splenocin H (**8**) in CDCl<sub>3</sub>
- S57. gHSQC for Splenocin H (**8**) in CDCl<sub>3</sub>.
- S58. gHMBC for Splenocin H (**8**) in CDCl<sub>3</sub>.
- S59. HRMS for Splenocin H (**8**).
- S60. LCMS Trace for Splenocin H (**8**).
- S61. <sup>1</sup>H NMR Spectrum for Splenocin I (**9**) in CDCl<sub>3</sub>.
- S62. <sup>13</sup>C NMR for Splenocin I (**9**) in CDCl<sub>3</sub>.
- S63. gCOSY for Splenocin I (**9**) in CDCl<sub>3</sub>
- S64. gHSQC for Splenocin I (**9**) in CDCl<sub>3</sub>.
- S65. gHMBC for Splenocin I (**9**) in CDCl<sub>3</sub>.
- S66. Splenocin I (**9**) UV spectrum in MeCN.
- S67. LCMS Trace for Splenocin I (**9**).
- S68. HRMS for Splenocin I (**9**).
- S69. <sup>1</sup>H NMR Spectrum for Splenocin J (**10**) in CDCl<sub>3</sub>.
- S70. <sup>13</sup>C NMR for Splenocin J (**10**) in CDCl<sub>3</sub>.
- S71. gCOSY for Splenocin J (**10**) in CDCl<sub>3</sub>
- S72. NOESY spectrum for Splenocin J (**10**) in CDCl<sub>3</sub>.
- S73. gHSQC for Splenocin J (**10**) in CDCl<sub>3</sub>.
- S74. gHMBC for Splenocin J (**10**) in CDCl<sub>3</sub>.
- S75. IR spectrum for Splenocin J (**10**).
- S76. Splenocin J (**10**) UV spectrum in MeCN
- S77. LCMS Trace for Splenocin J (**10**).
- S78. HRMS for Splenocin J (**10**).
- S79. <sup>1</sup>H NMR Chemical Shift Data for Di-Mosher and Tri-Mosher Products of Splenocin J (**10**) in CDCl<sub>3</sub>.
- S80. CD Spectra for Splenocins A-J (**1-10**) and 8-hydroxy antimycin in CH<sub>3</sub>CN.

S1.  $^1\text{H}$  NMR Spectrum for Splenocin A (1) in  $\text{CDCl}_3$ .

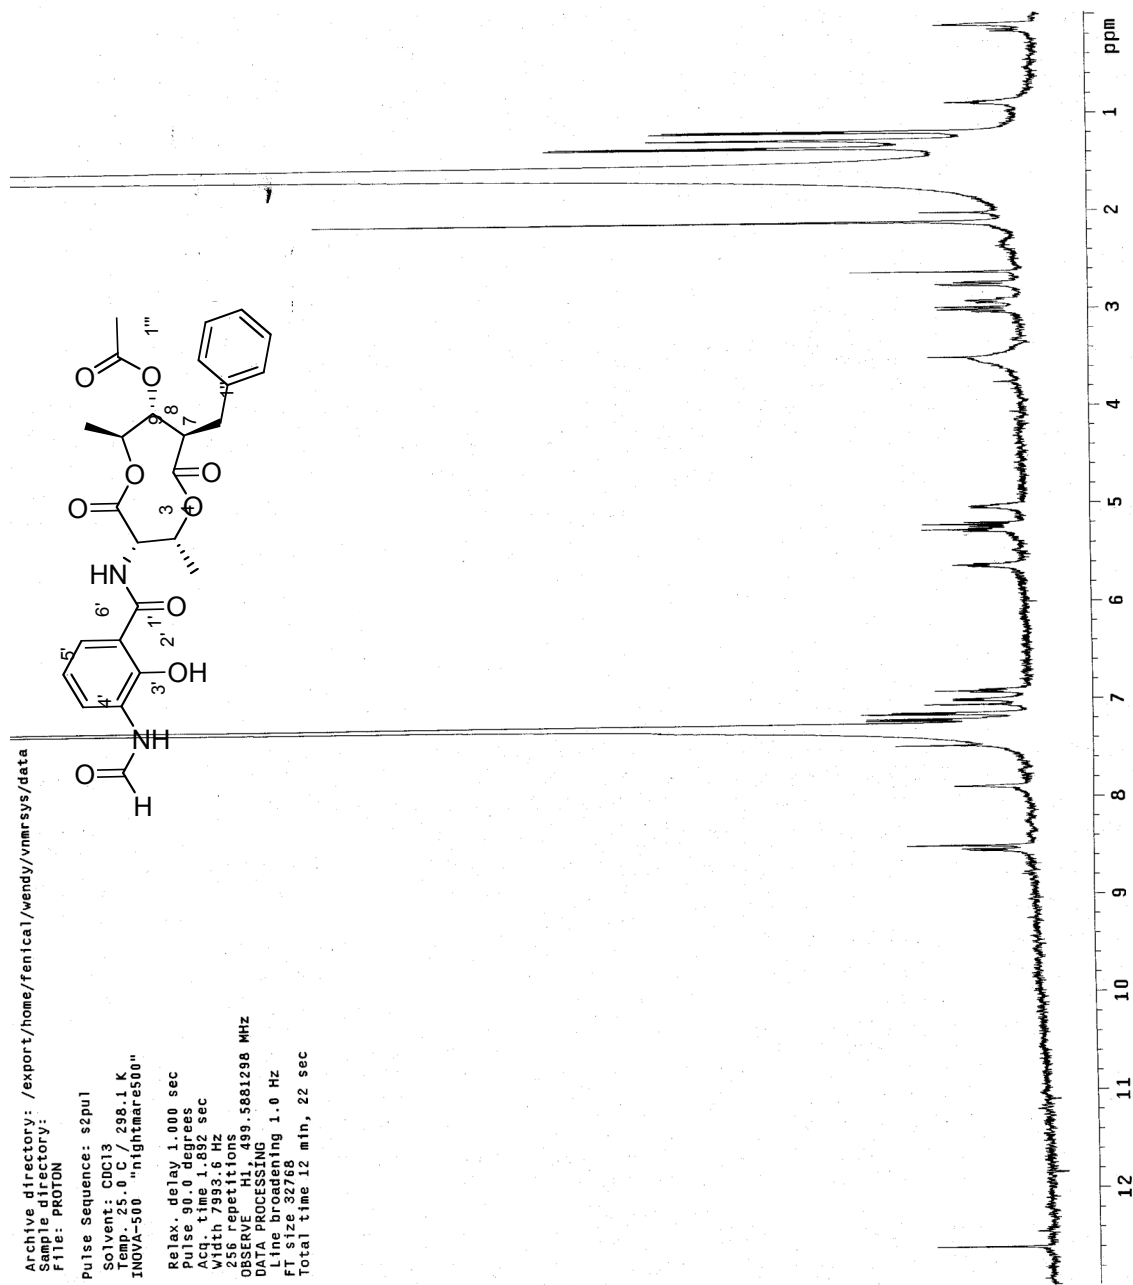

S2. gCOSY for Splenocin A (1) in CDCl<sub>3</sub>.

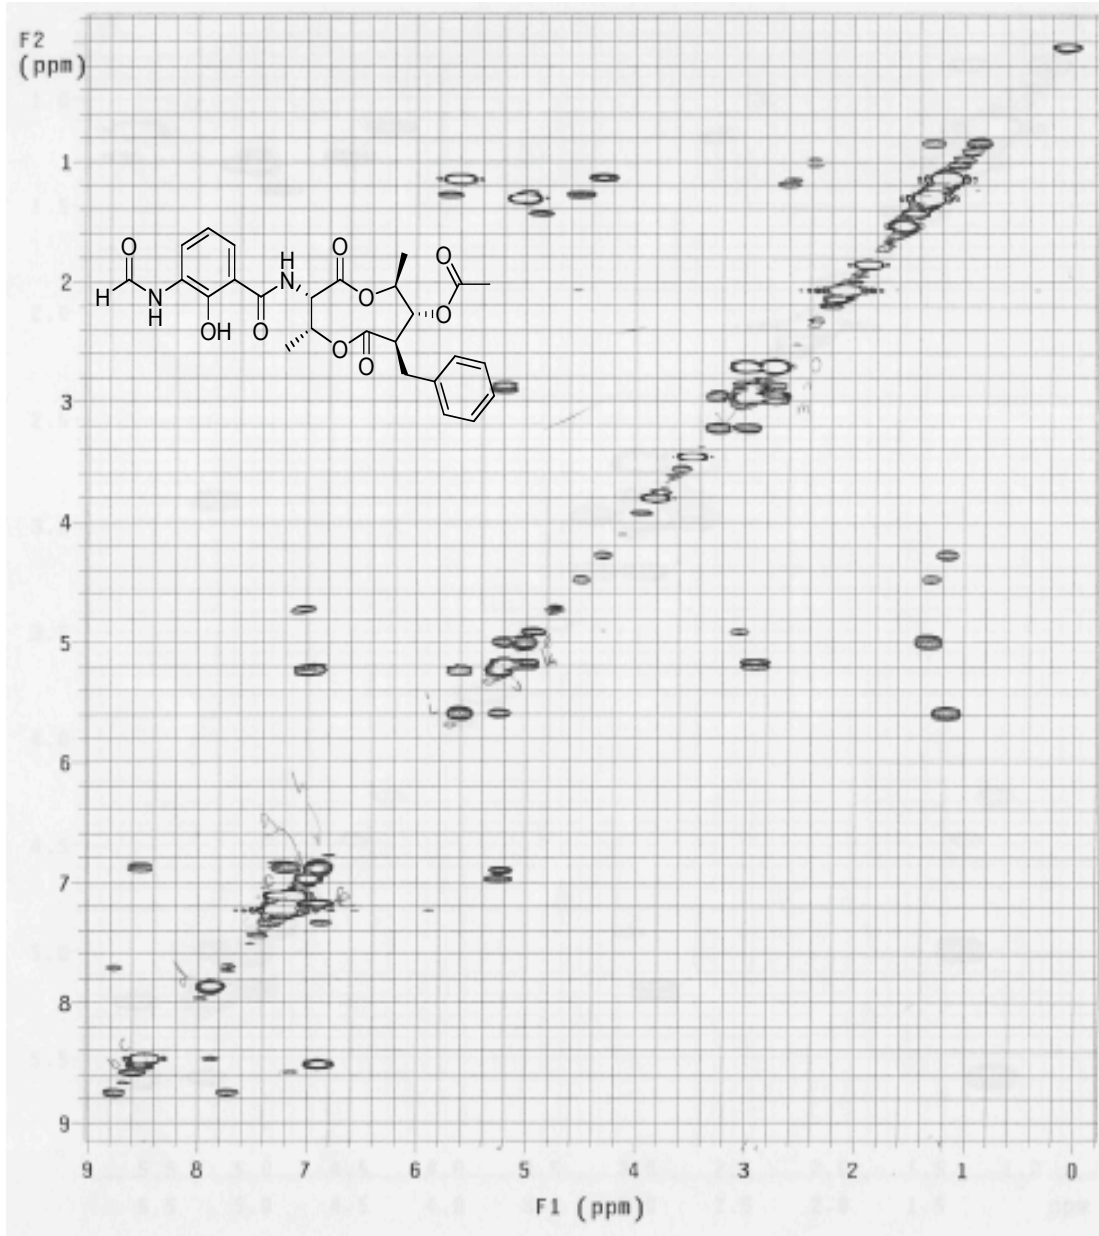

S3. gHSQC for Splenocin A (1) in CDCl<sub>3</sub>.

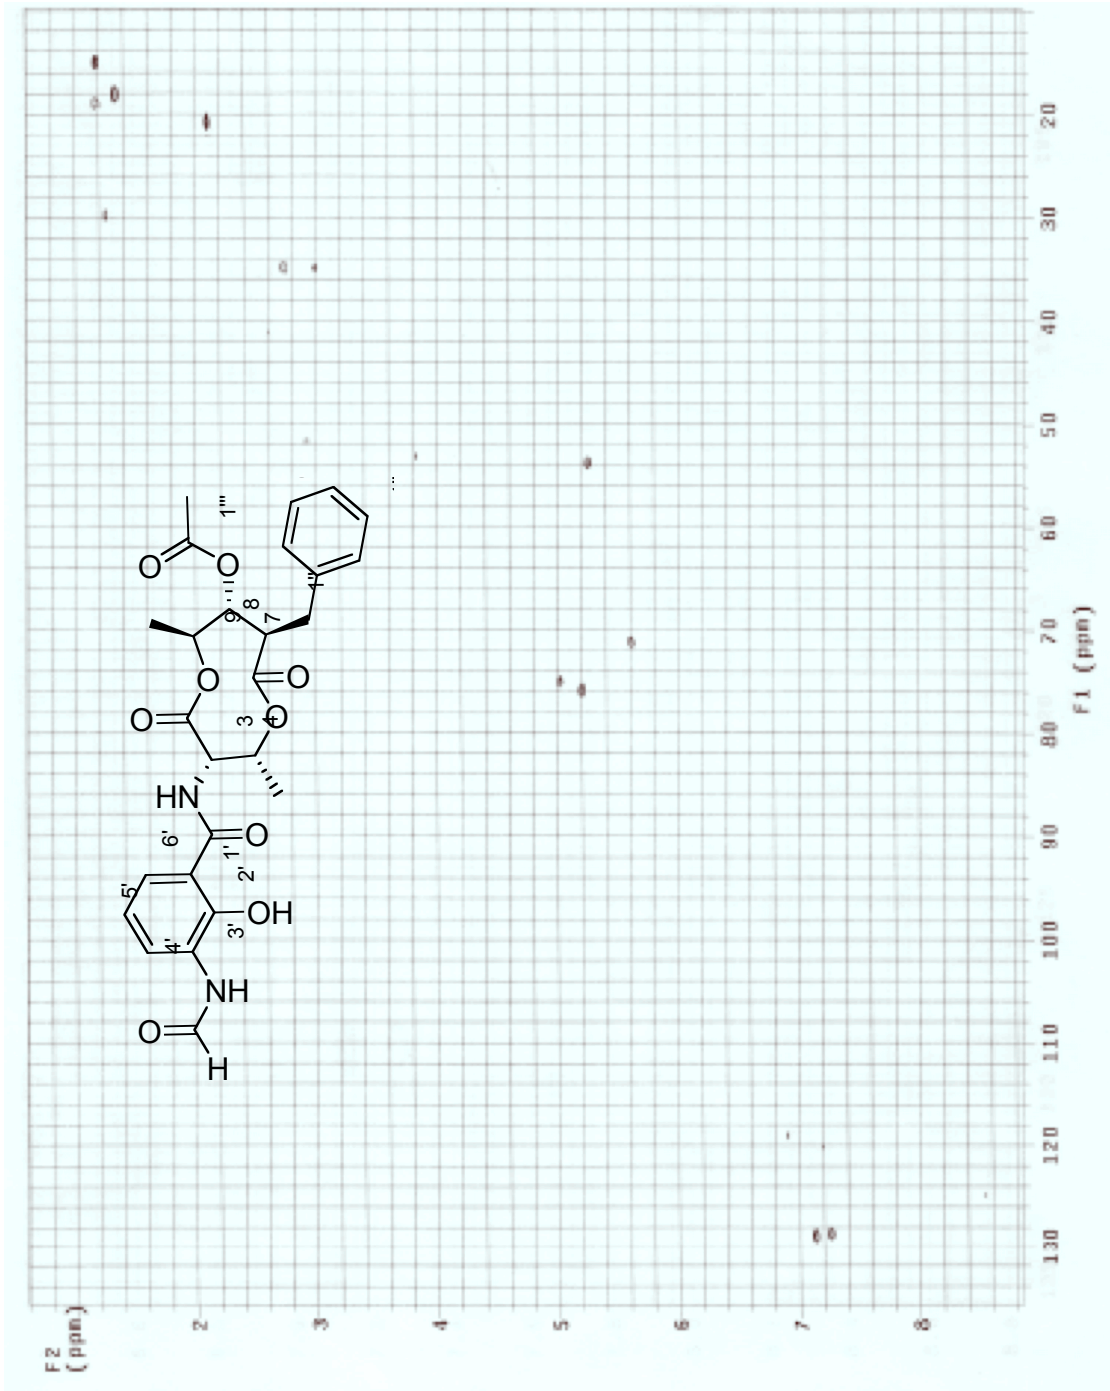

S4. gHMBC for Splenocin A (1) in CDCl<sub>3</sub>.

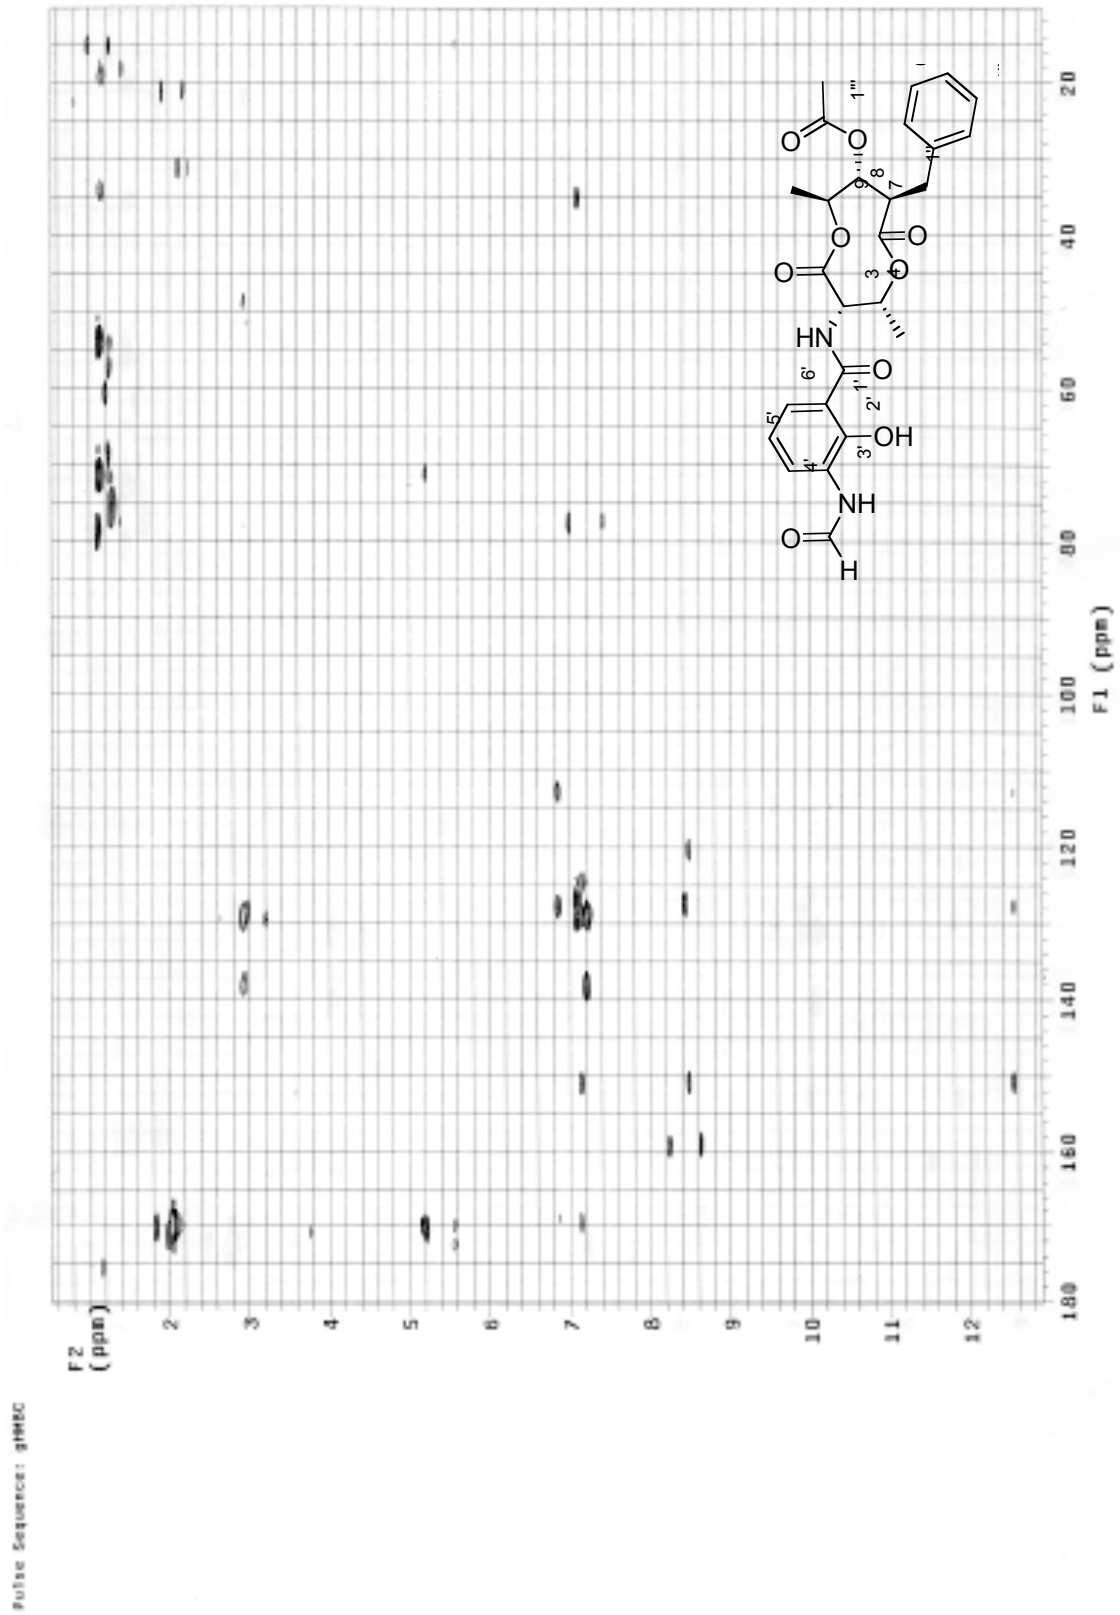

S5. TOCSY for Splenocin A (1) in CDCl<sub>3</sub>.

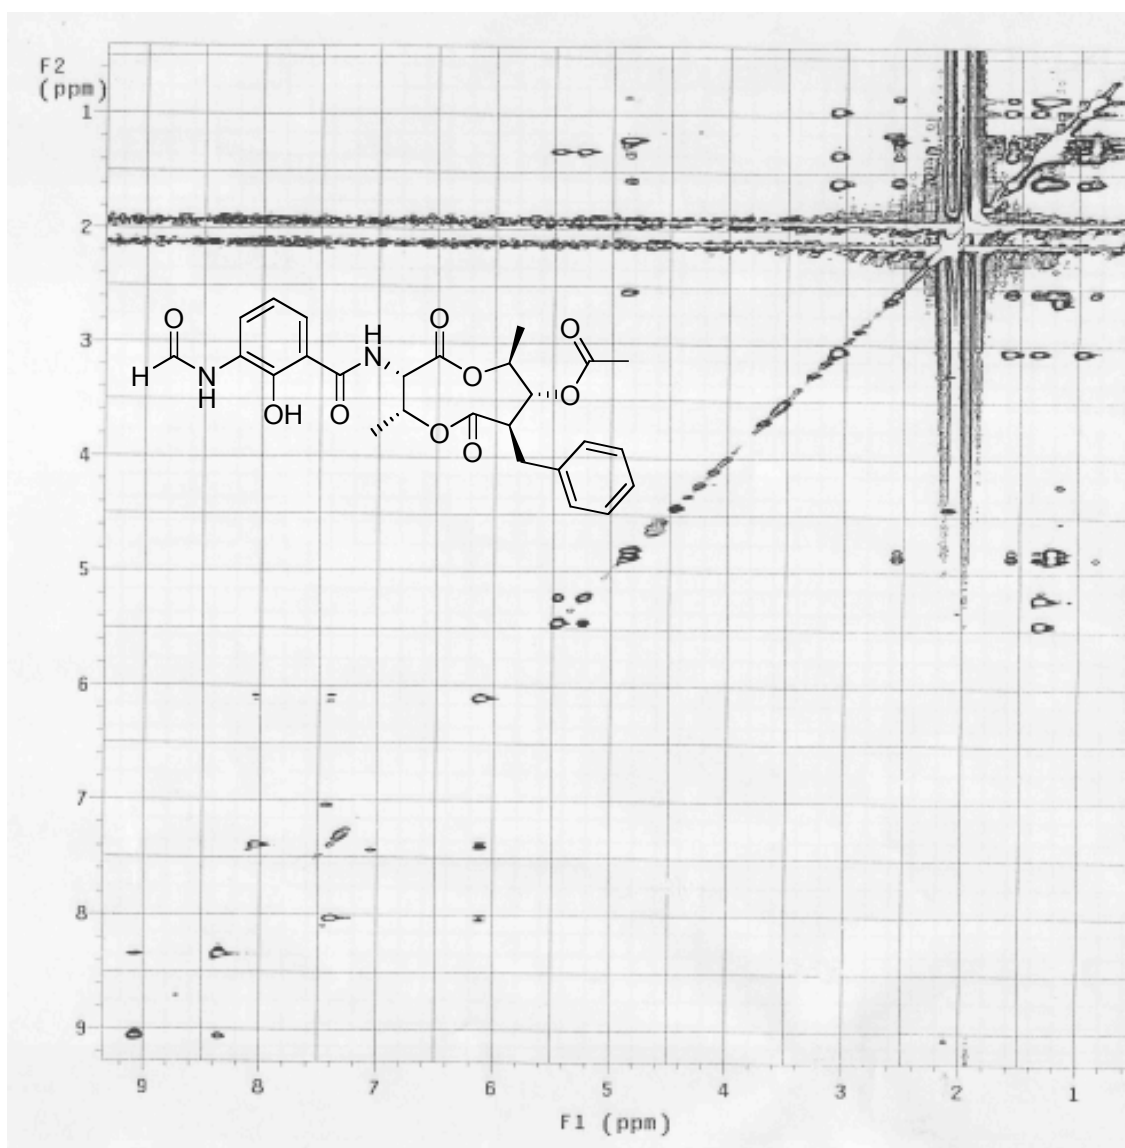



S6. Splenocin A (1) UV spectrum in MeCN

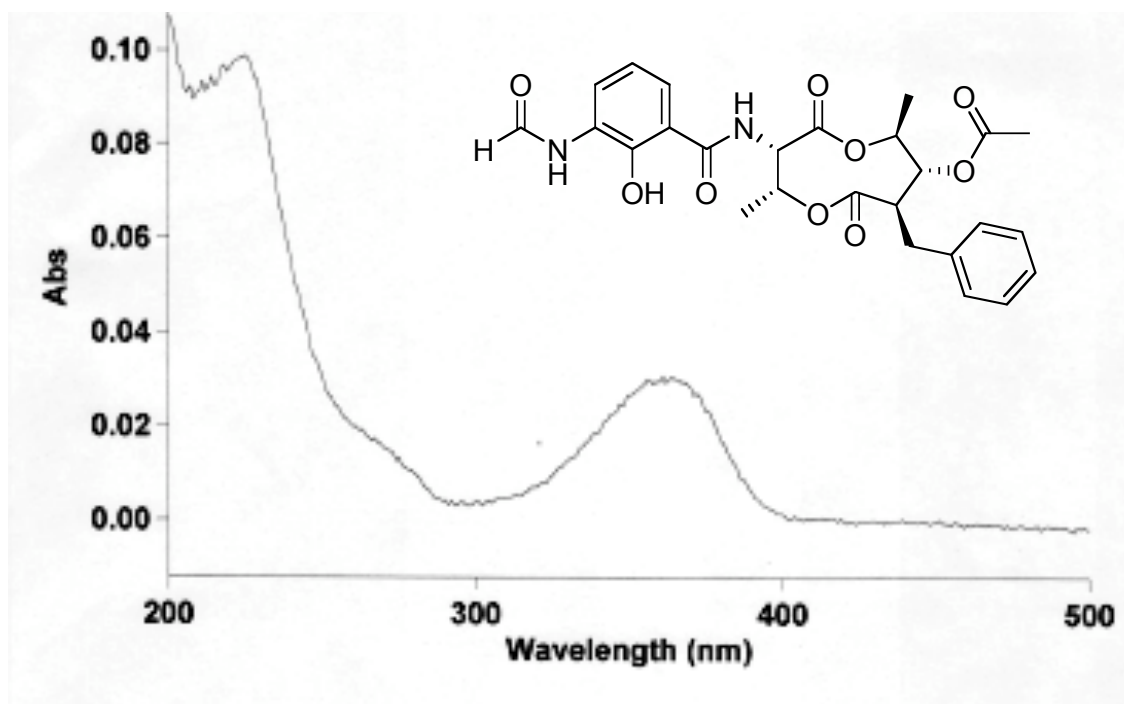



S8. LCMS Trace for Splenocin A (1).

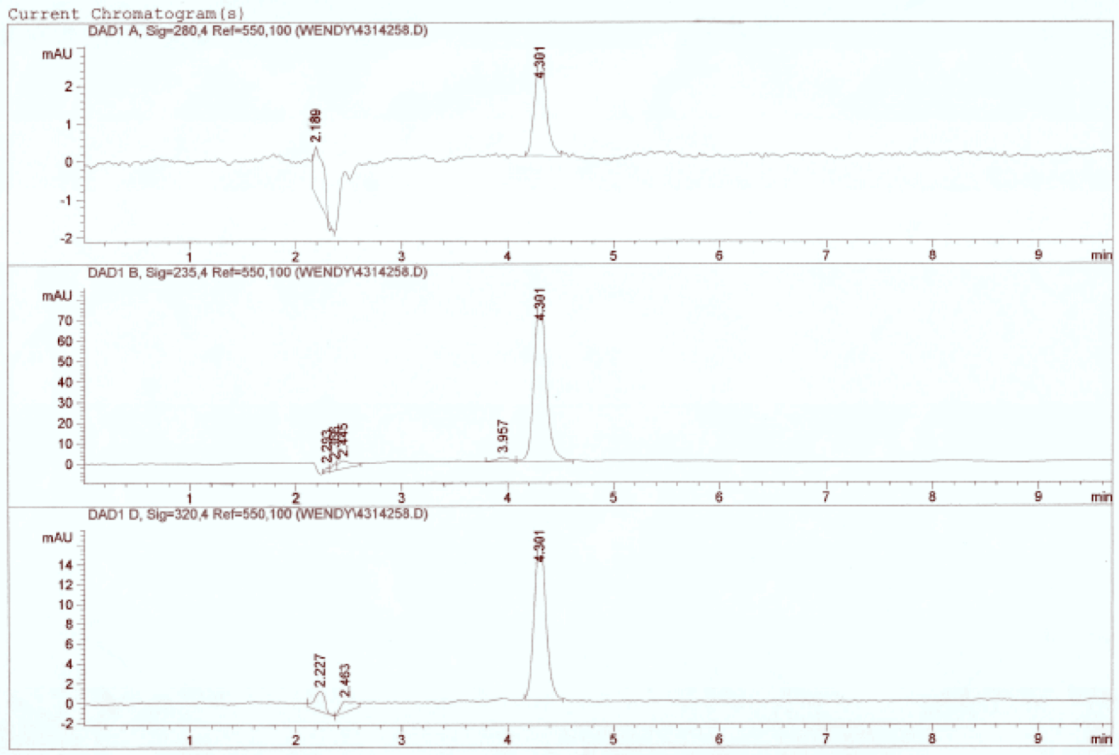



S10.  $^{13}\text{C}$  NMR for Splenocin B (**2**) in  $\text{CDCl}_3$ .

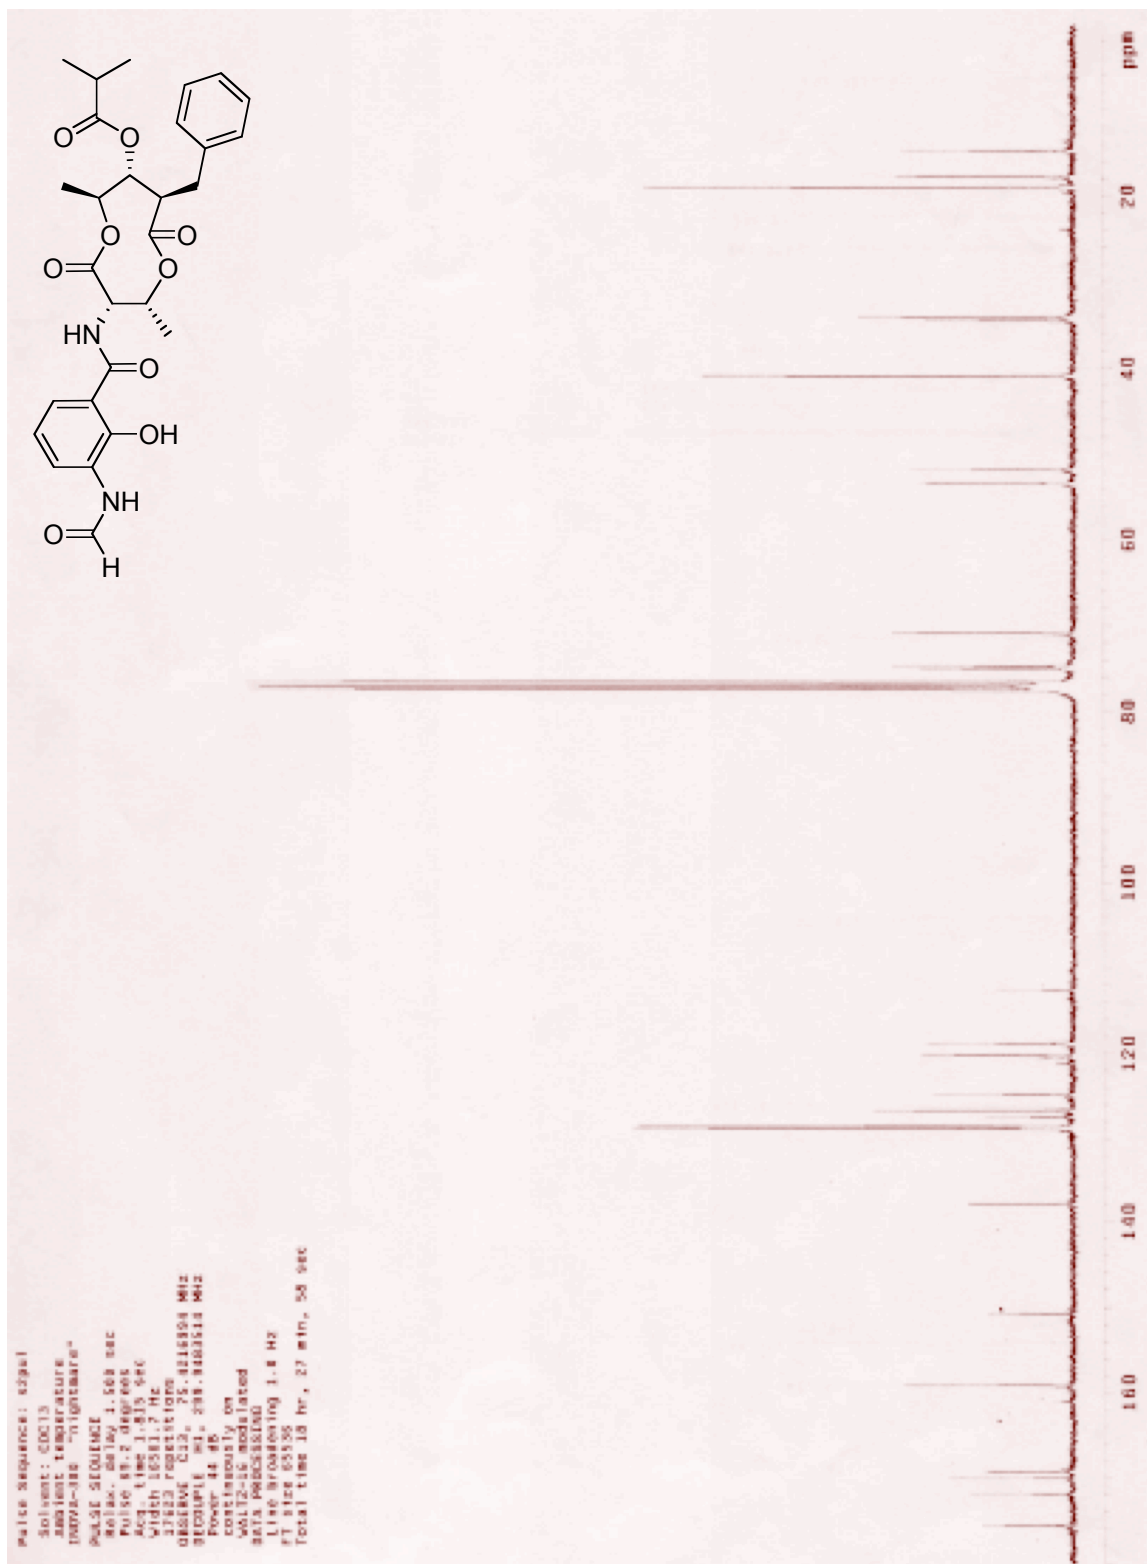

S11. gCOSY for Splenocin B (2) in CDCl<sub>3</sub>.

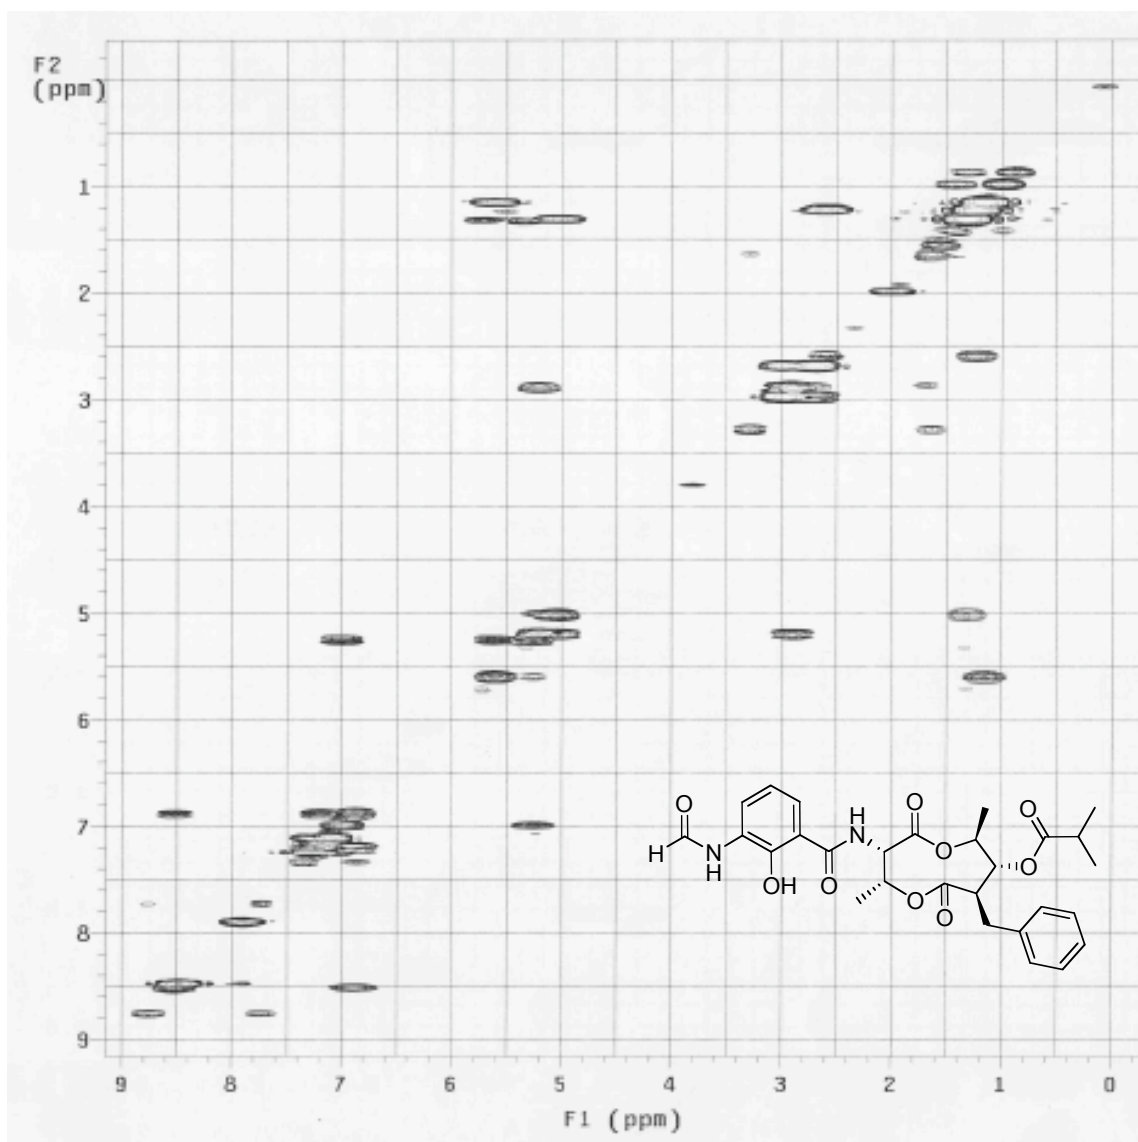

S12. gHSQC for Splenocin B (**2**) in CDCl<sub>3</sub>.

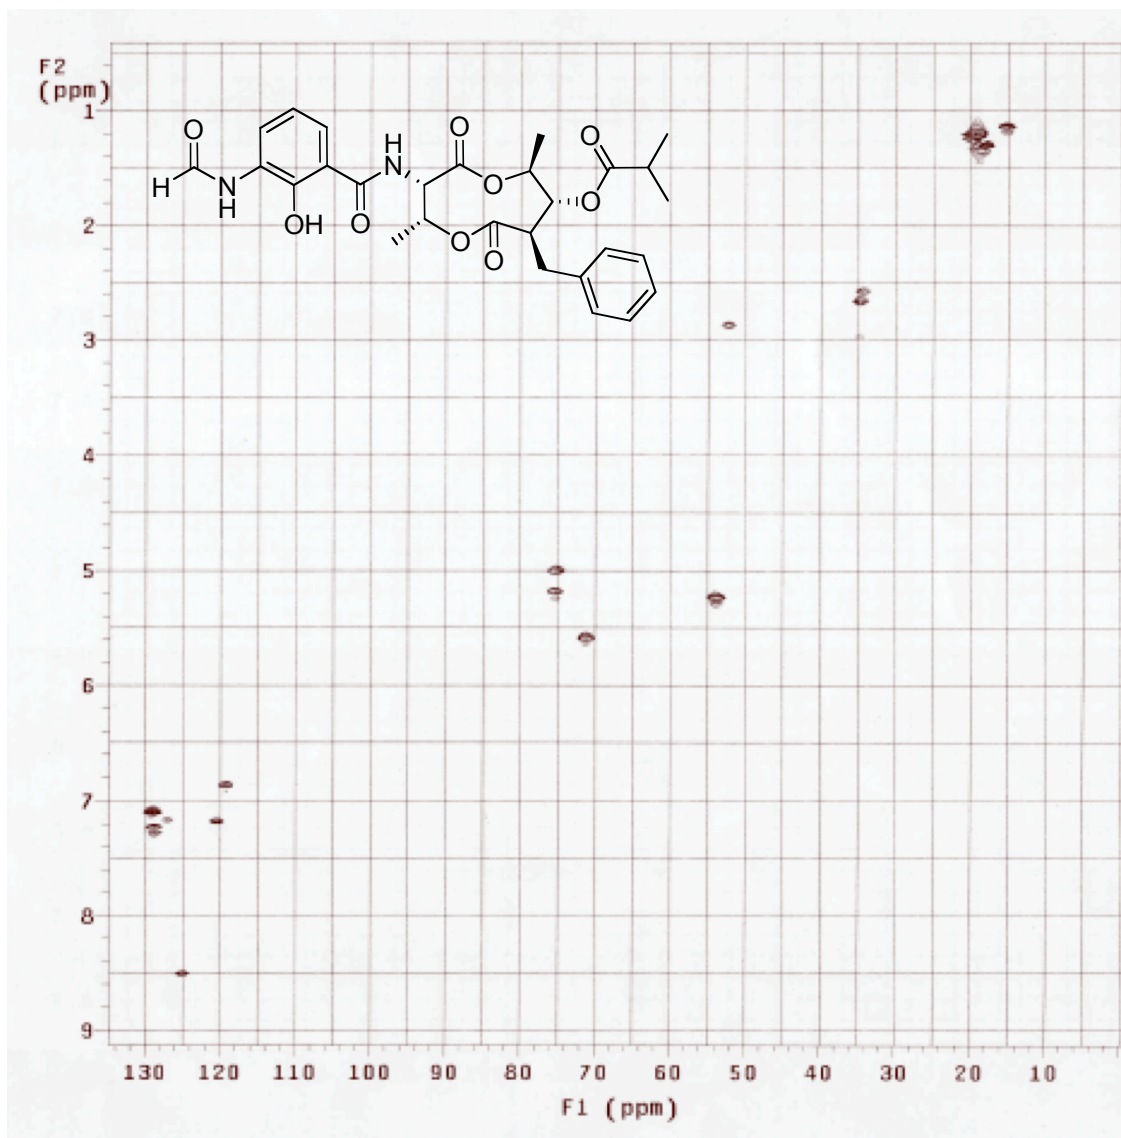

S13. gHMBC spectrum for Splenocin B (2) in CDCl<sub>3</sub>.

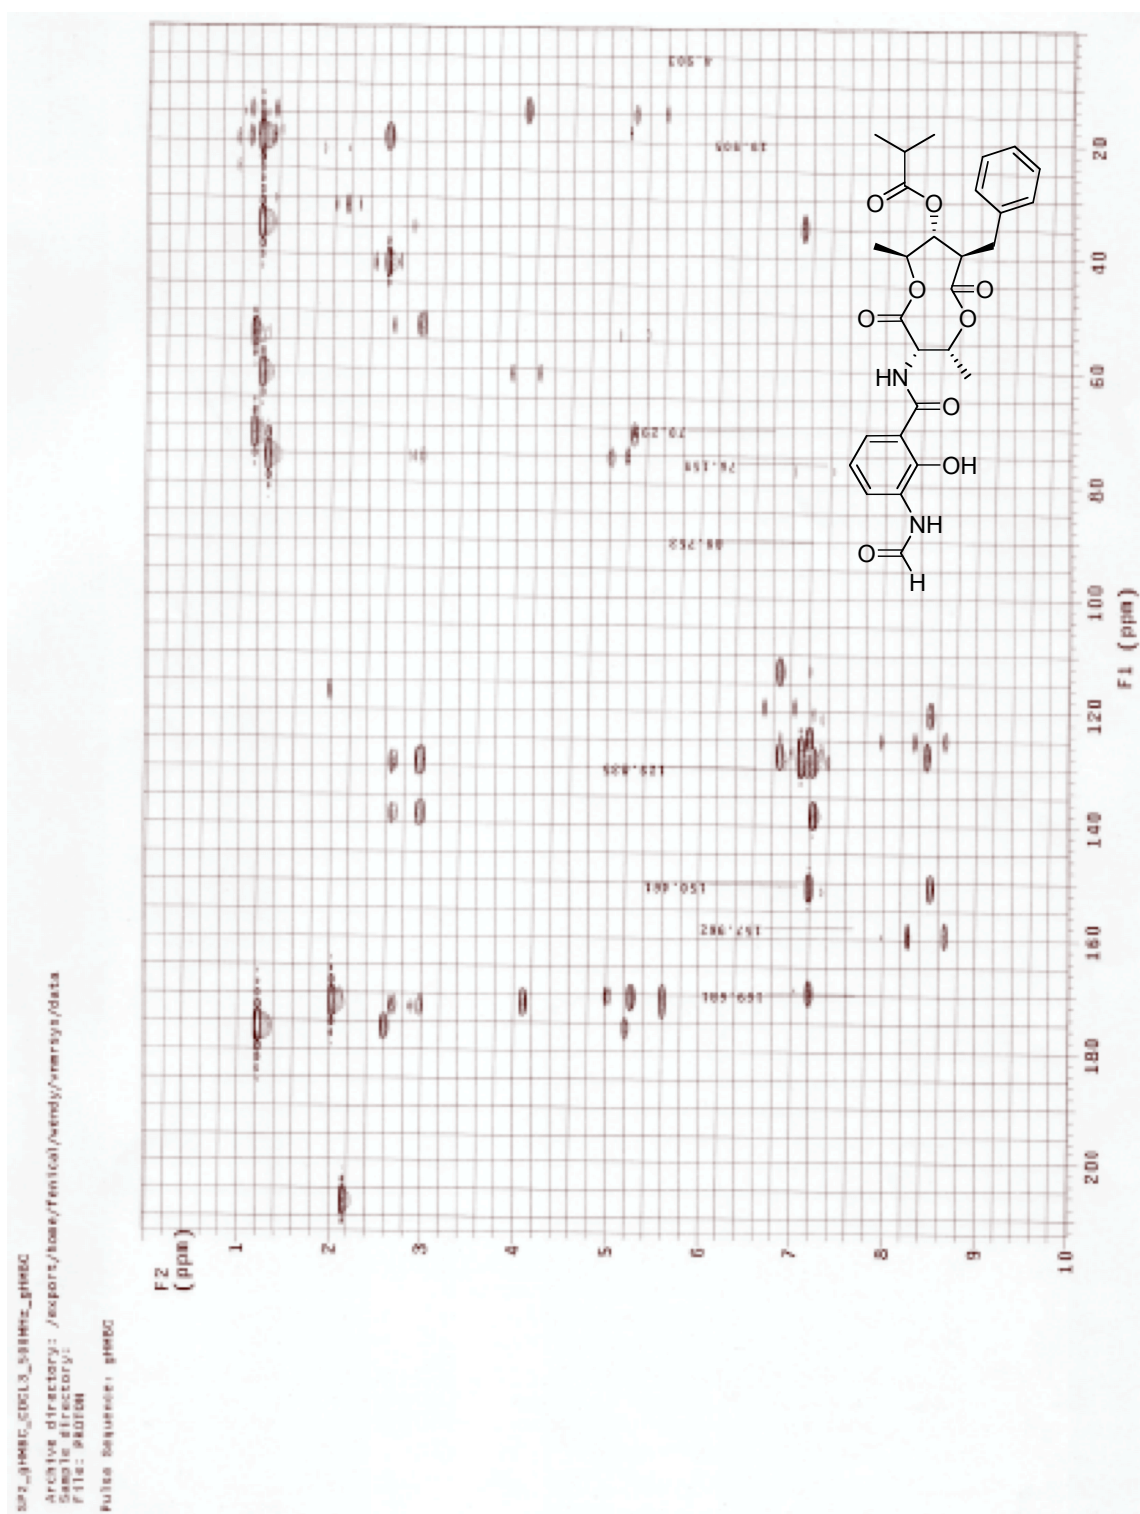



S14. UV Spectrum for Splenocin B (2) in MeCN

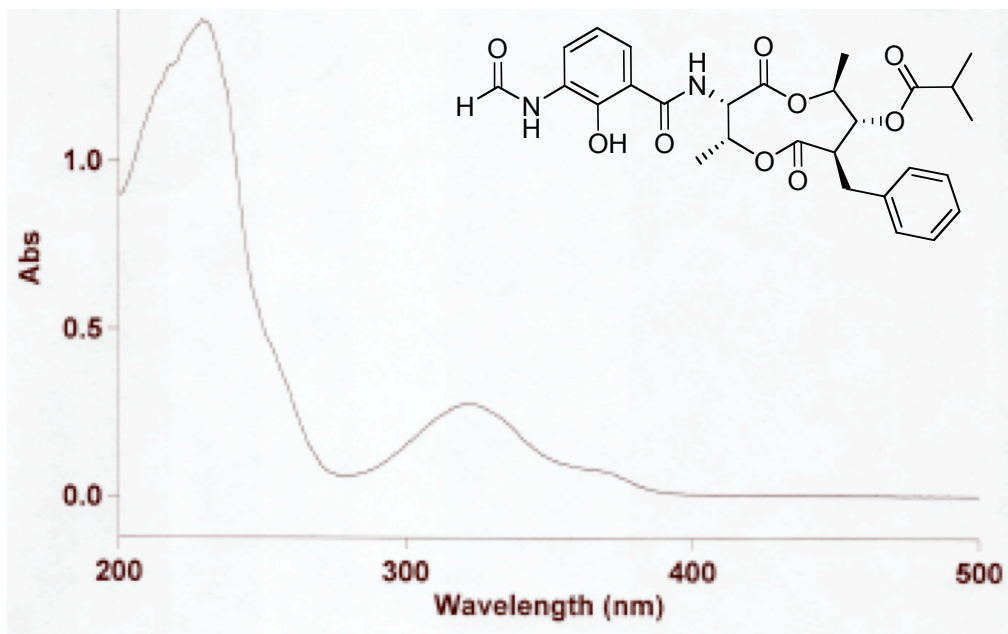

S15. HRMS for Splenocin B (2).

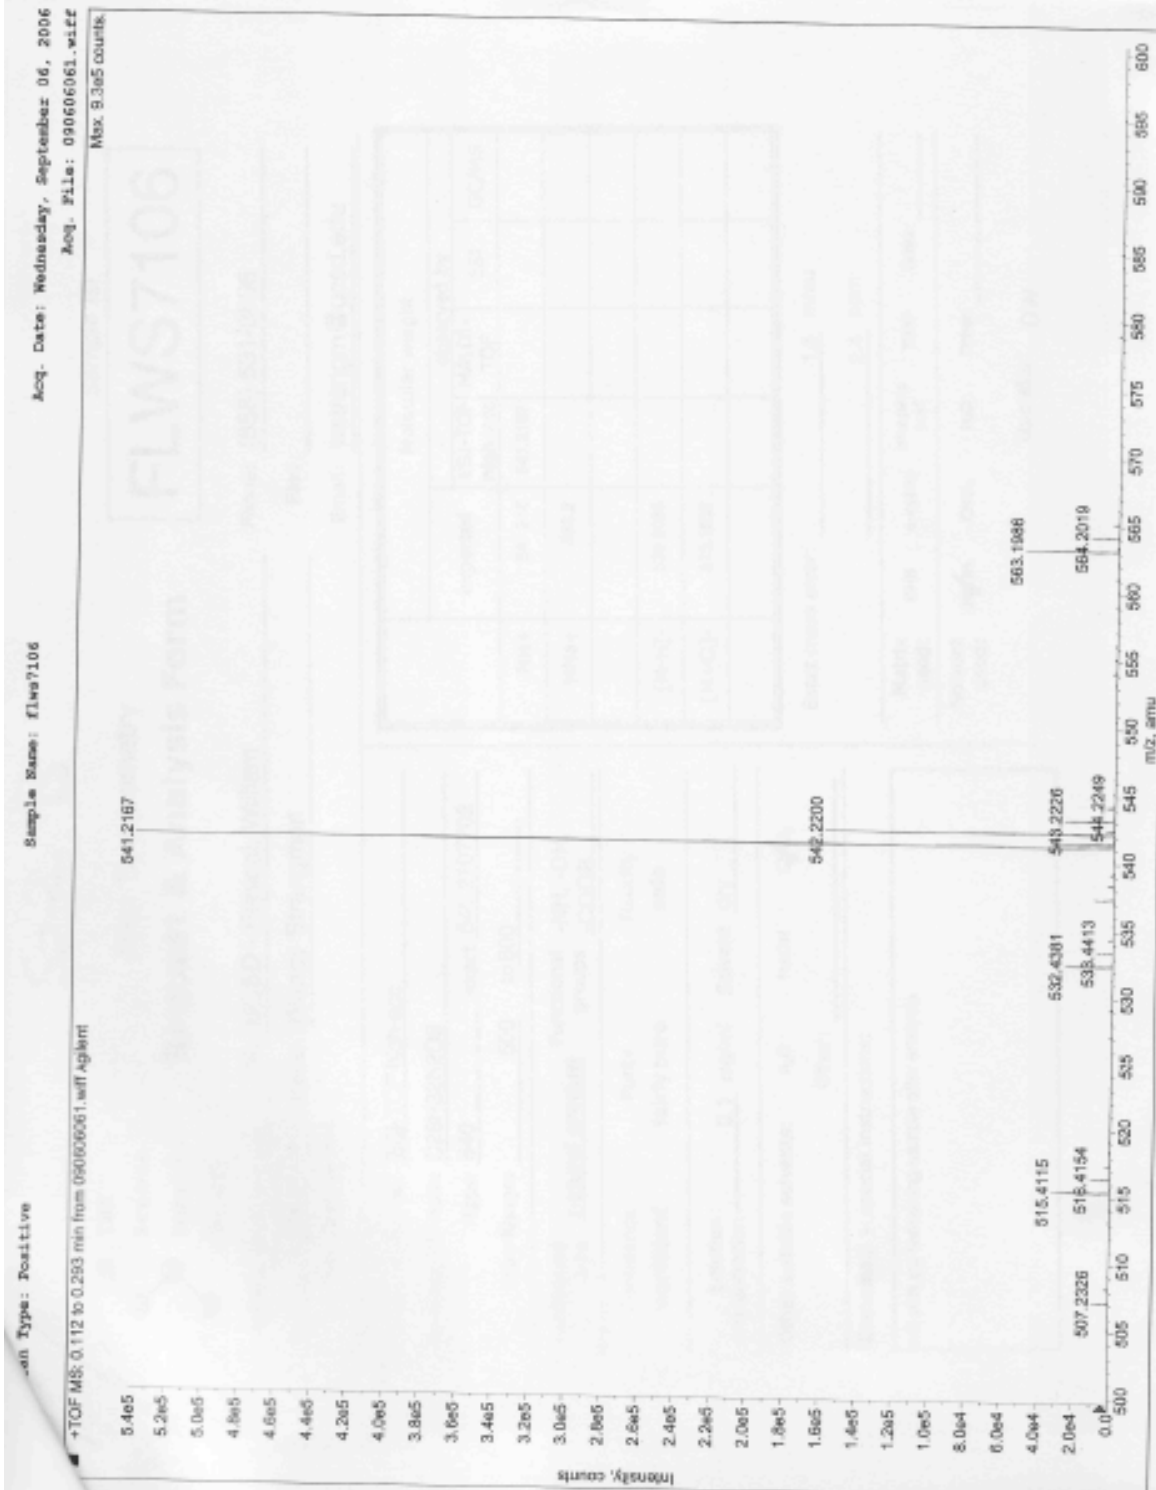

S16. LCMS Trace for Splenocin B (2).

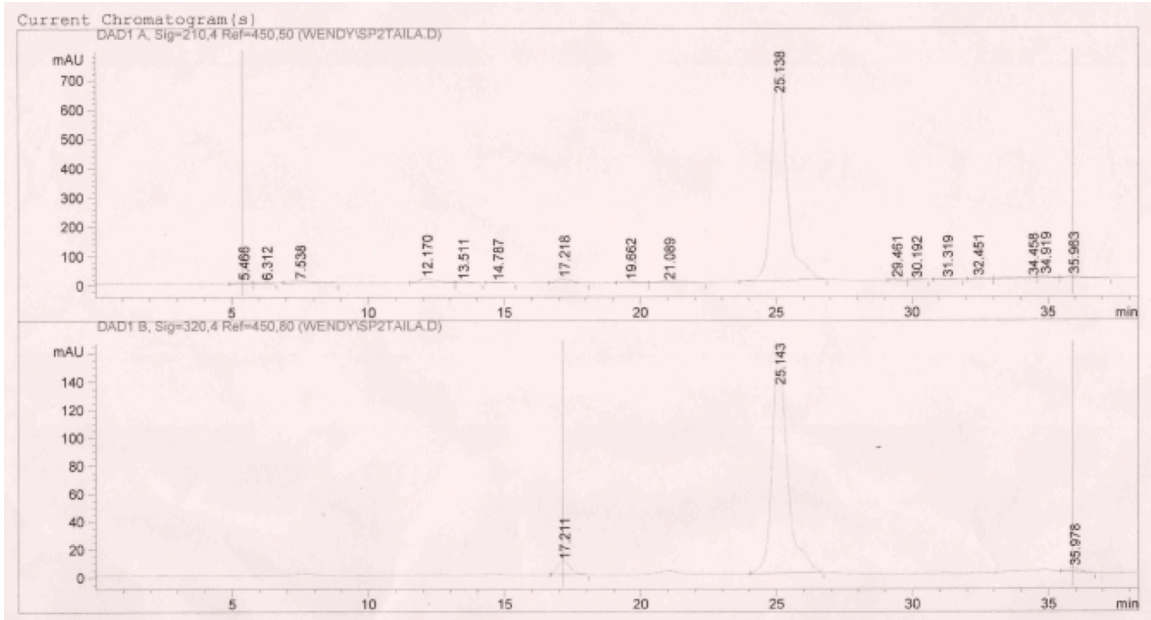

S17.  $^1\text{H}$  NMR spectrum for Splenocin C (**3**) in  $\text{CDCl}_3$ .

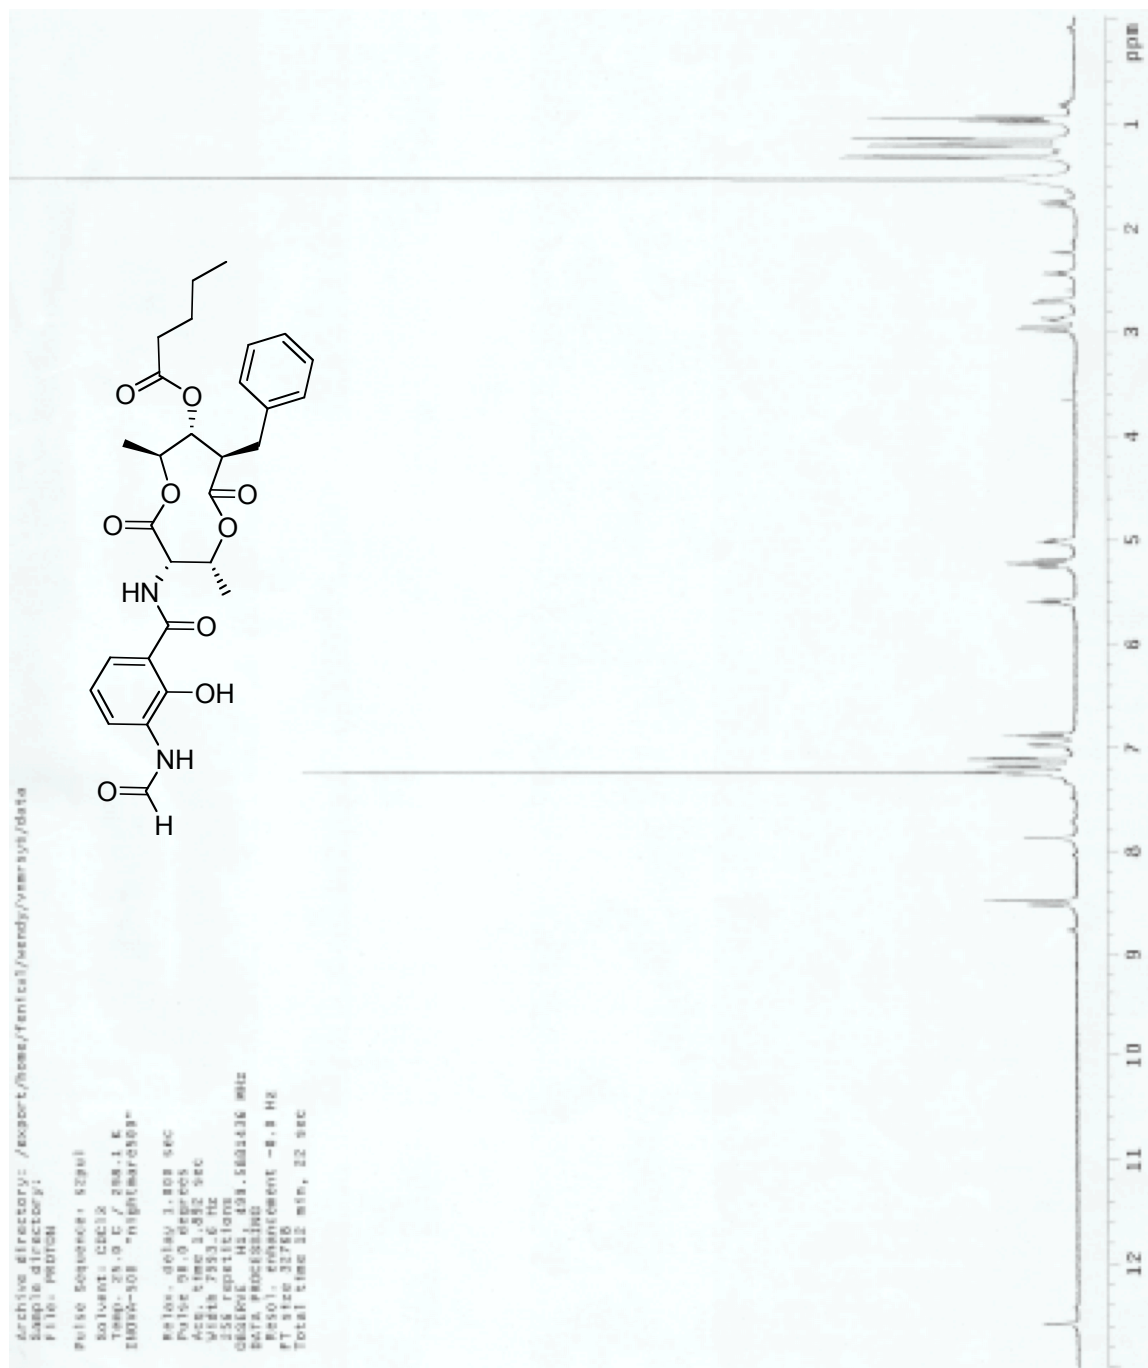

S18. <sup>13</sup> NMR spectrum for Splenocin C (**3**) in CDCl<sub>3</sub>.

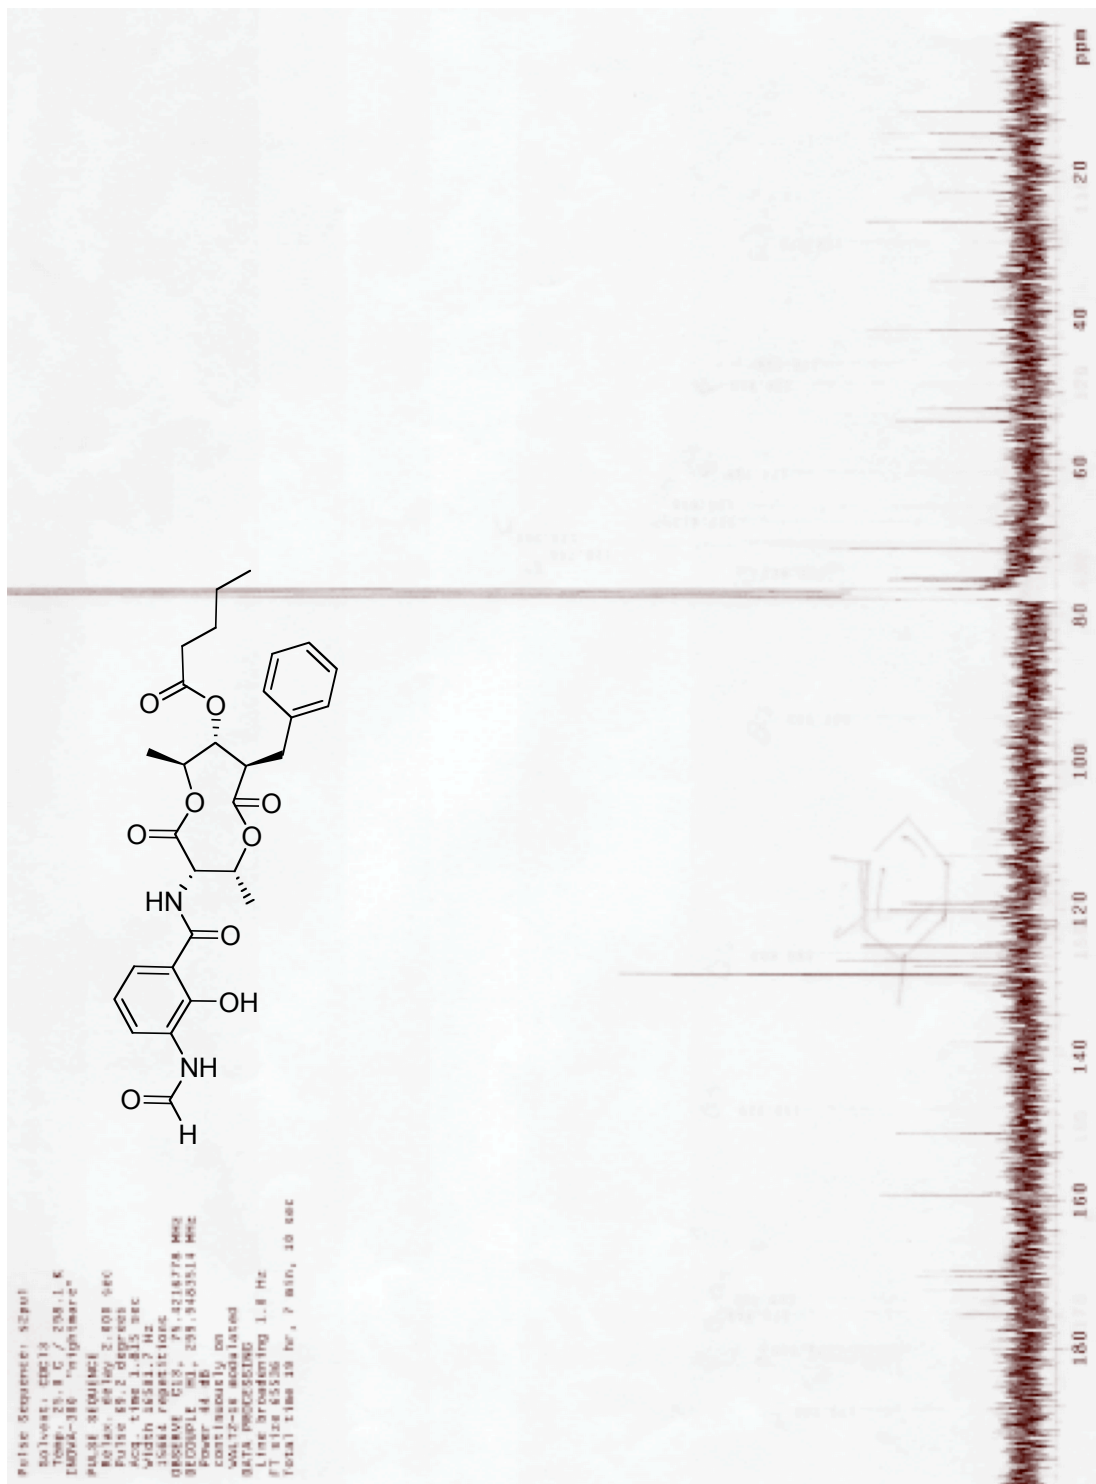

S19. gCOSY NMR Spectrum for Splenocin C (**3**) in CDCl<sub>3</sub>.

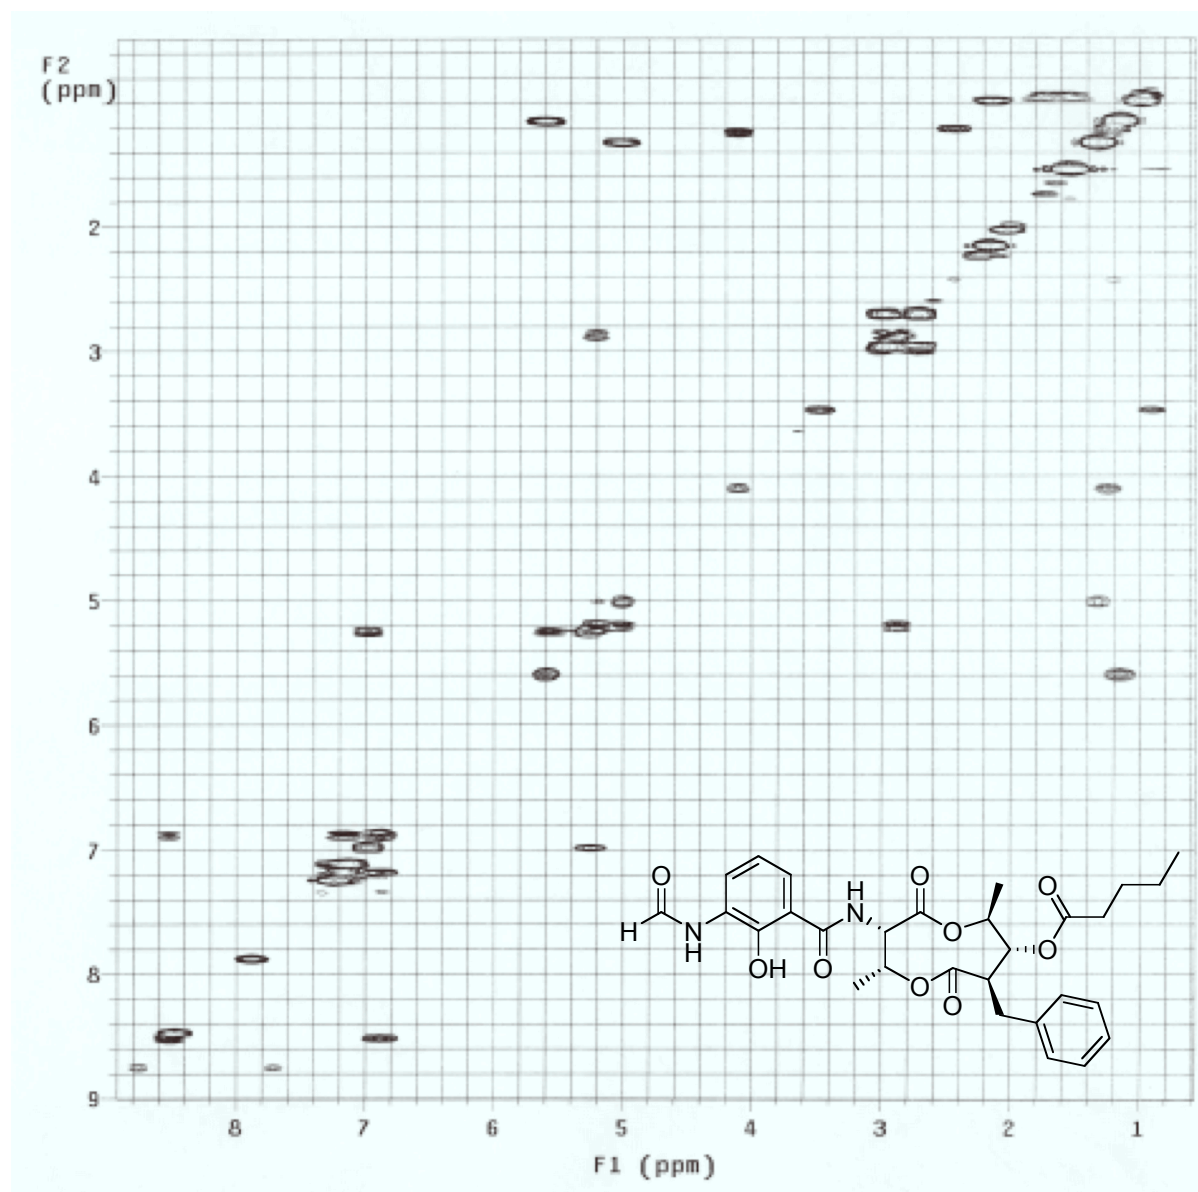

S20. gHSQC NMR spectrum for Splenocin C (**3**) in CDCl<sub>3</sub>.

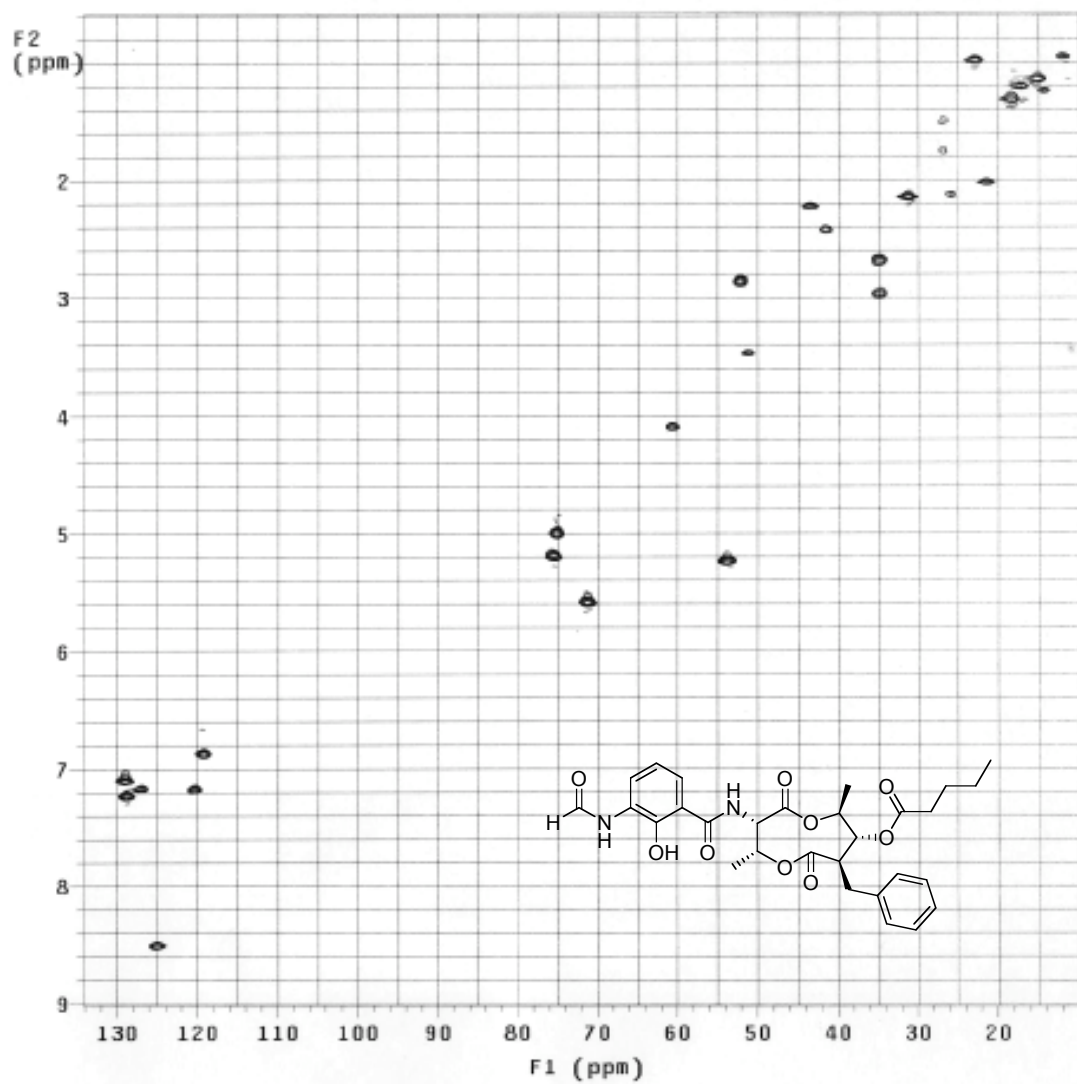

S21. gHMBC NMR spectrum for Splenocin C (**3**) in CDCl<sub>3</sub>.

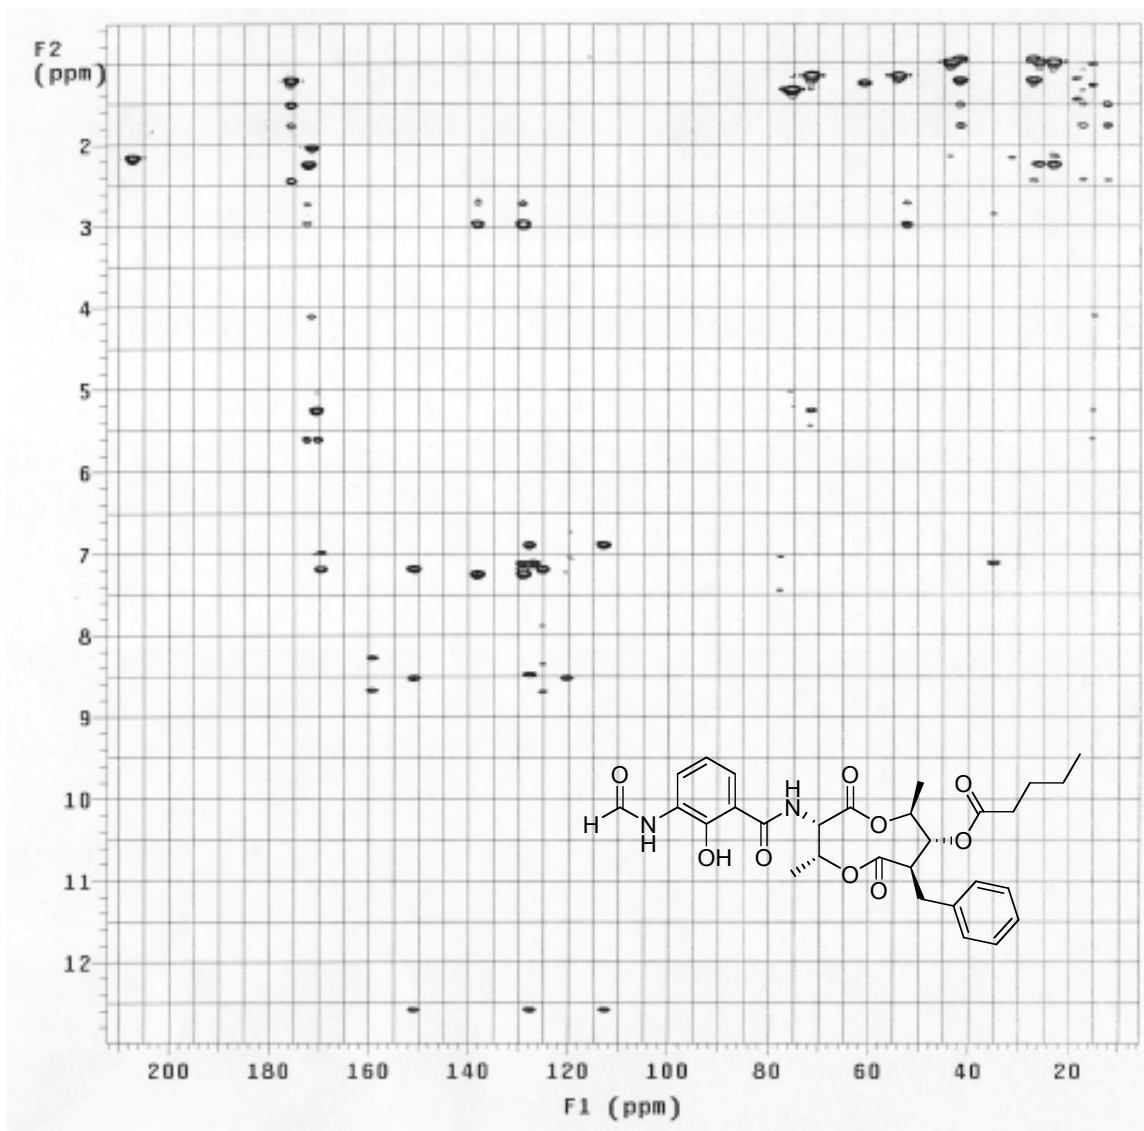



S22. UV Spectrum for Splenocin C (3) in MeCN.

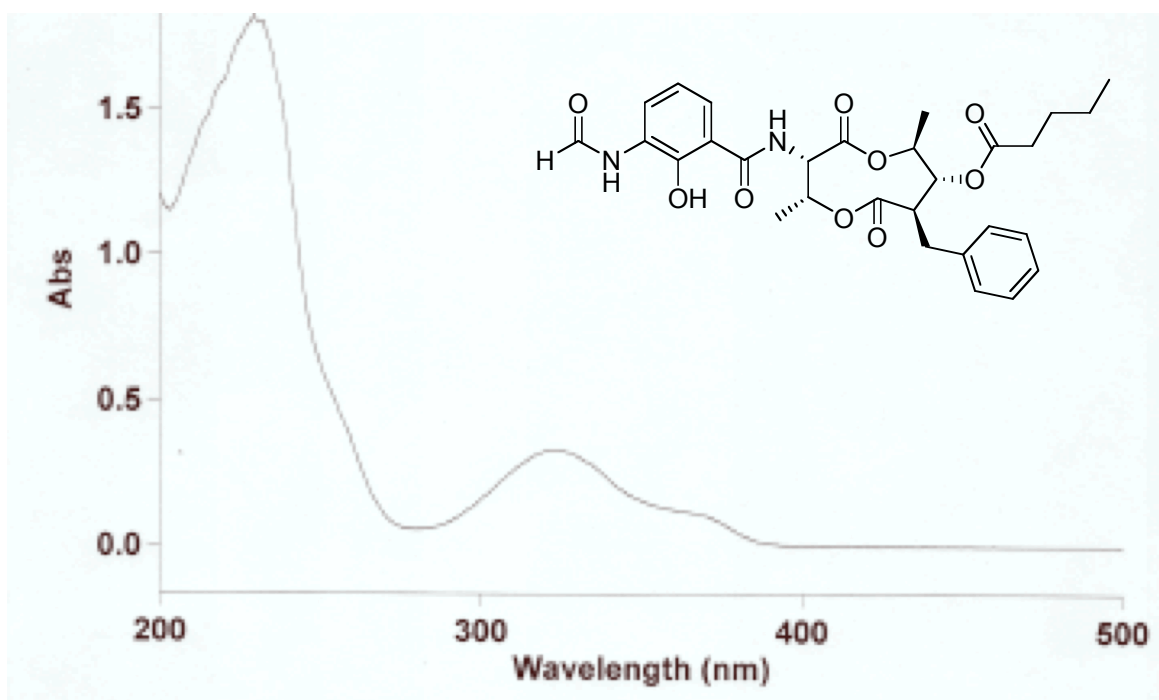

S23. HRMS for Splenocin C (3).

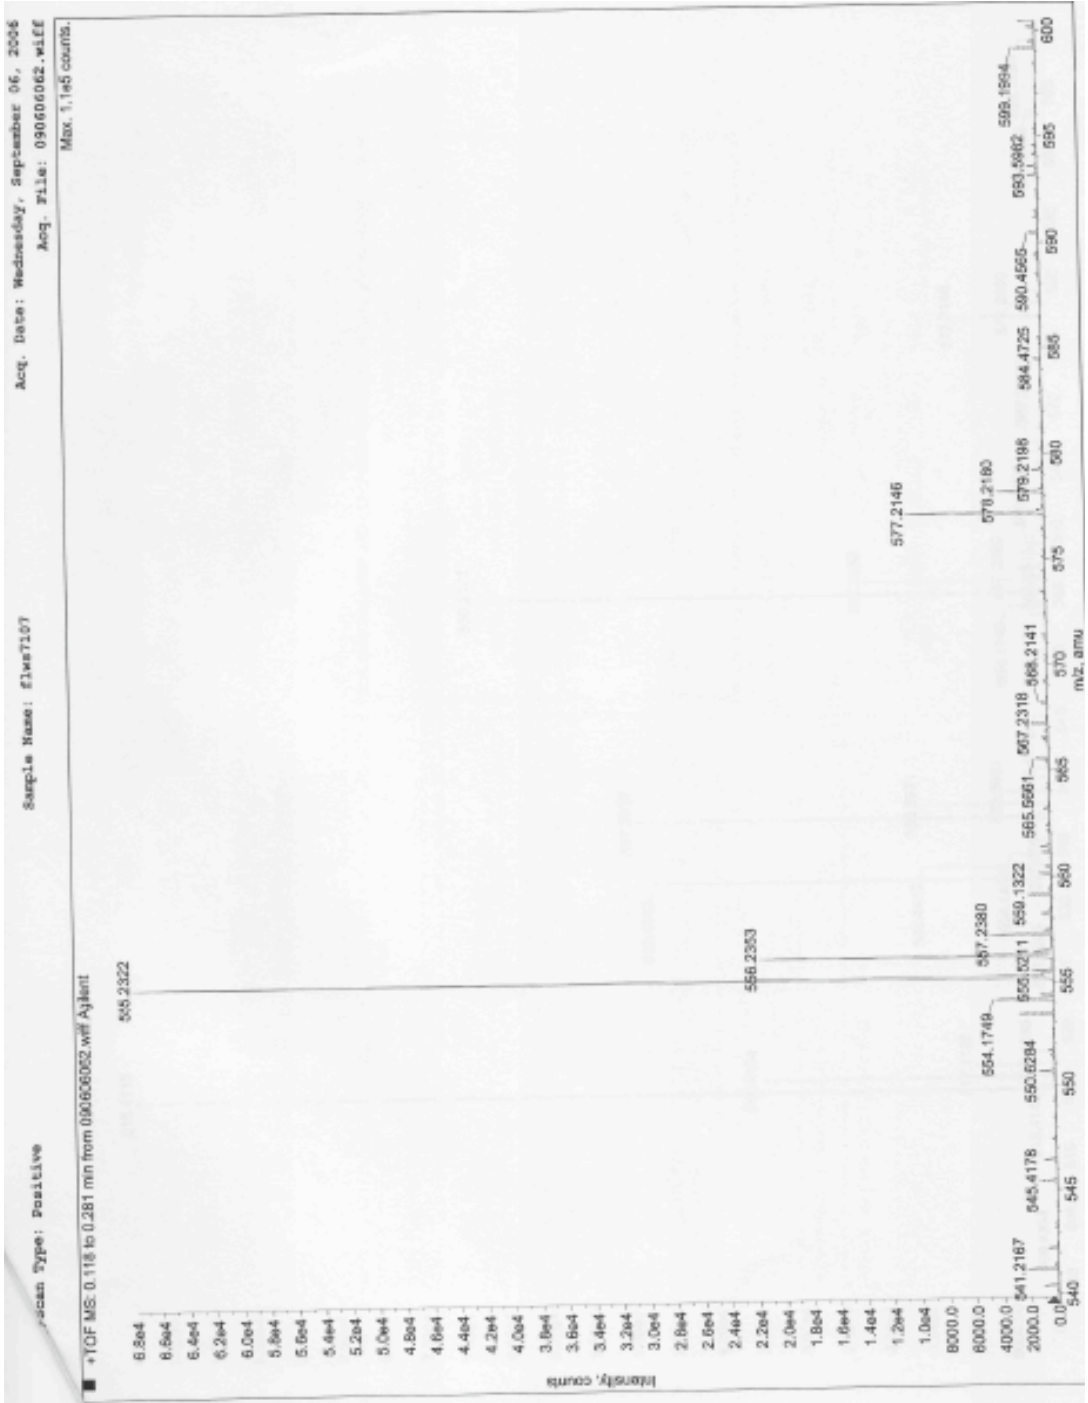

S24. LCMS Trace for Splenocin C (3).

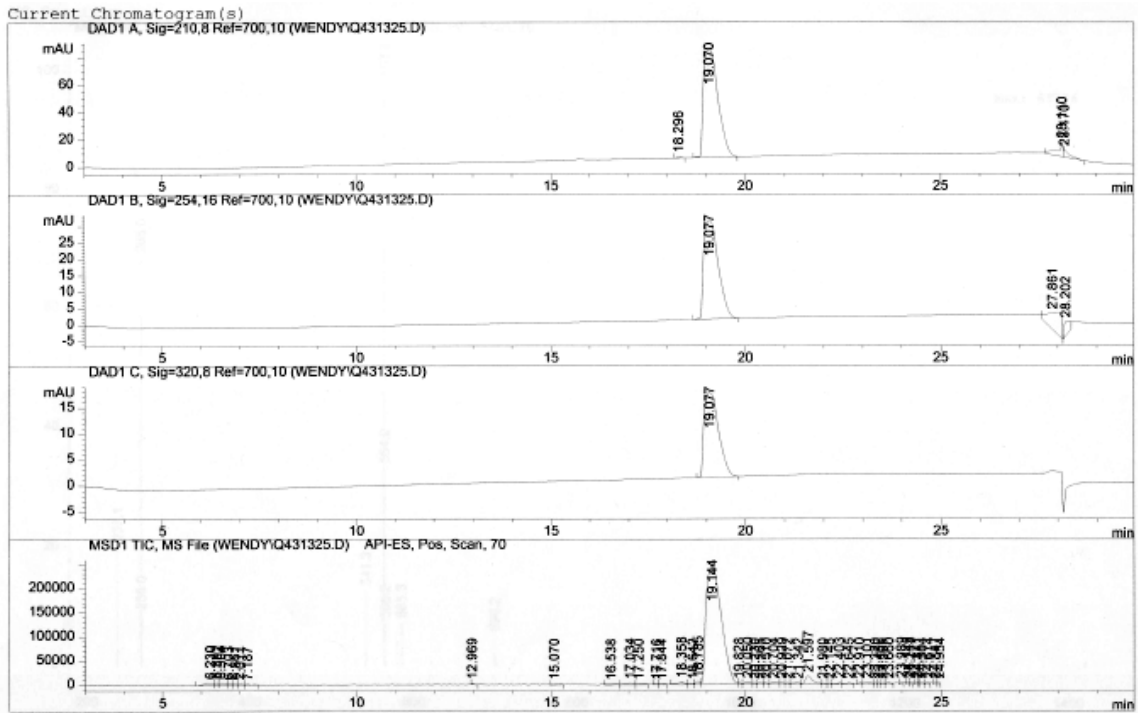

S25.  $^1\text{H}$  NMR Spectrum for Splenocin D (4) in  $\text{CDCl}_3$ .

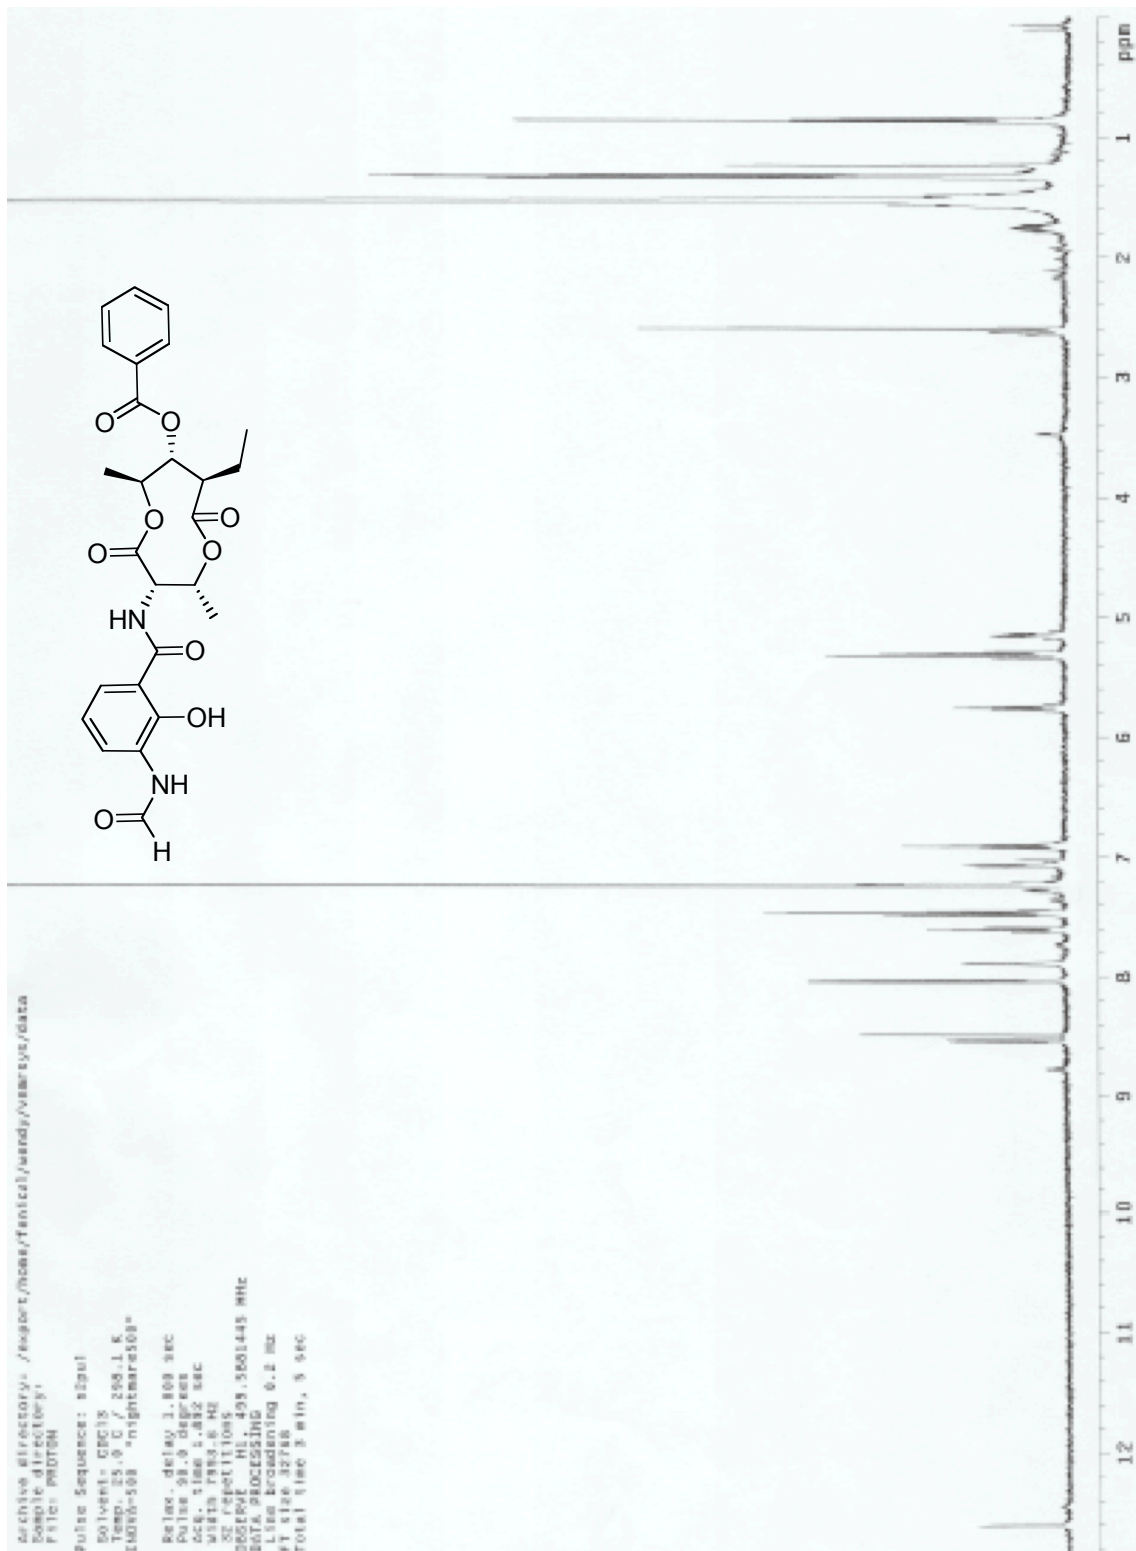

S26. gCOSY NMR Spectrum for Splenocin D (4) in CDCl<sub>3</sub>.

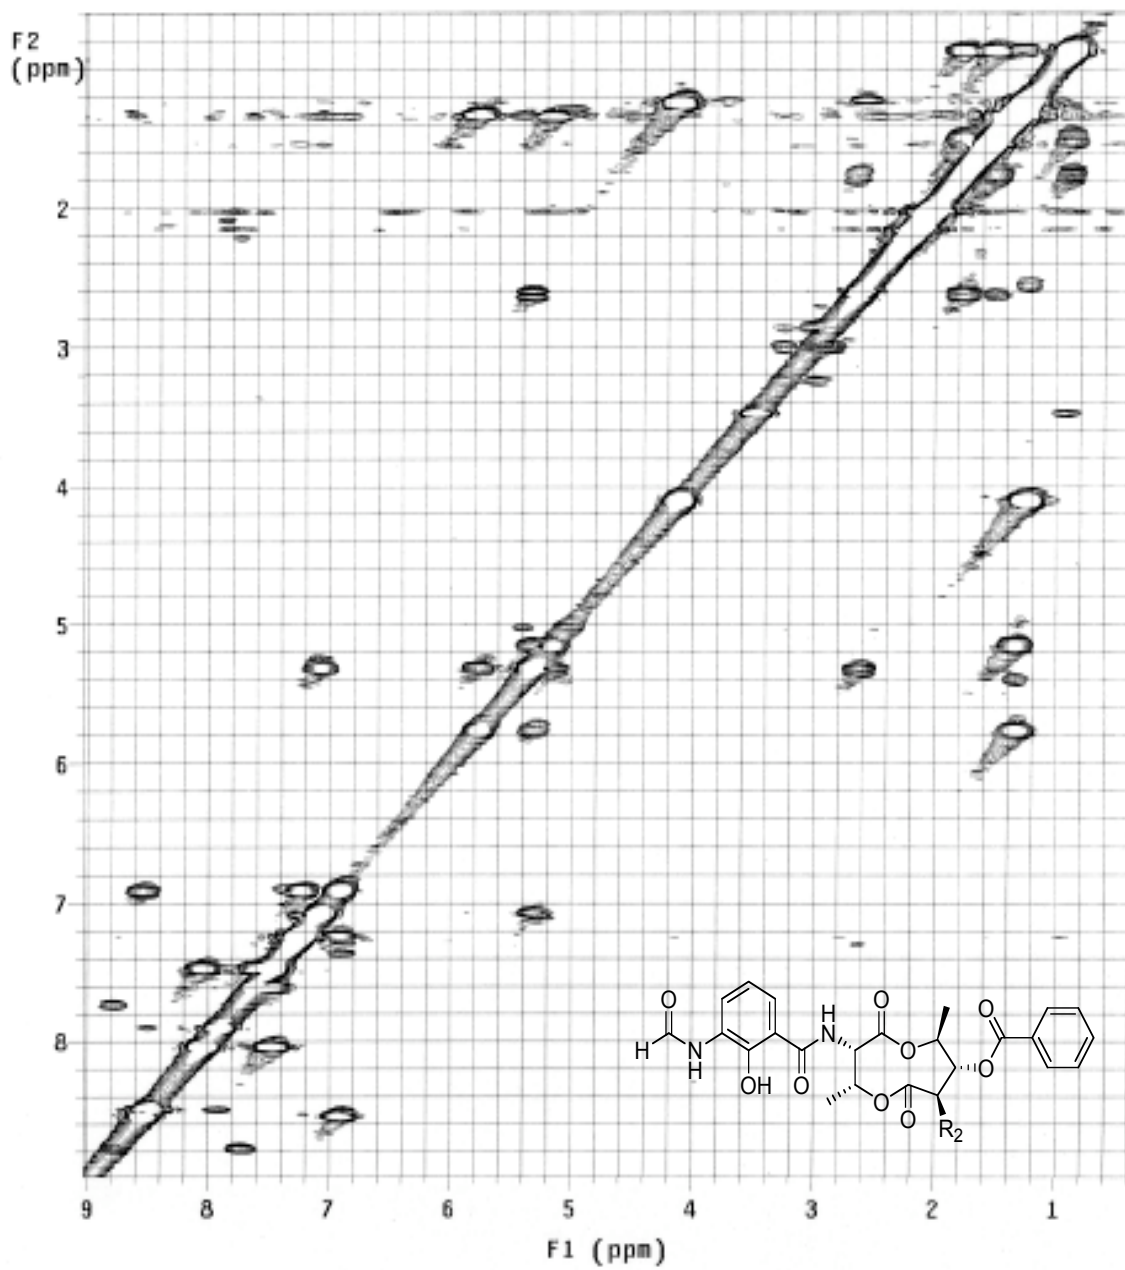

S27. gHSQC NMR Spectrum of Splenocin D(4) in CDCl<sub>3</sub>.

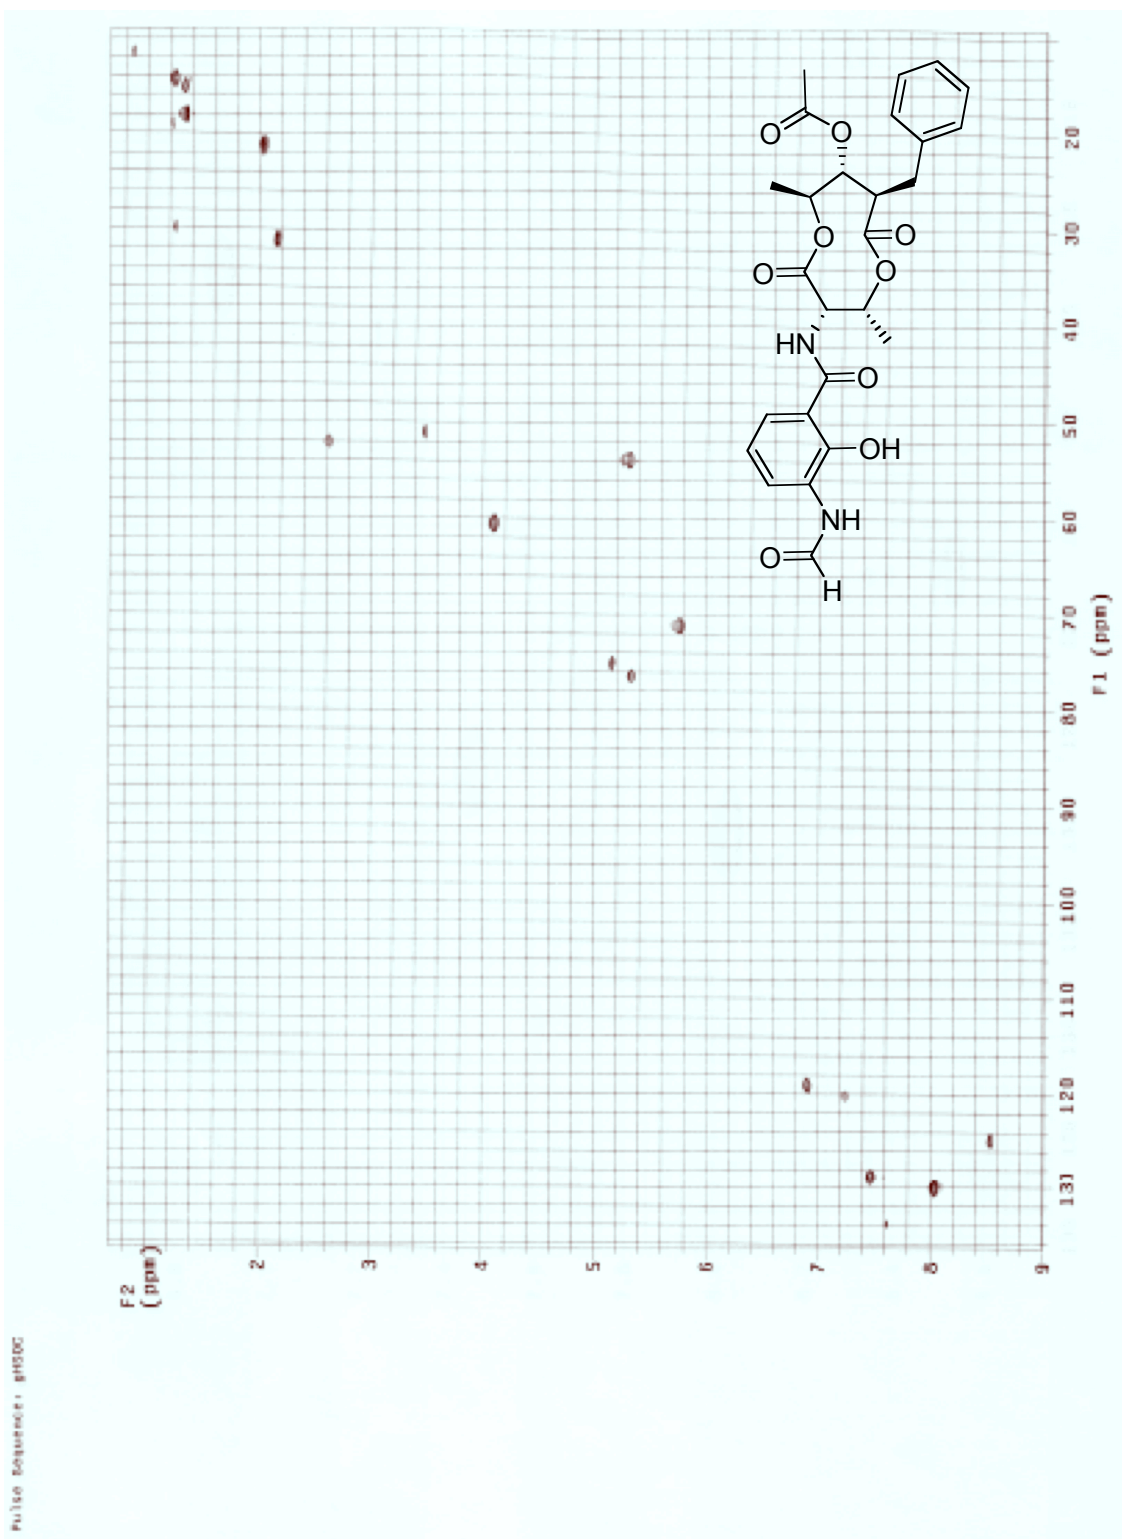

S28. gHMBC NMR spectrum for splenocin D (4) in CDCl<sub>3</sub>.

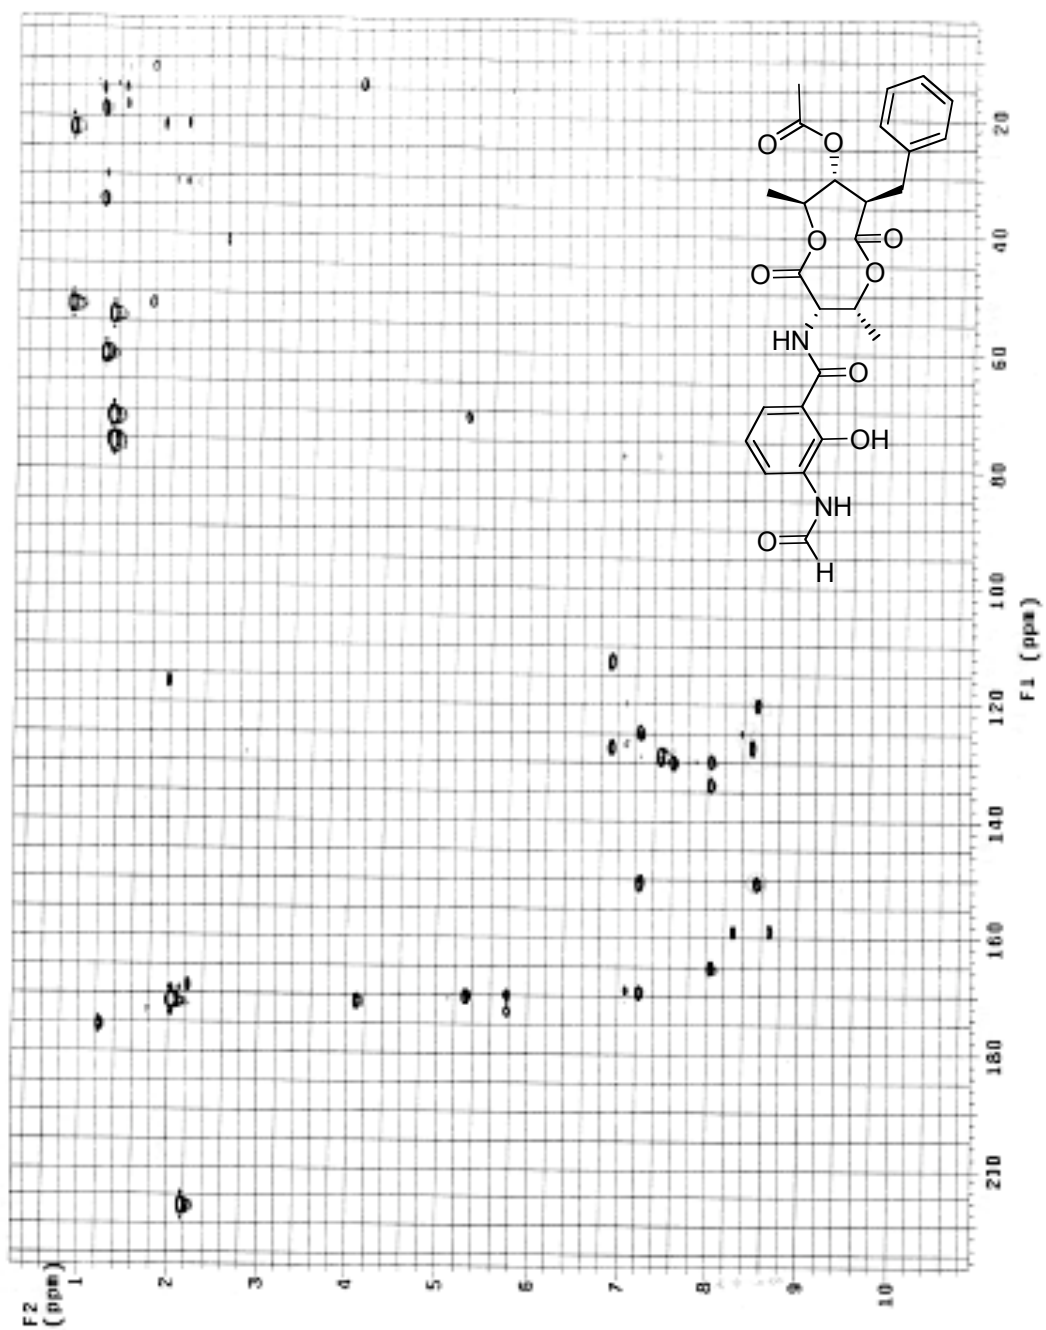

Pulse Sequence: ghmec

S29. UV spectrum for Splenocin D (4) in MeCN.

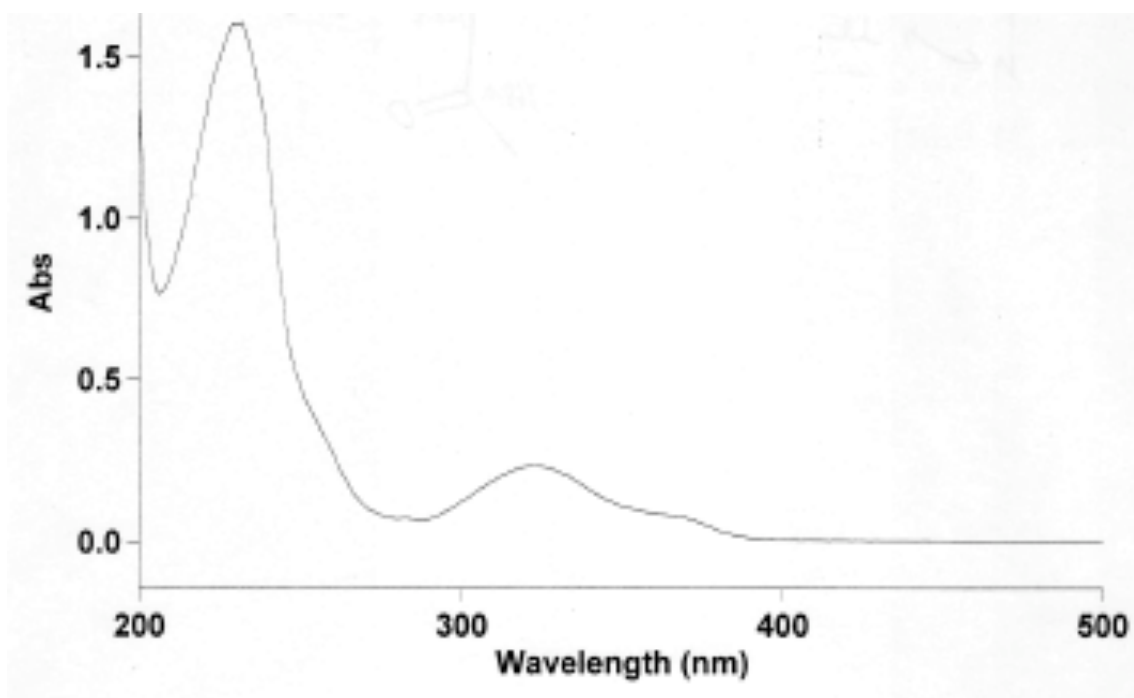



S30. HRMS for Splenocin D (4).

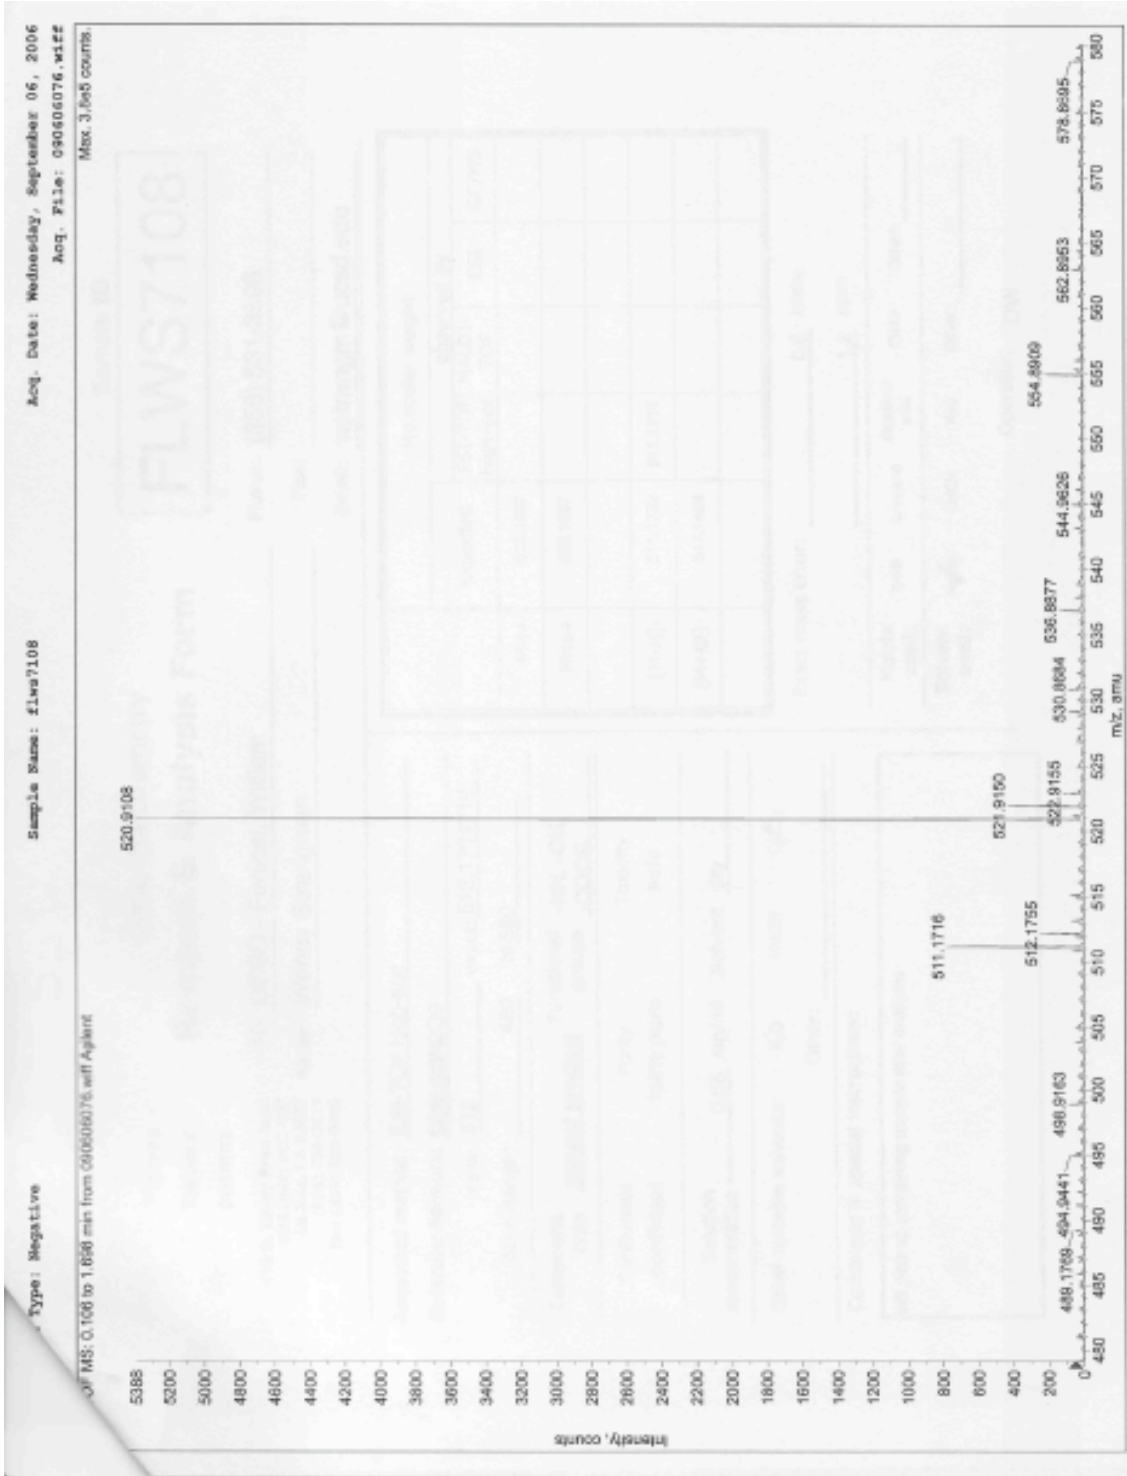

S31. LCMS Trace for Splenocin D (4).

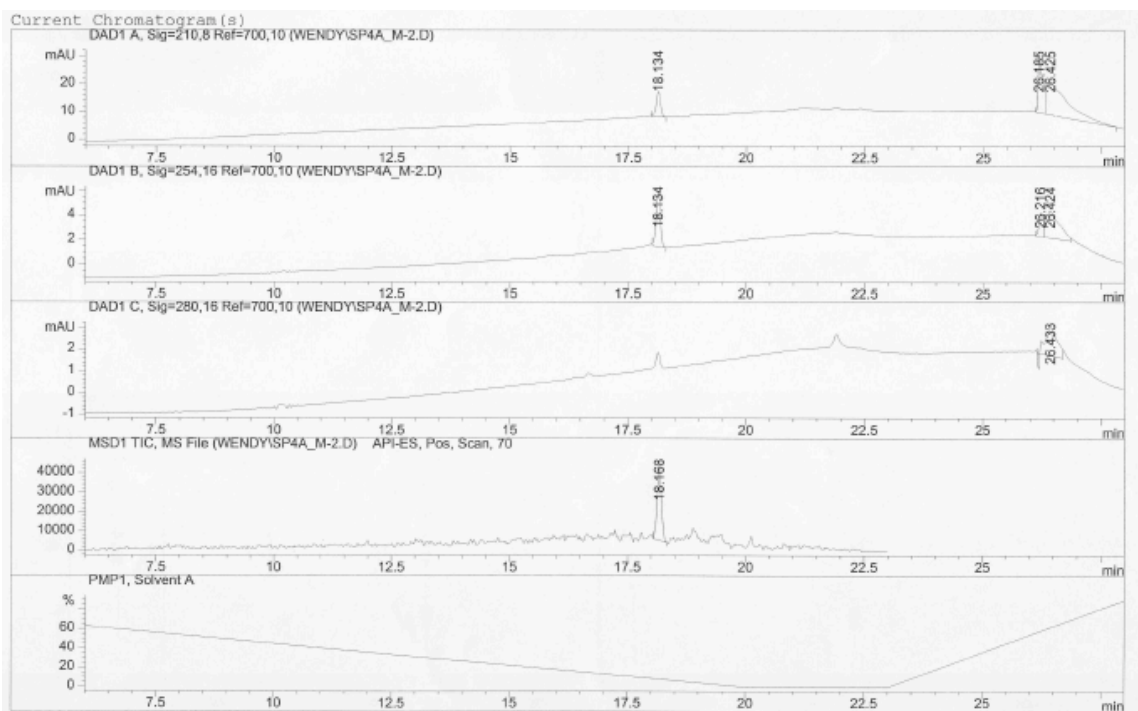

S32.  $^1\text{H}$  NMR Spectrum for Splenocin E (5) in  $\text{CDCl}_3$ .

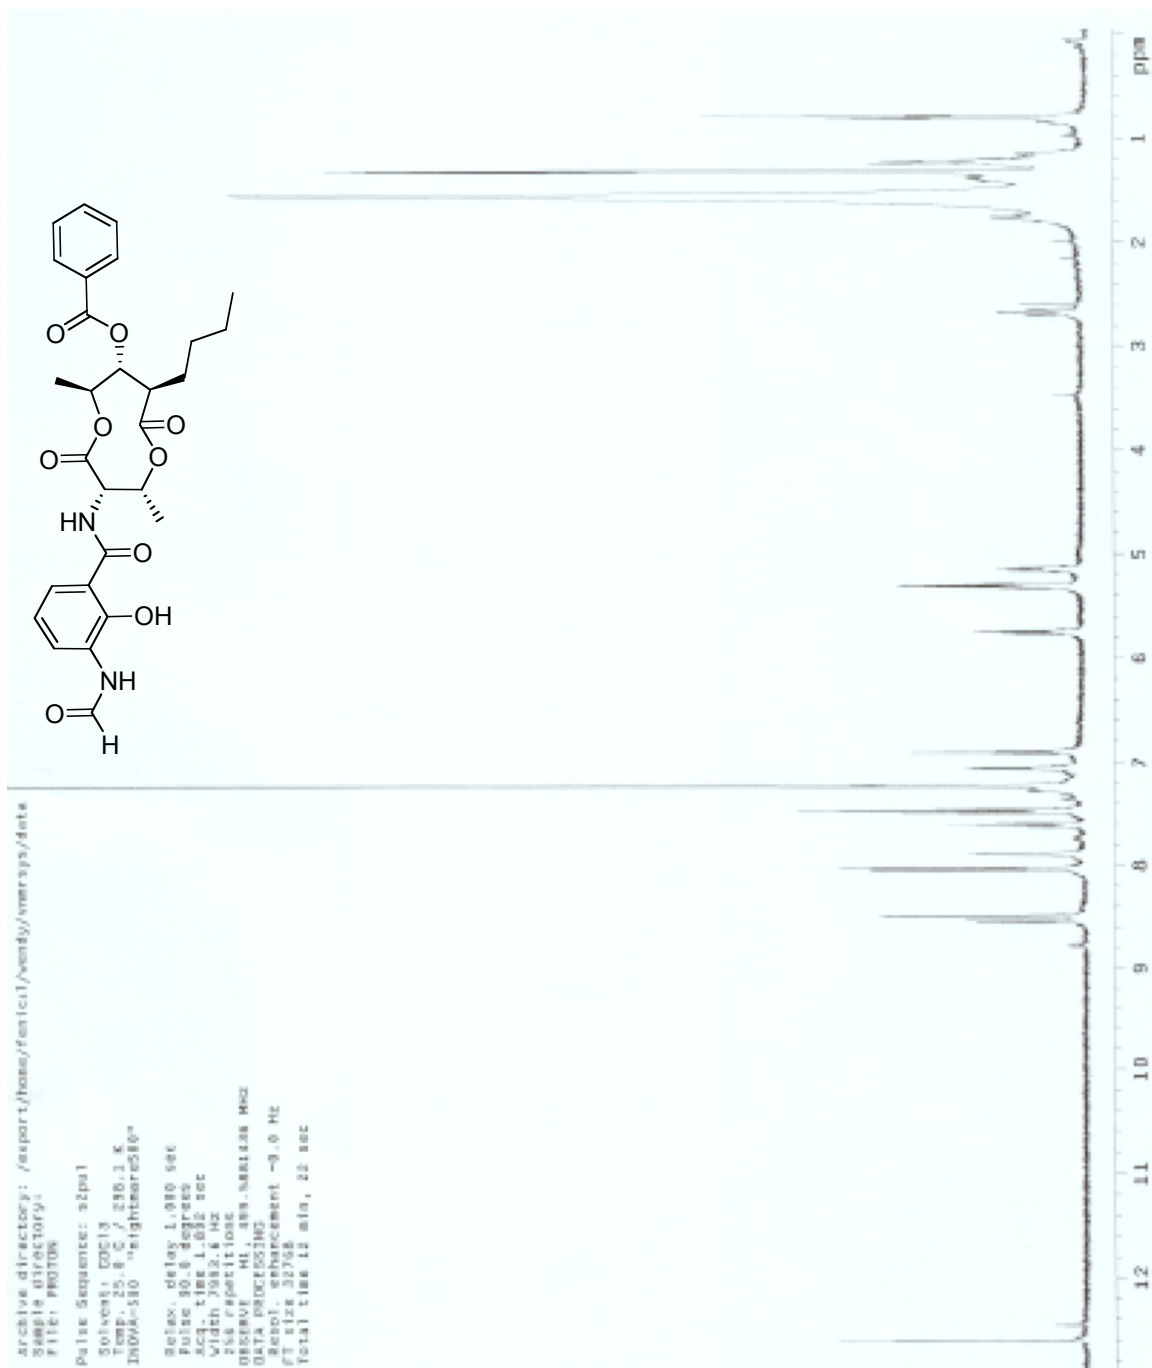

S33.  $^{13}\text{C}$  NMR Spectrum for Splenocin E (5) in  $\text{CDCl}_3$ .

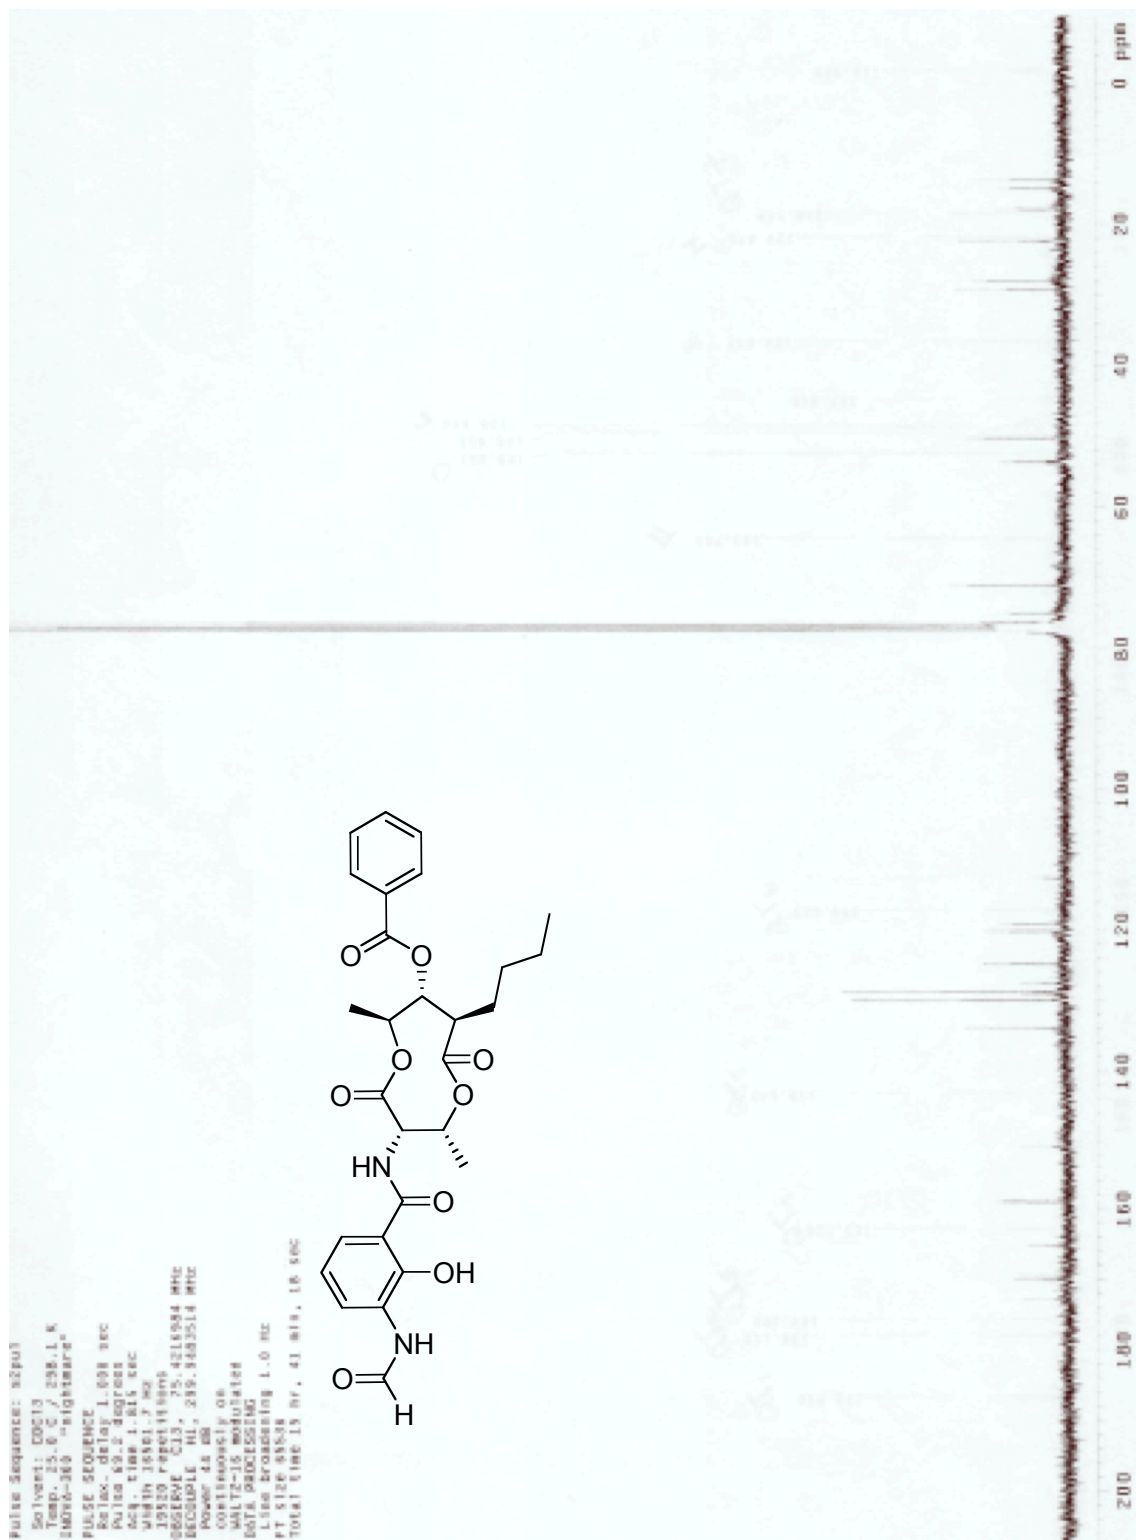





S36. gHSQC NMR spectrum of Splenocin E (5) in CDCl<sub>3</sub>.

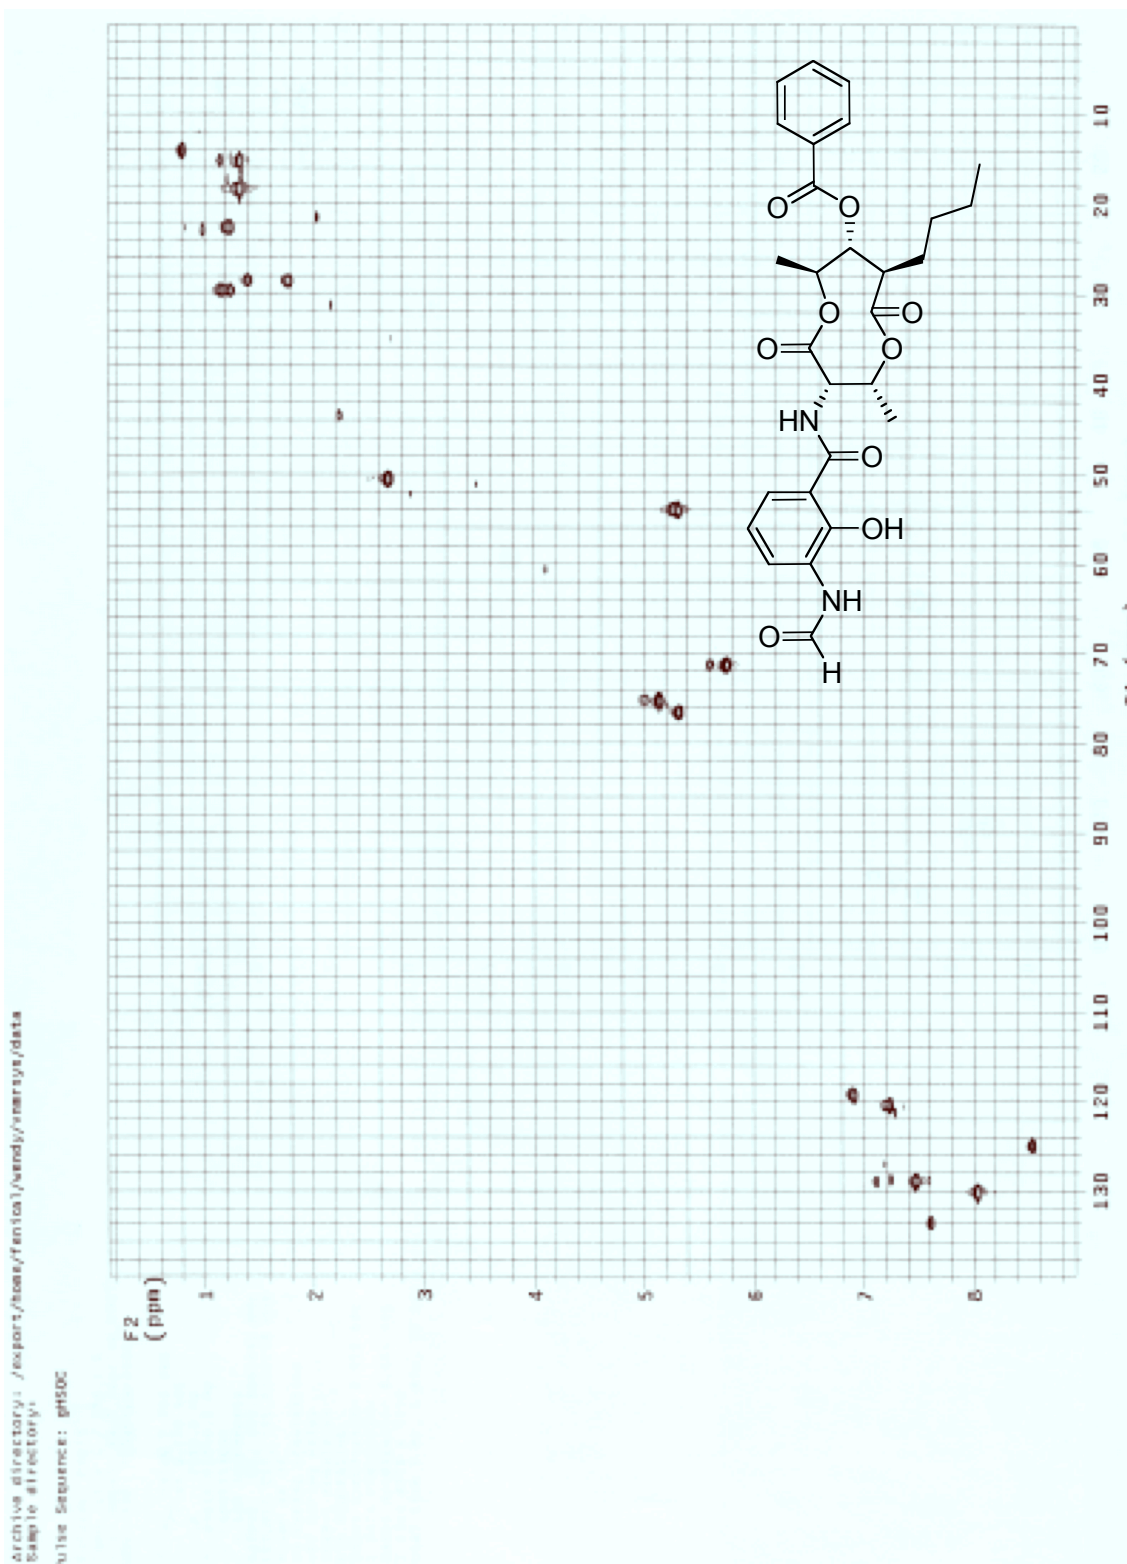

S37. gHMBC NMR spectrum of Splenocin E (5) in CDCl<sub>3</sub>.

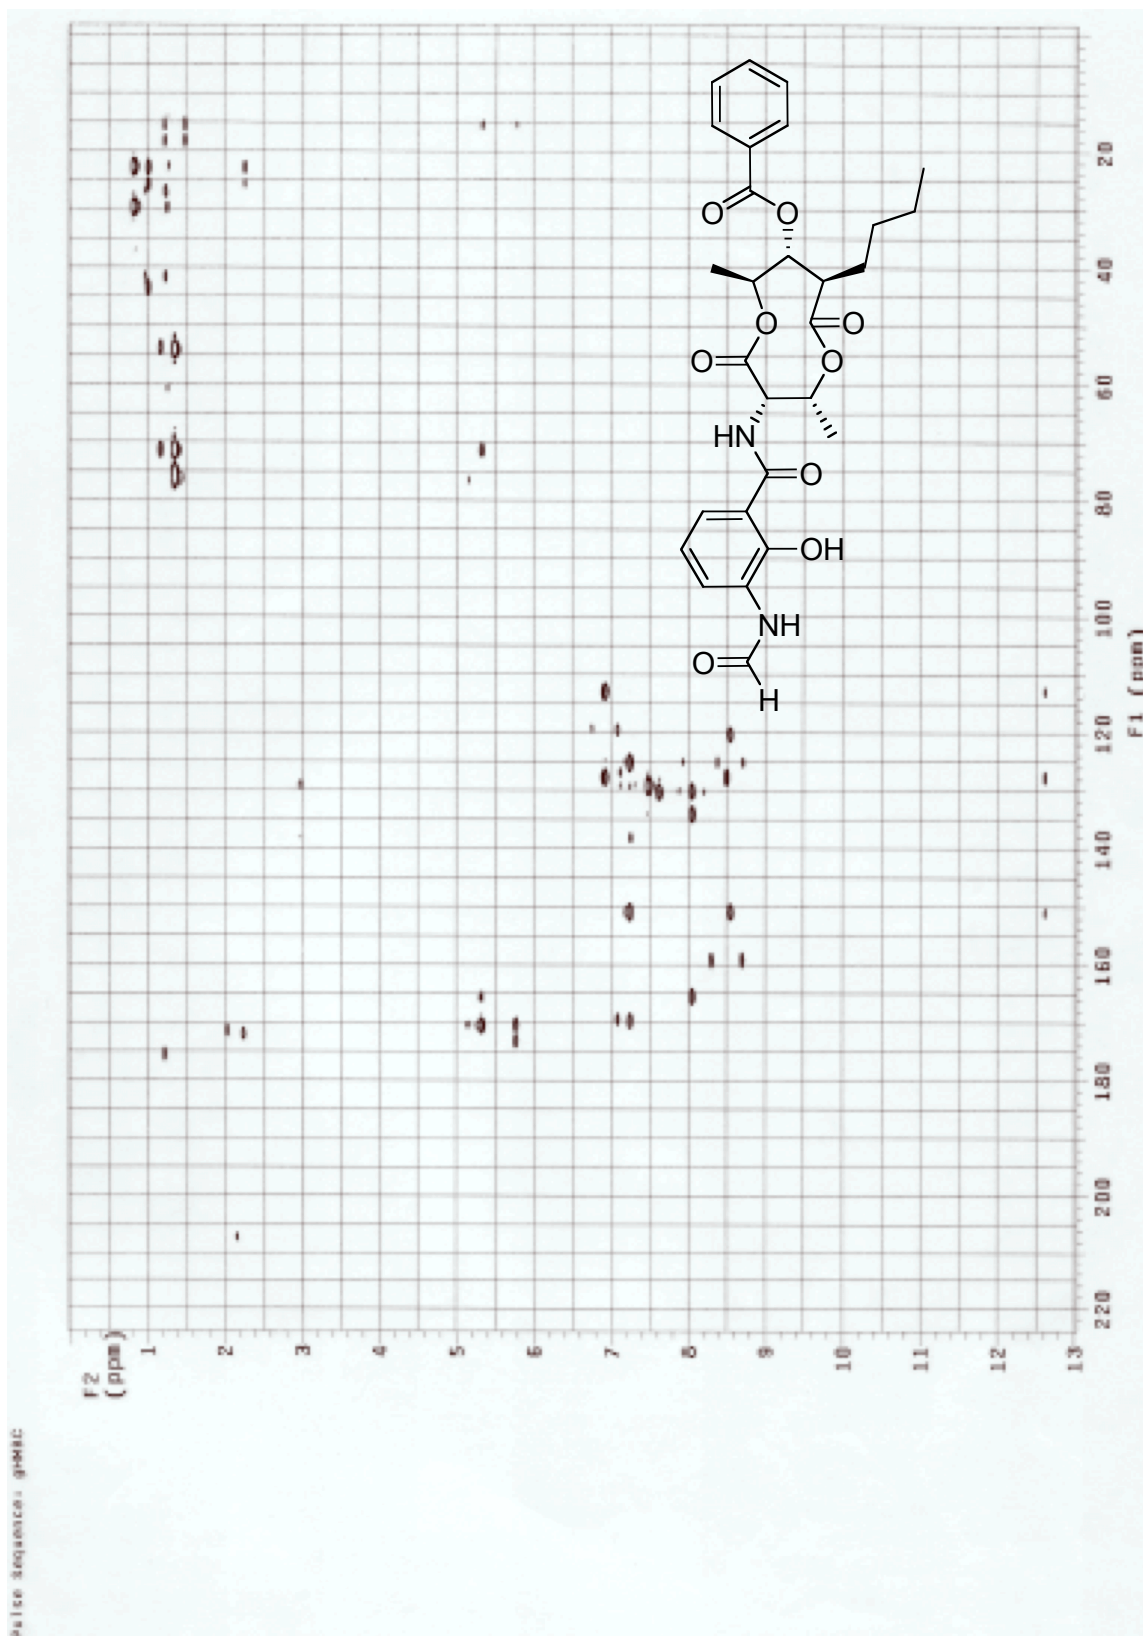



S38. UV Spectrum for Splenocin E (5) in MeCN.

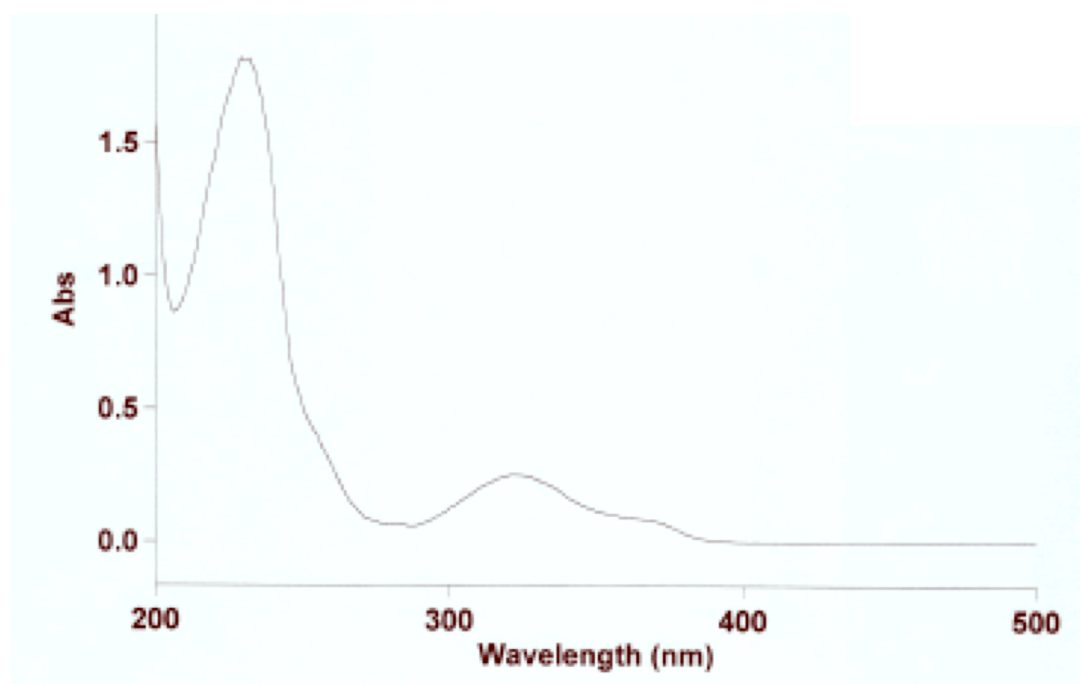

S39. LCMS Trace for Splenocin E (5).

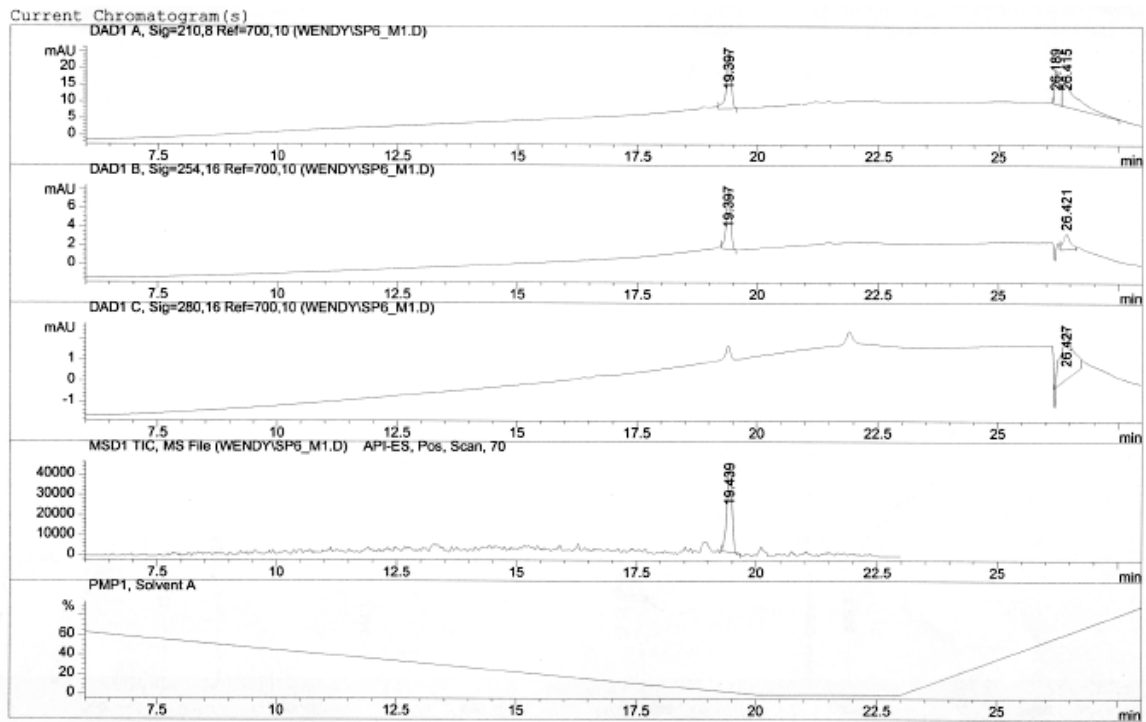

S40. HRMS for Splenocin E (5).

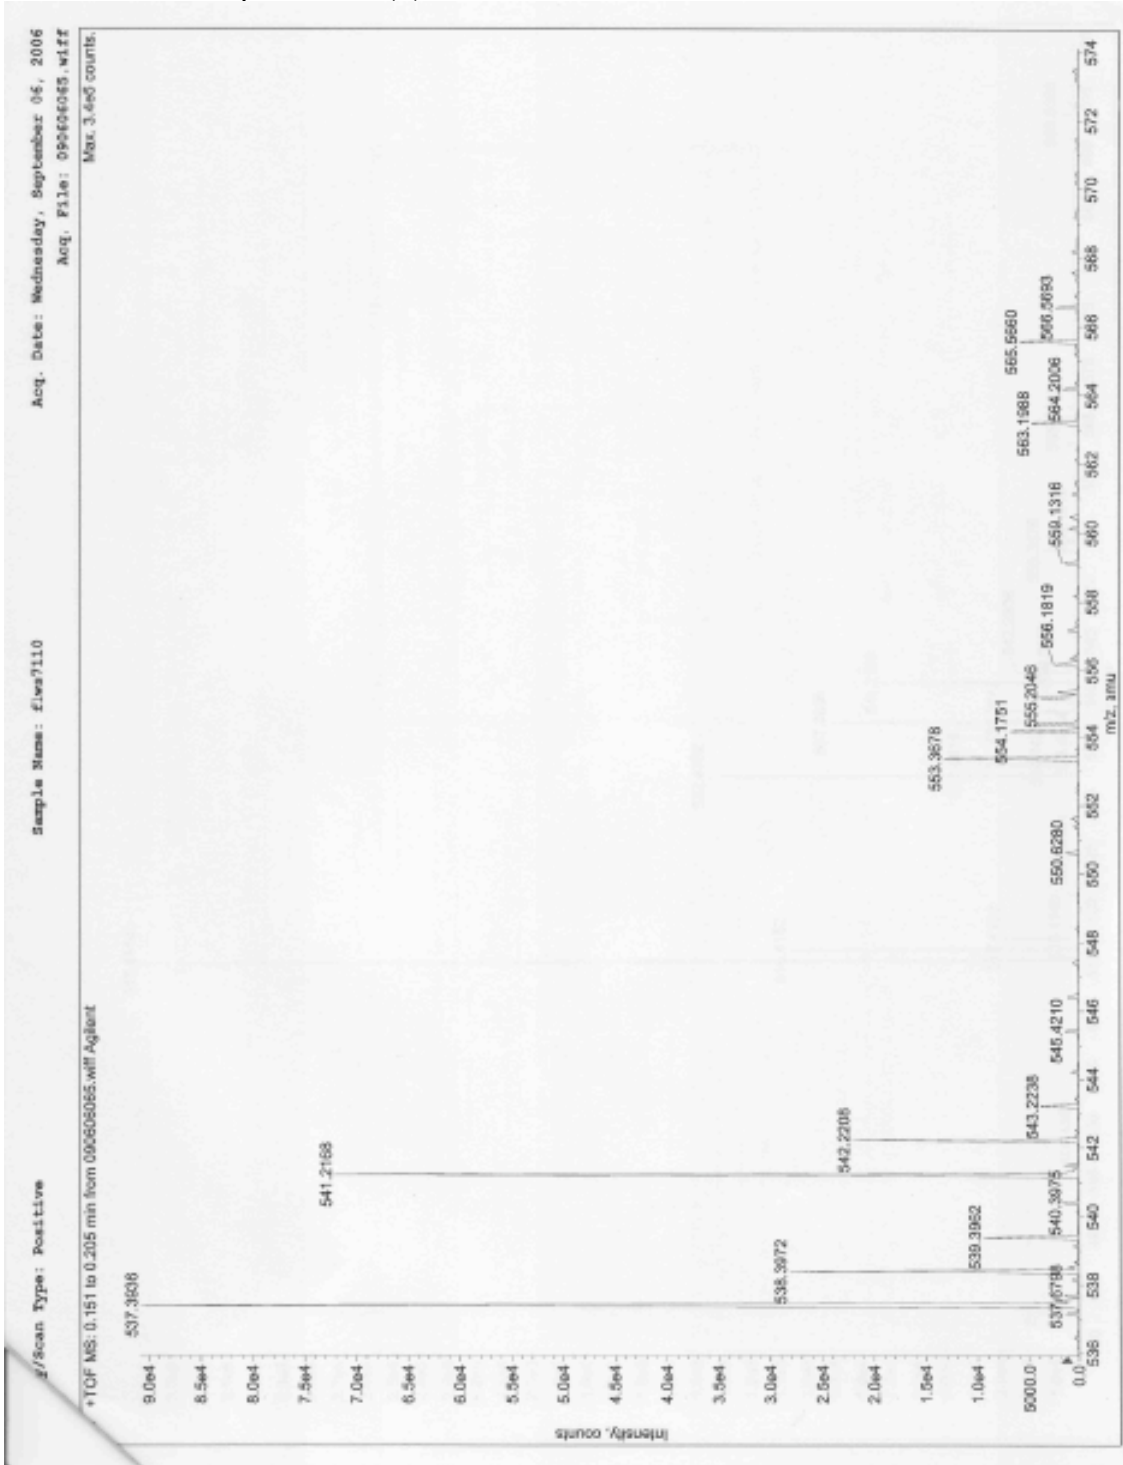

S41. <sup>1</sup>H NMR Spectrum for Splenocin F (6) in CDCl<sub>3</sub>.

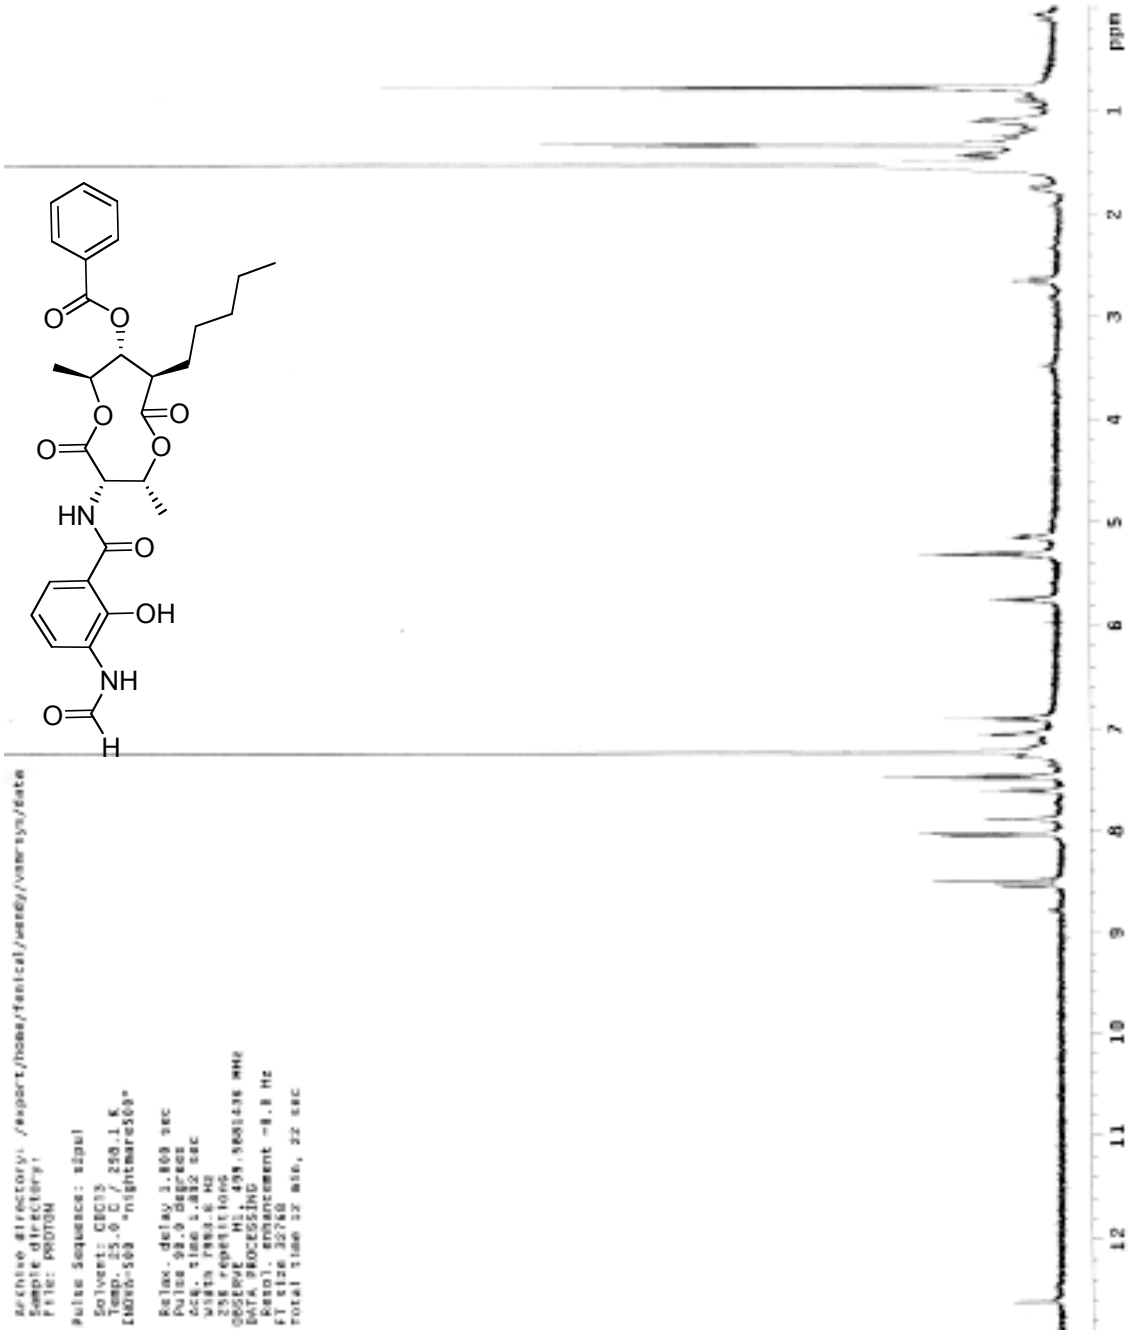

S42. gCOSY NMR spectrum in CDCl<sub>3</sub>.

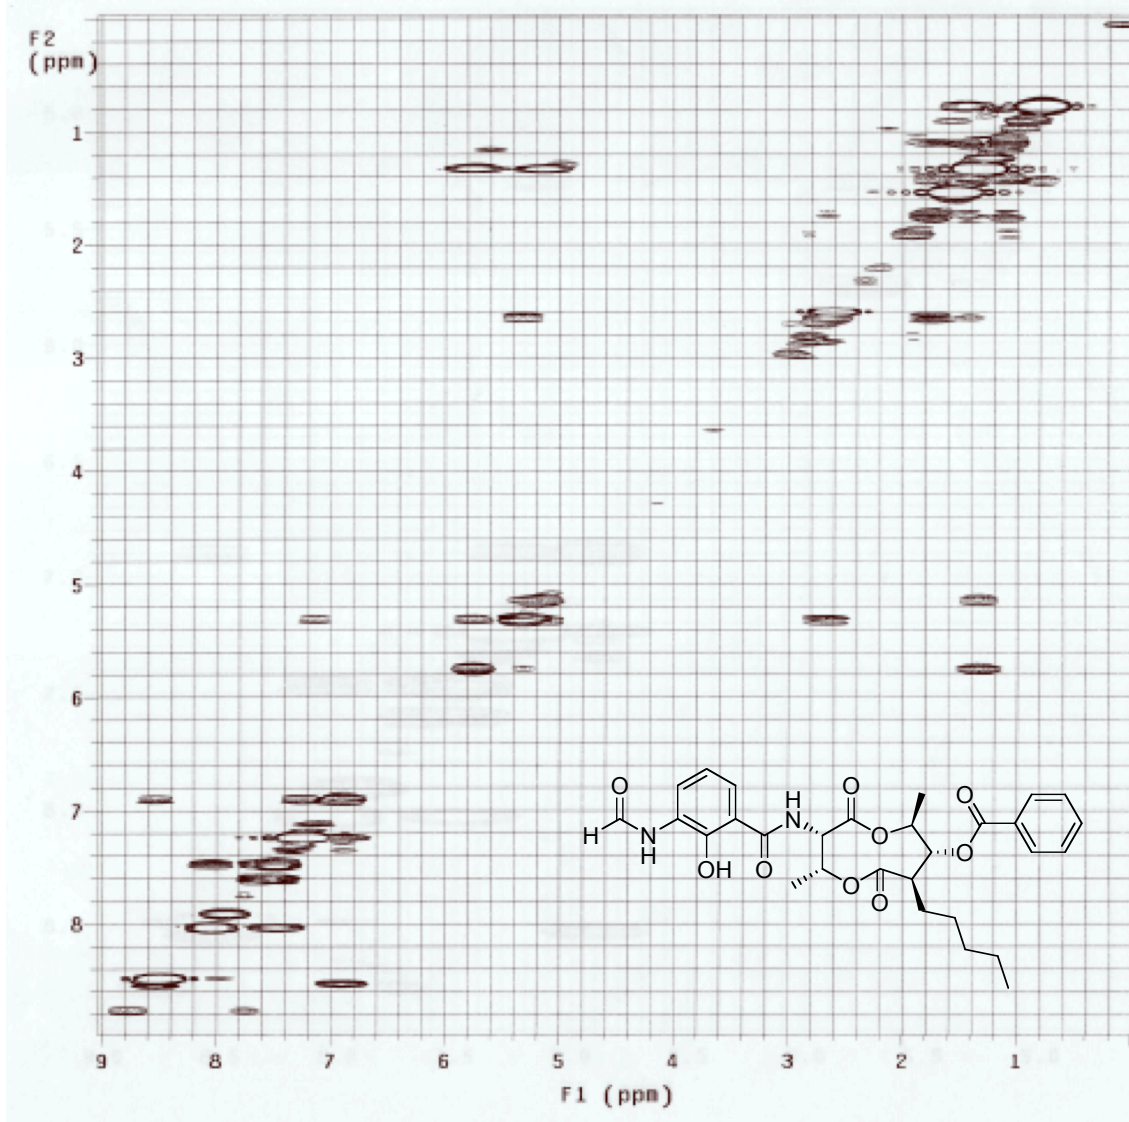

S43 gHSQC NMR Spectrum for Splenocin F (6) in CDCl<sub>3</sub>.

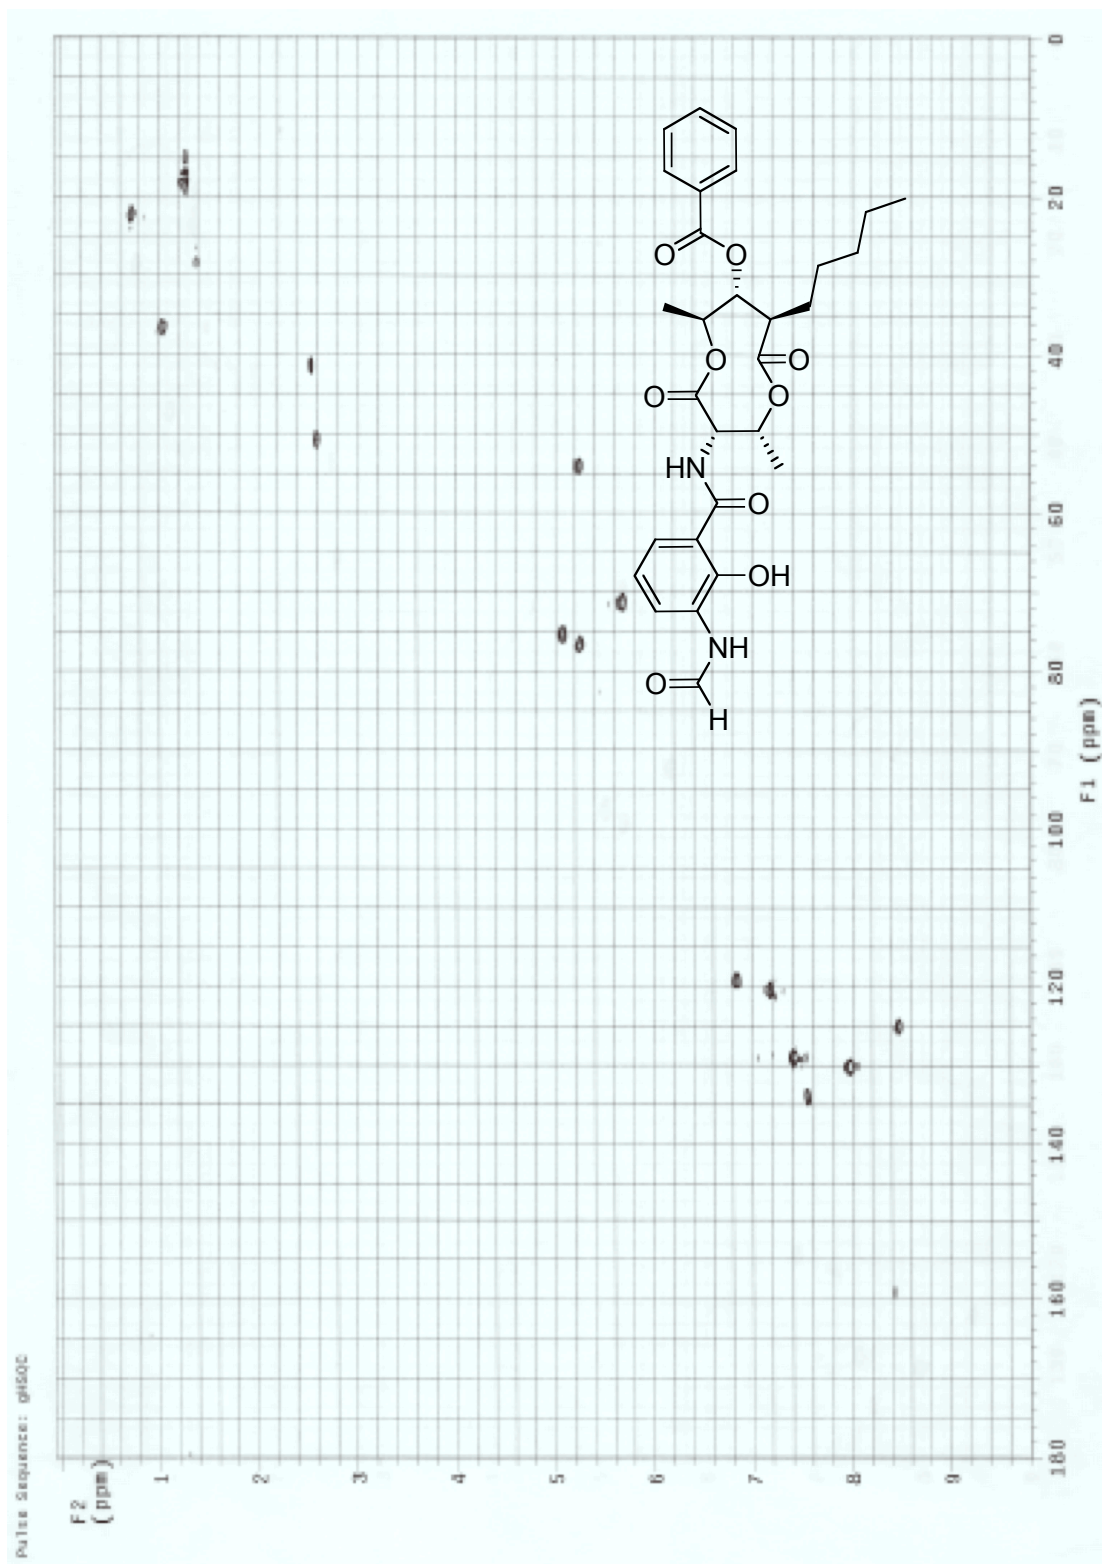

S44. HRMS for Splenocin F (6).

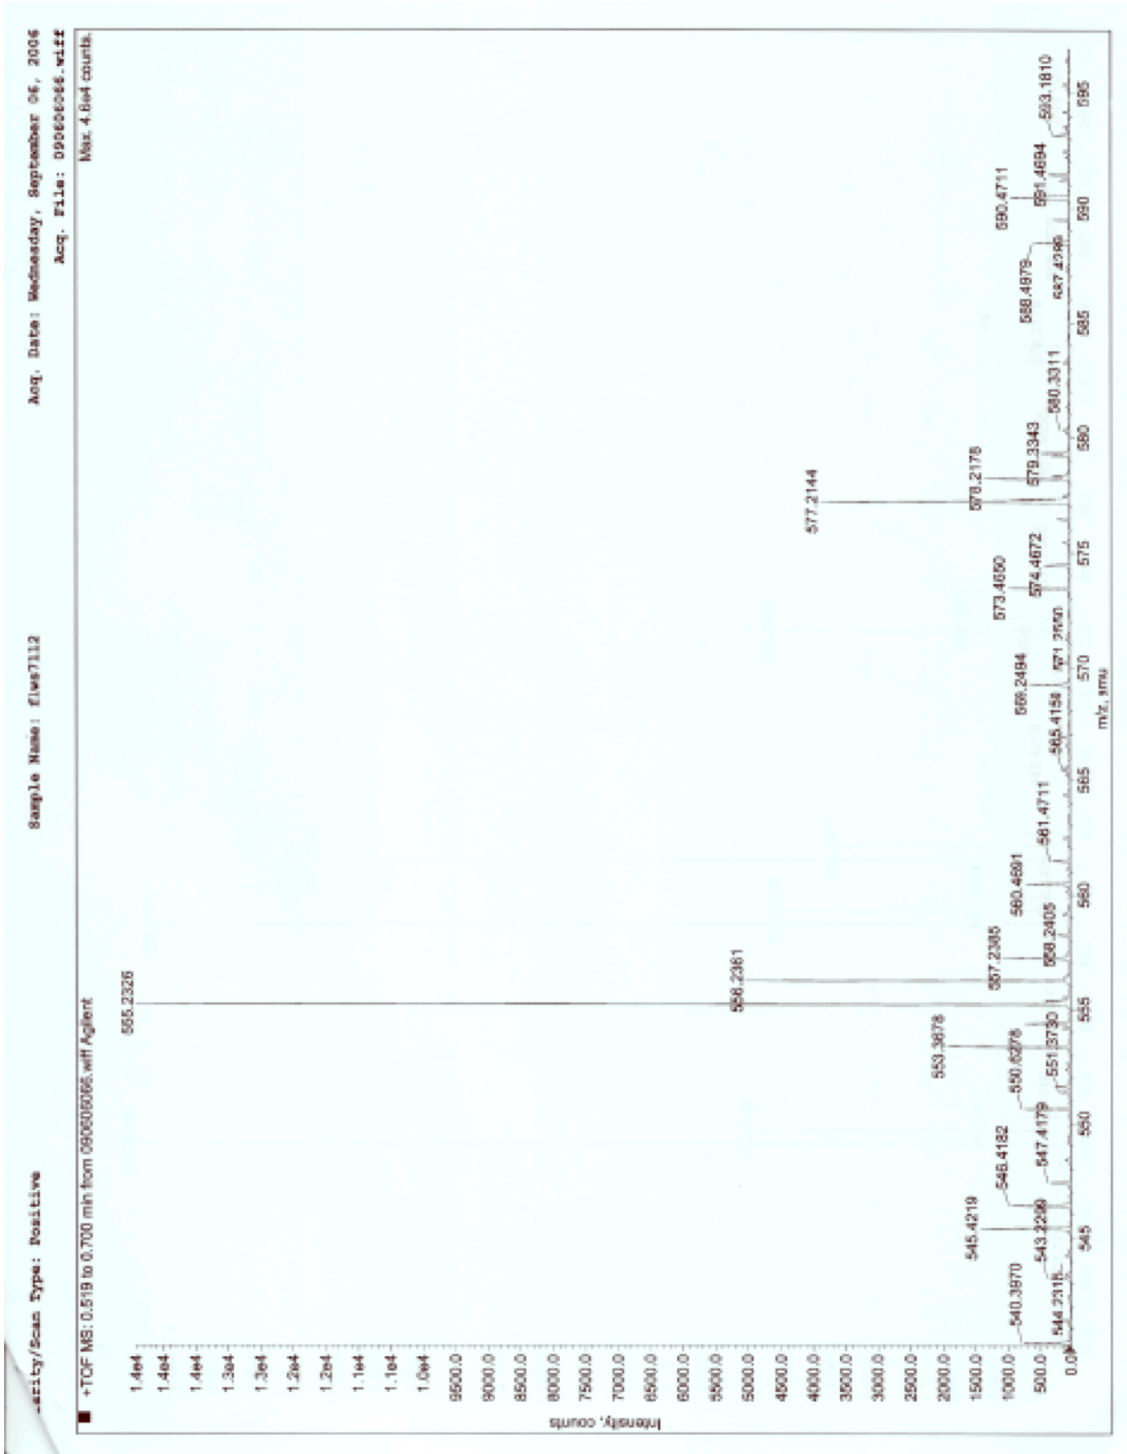

S45. UV Spectrum for Splenocin F (6) in MeCN

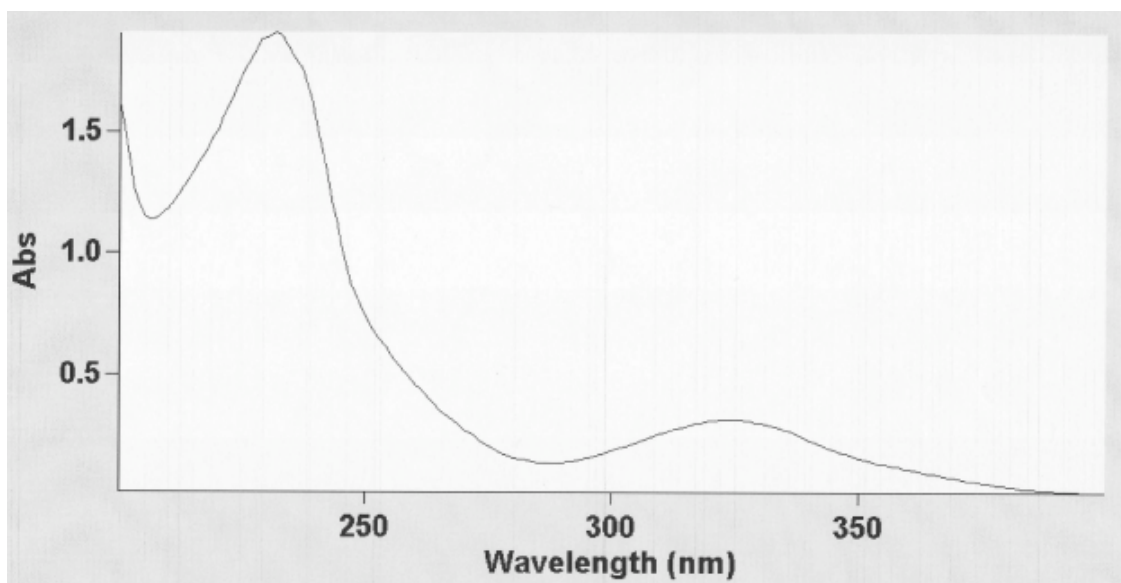



S46. LCMS Trace for Splenocin F (6).

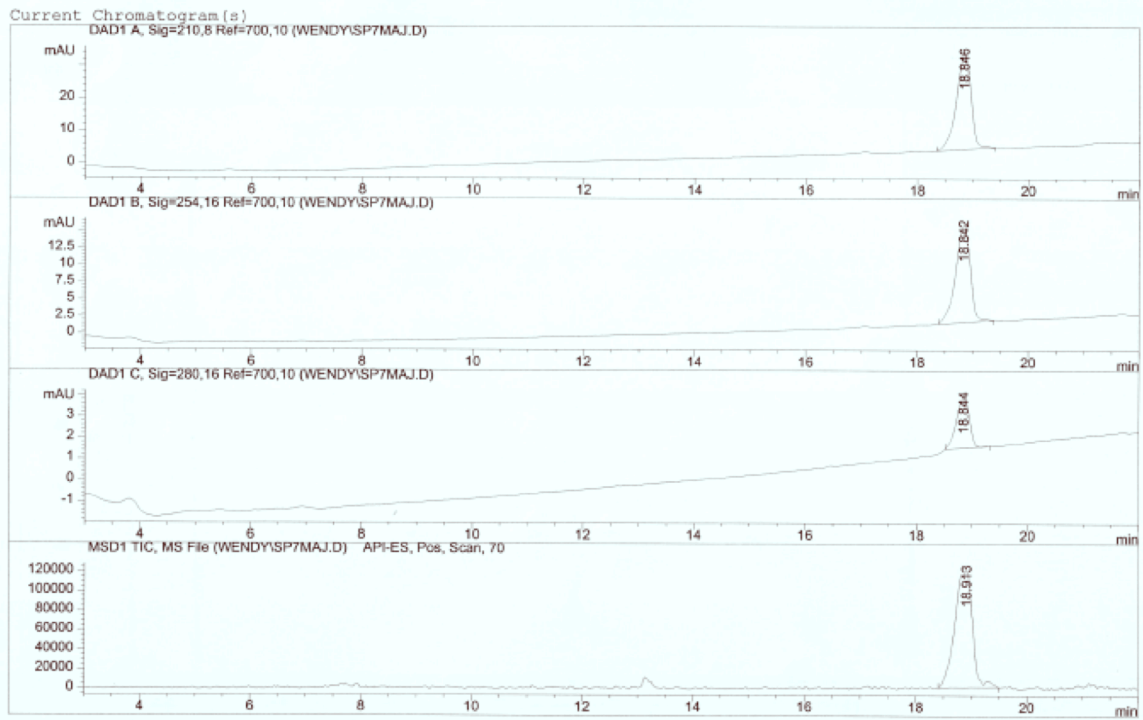

S47.  $^1\text{H}$  NMR Spectrum for Splenocin G (7) in  $\text{CDCl}_3$ .

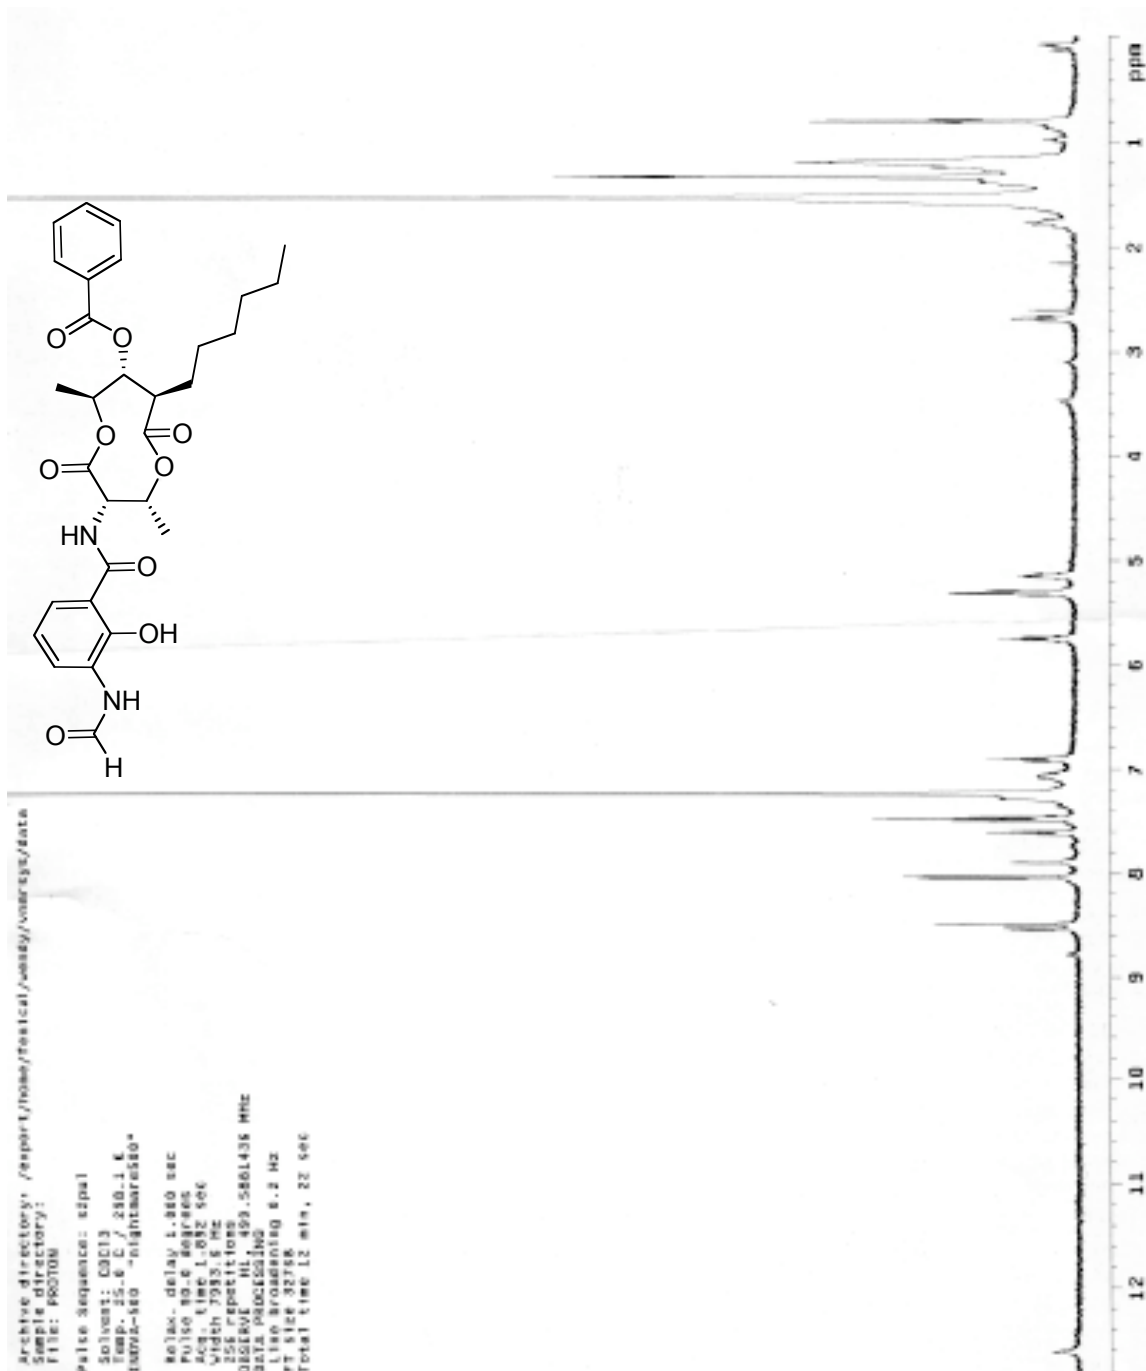

S48.  $^{13}\text{C}$  NMR Spectrum for Splenocin G (7) in  $\text{CDCl}_3$ .

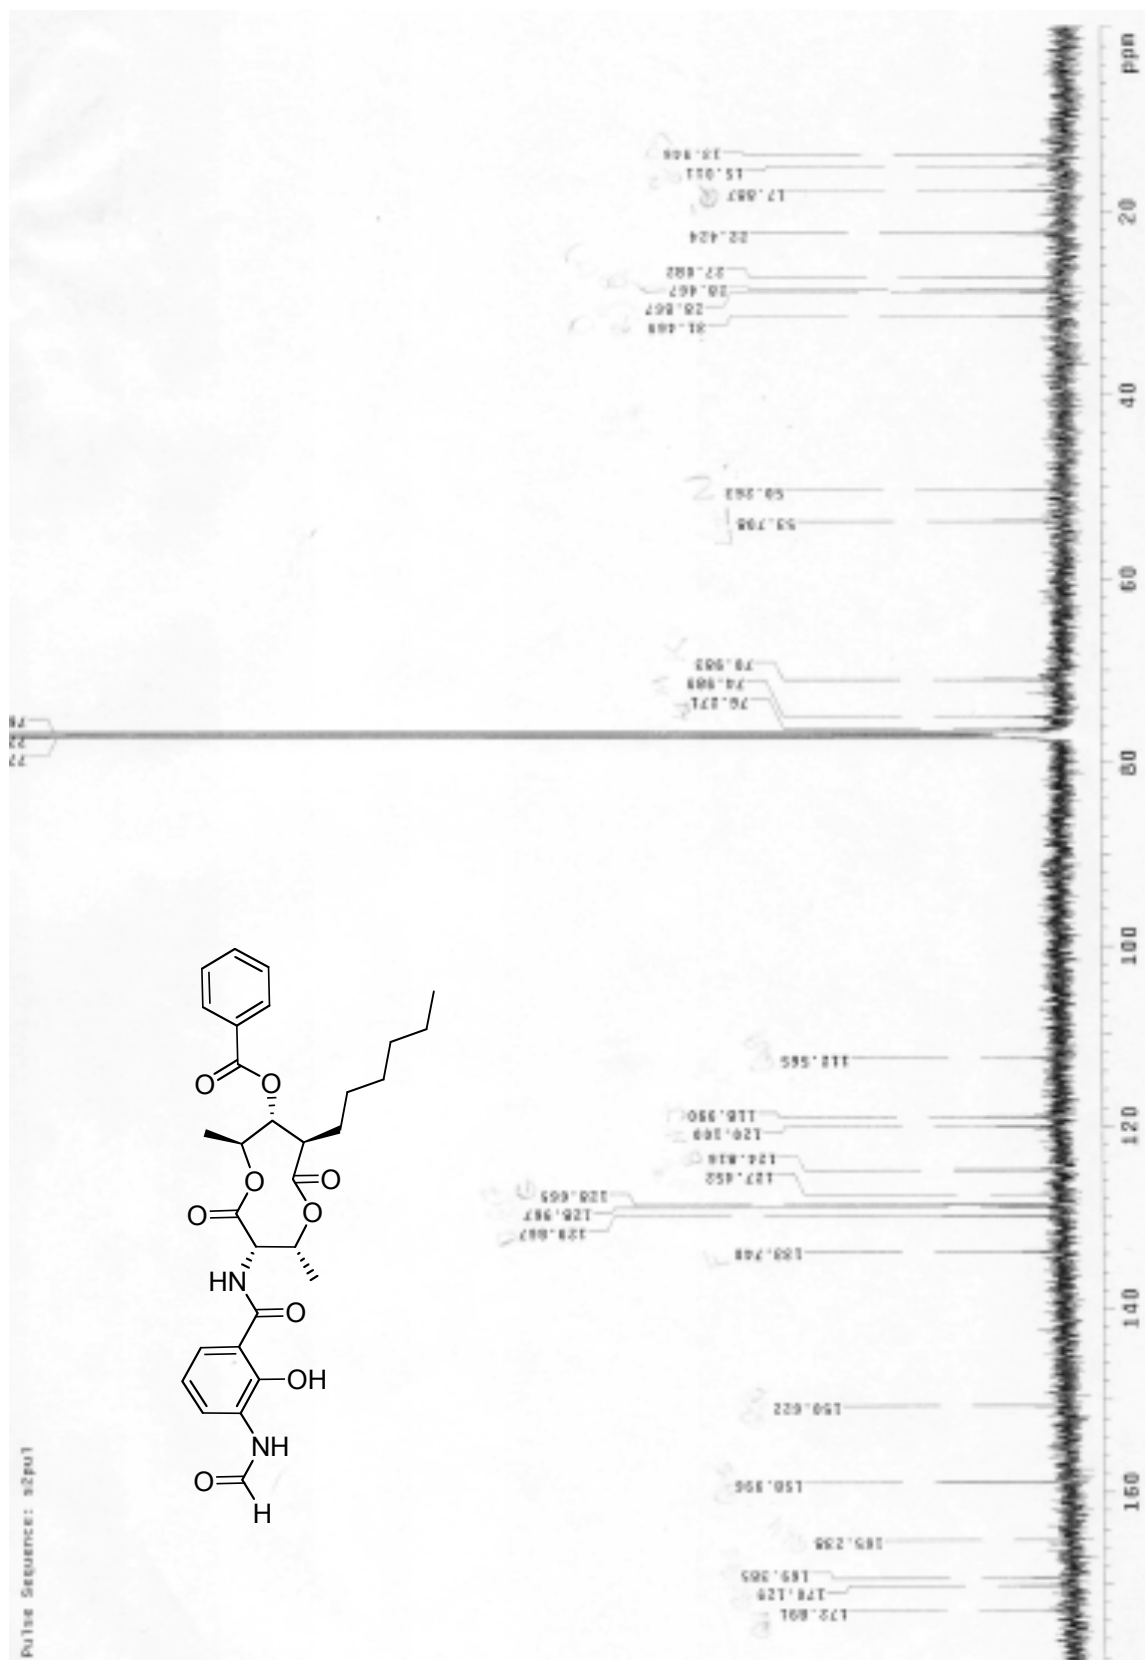

S49. gCOSY NMR Spectrum for Splenocin G (7) in CDCl<sub>3</sub>.

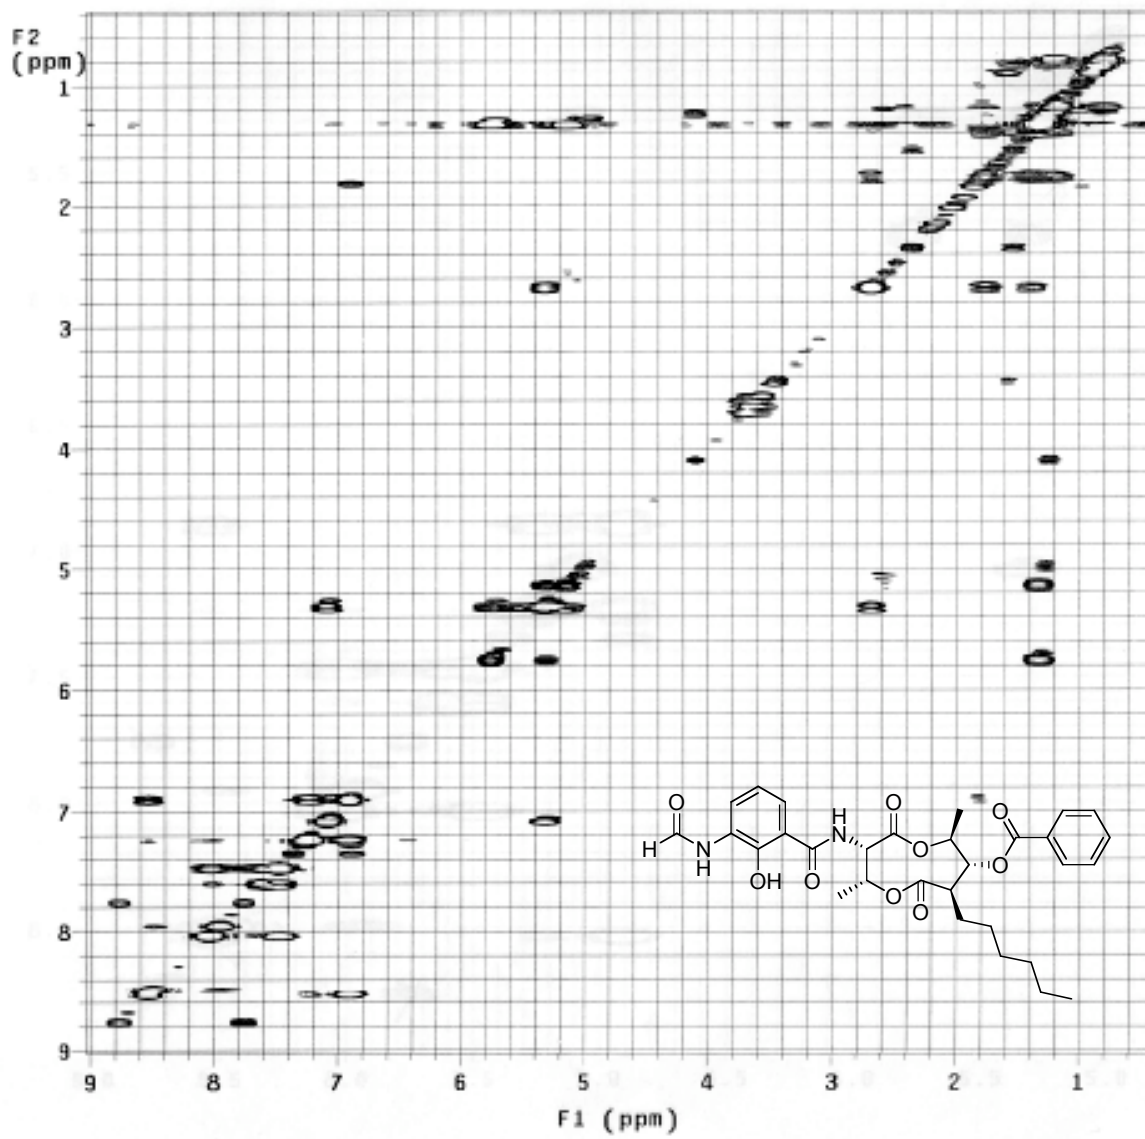

S50. gHSQC NMR Spectrum for Splenocin G (7) in CDCl<sub>3</sub>.

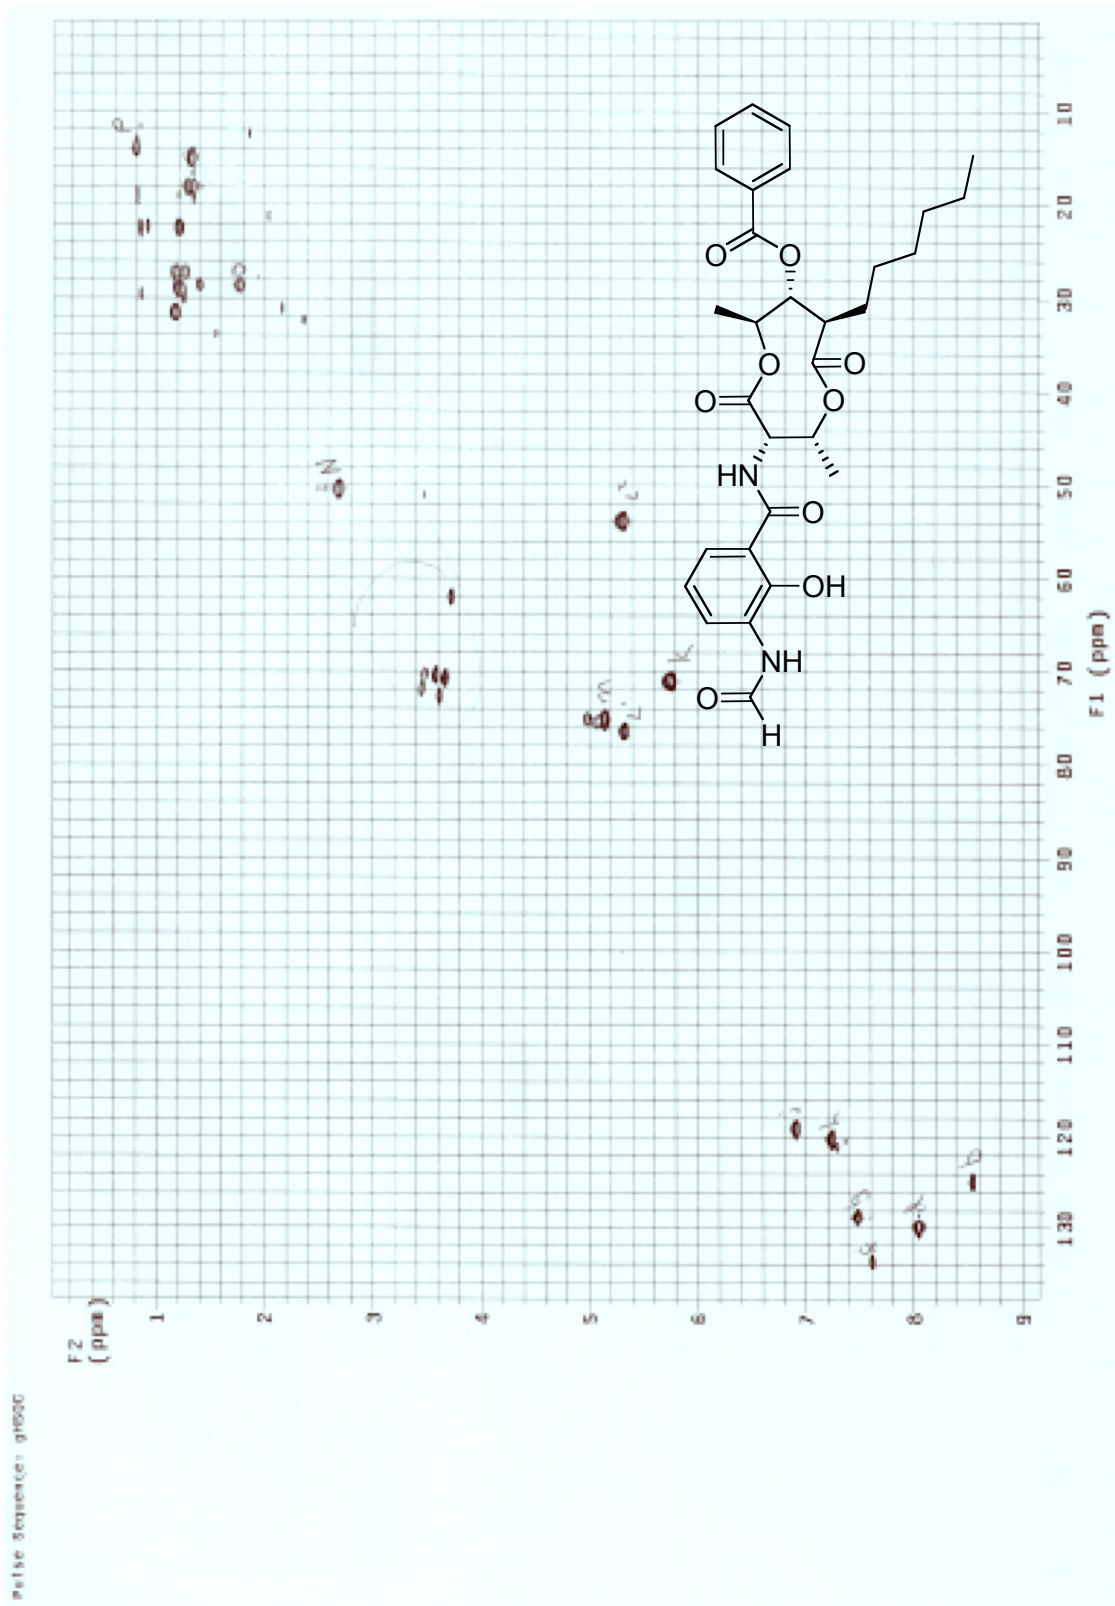

S51. gHMBC NMR Spectrum for Splenocin G (7) in CDCl<sub>3</sub>.

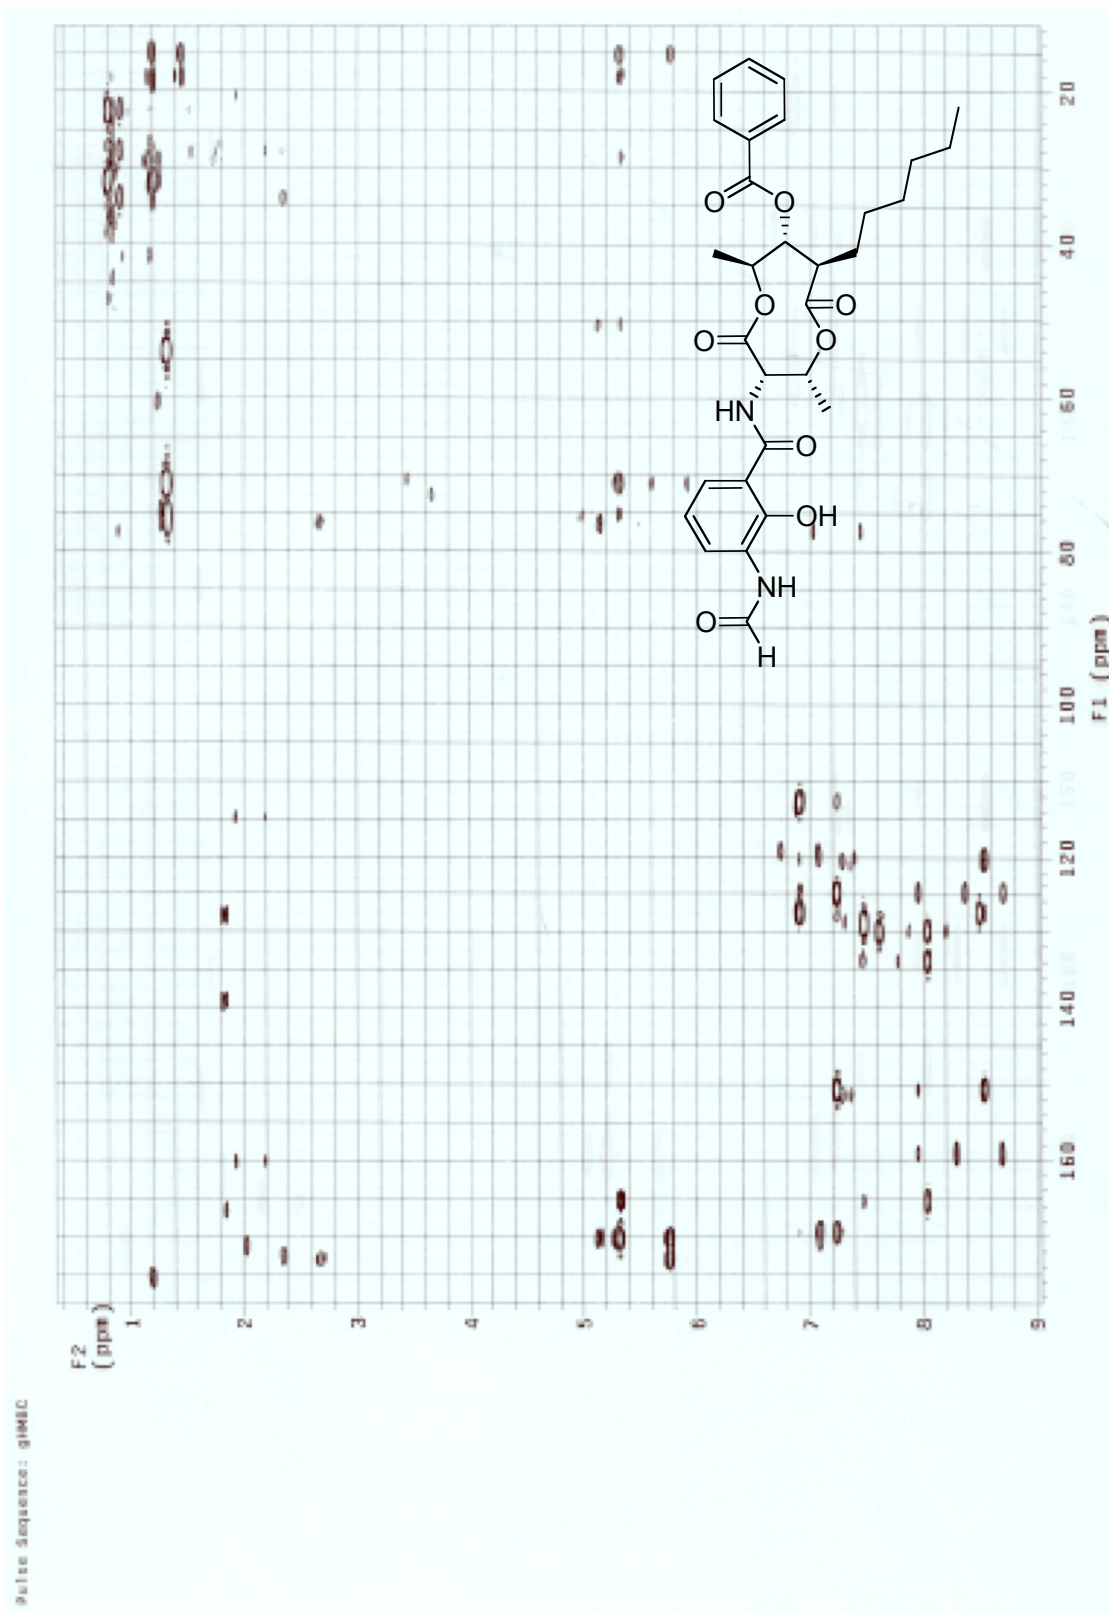

S52. HRMS for Splenocin G (7)

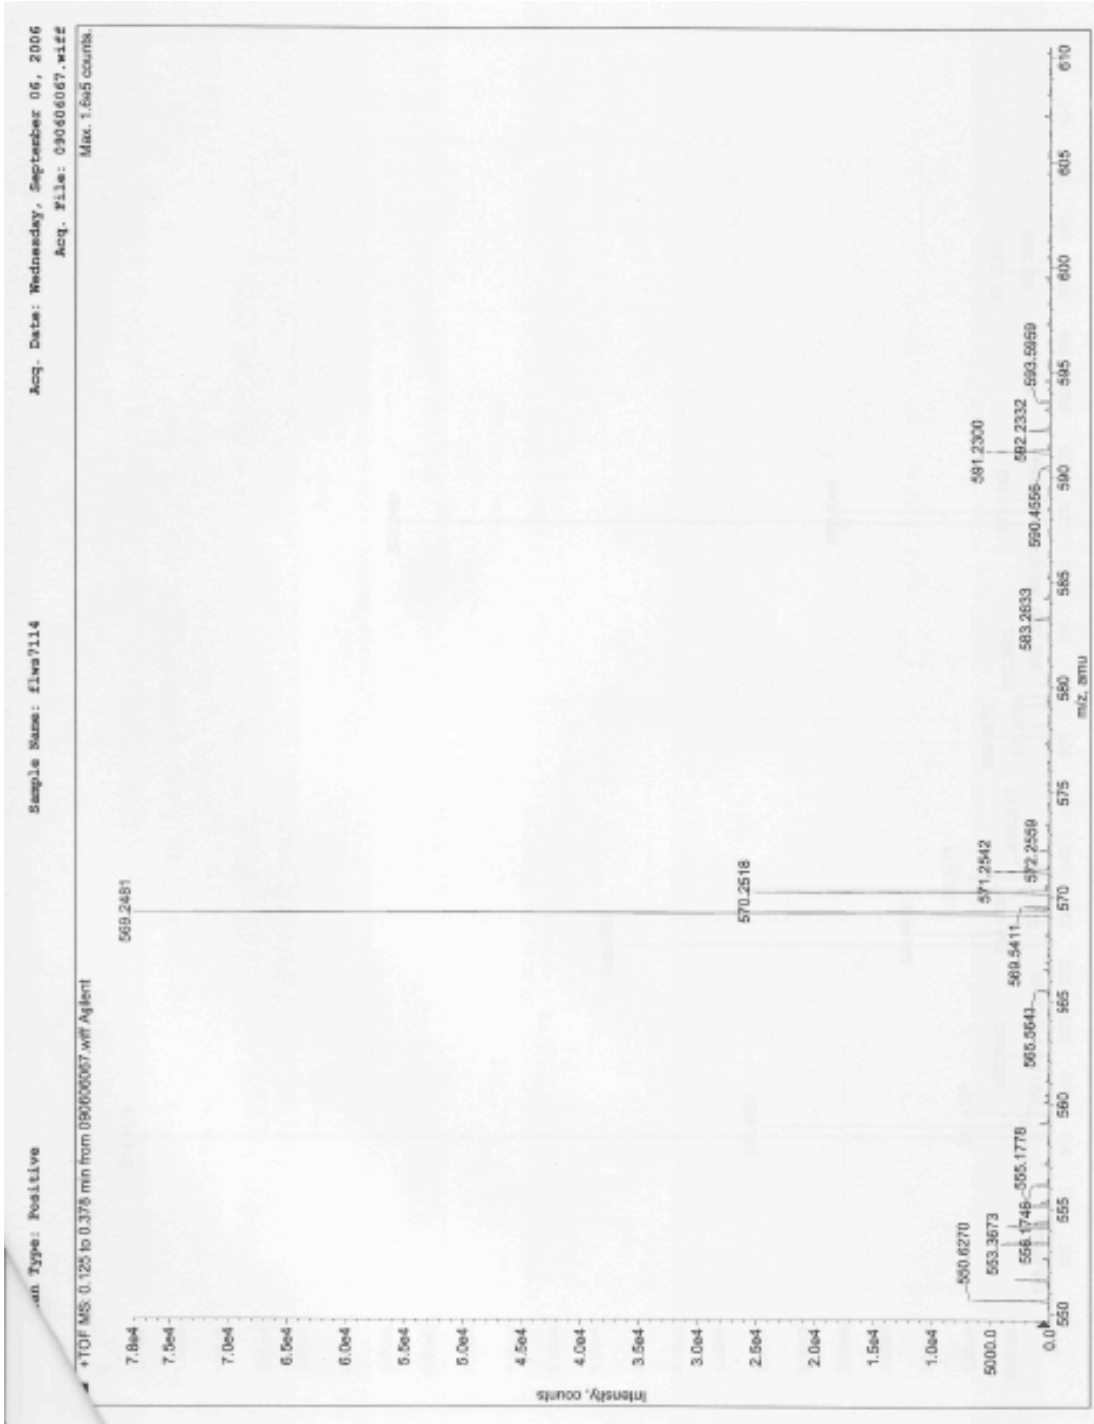

S53. UV Spectrum for Splenocin G(7) in MeCN.

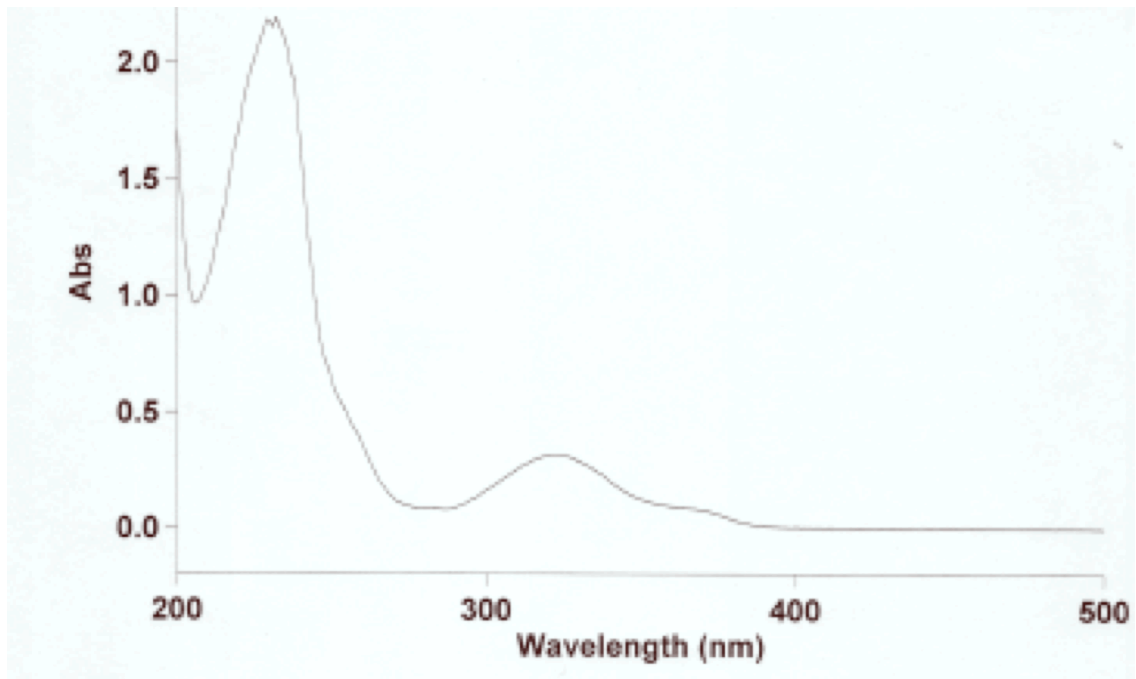



S54. LCMS Trace for Splenocin G (7).

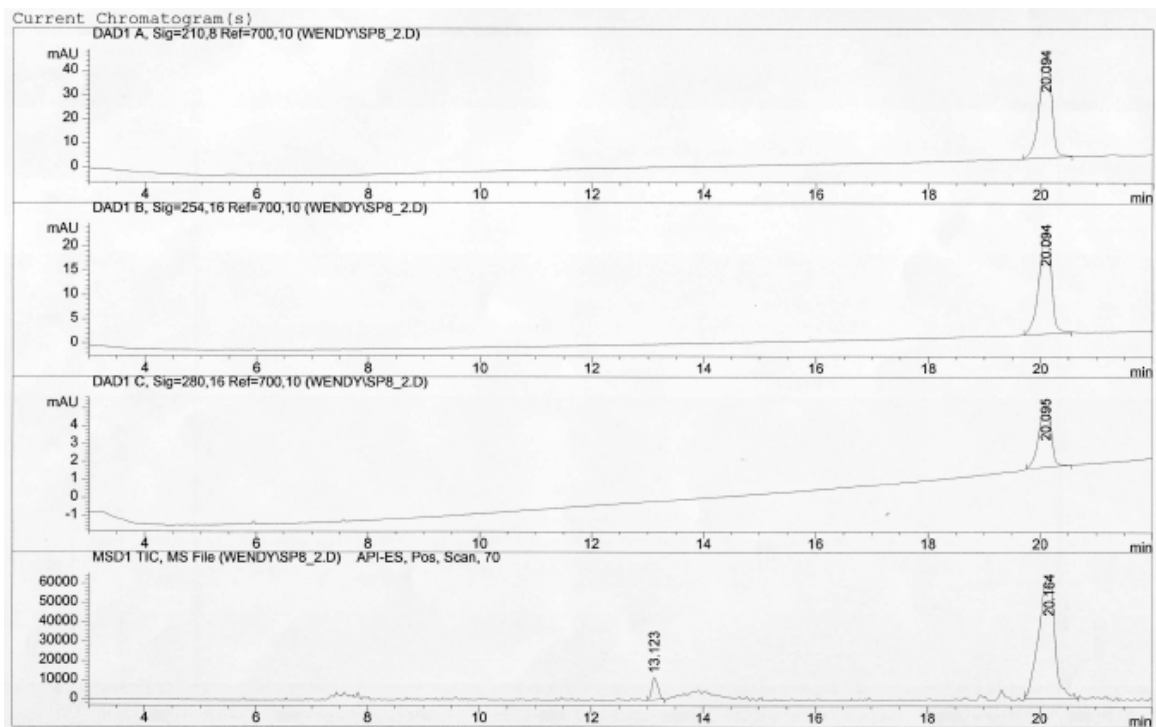

S55.  $^1\text{H}$  NMR Spectrum for Splenocin H (**8**) in  $\text{CDCl}_3$ .

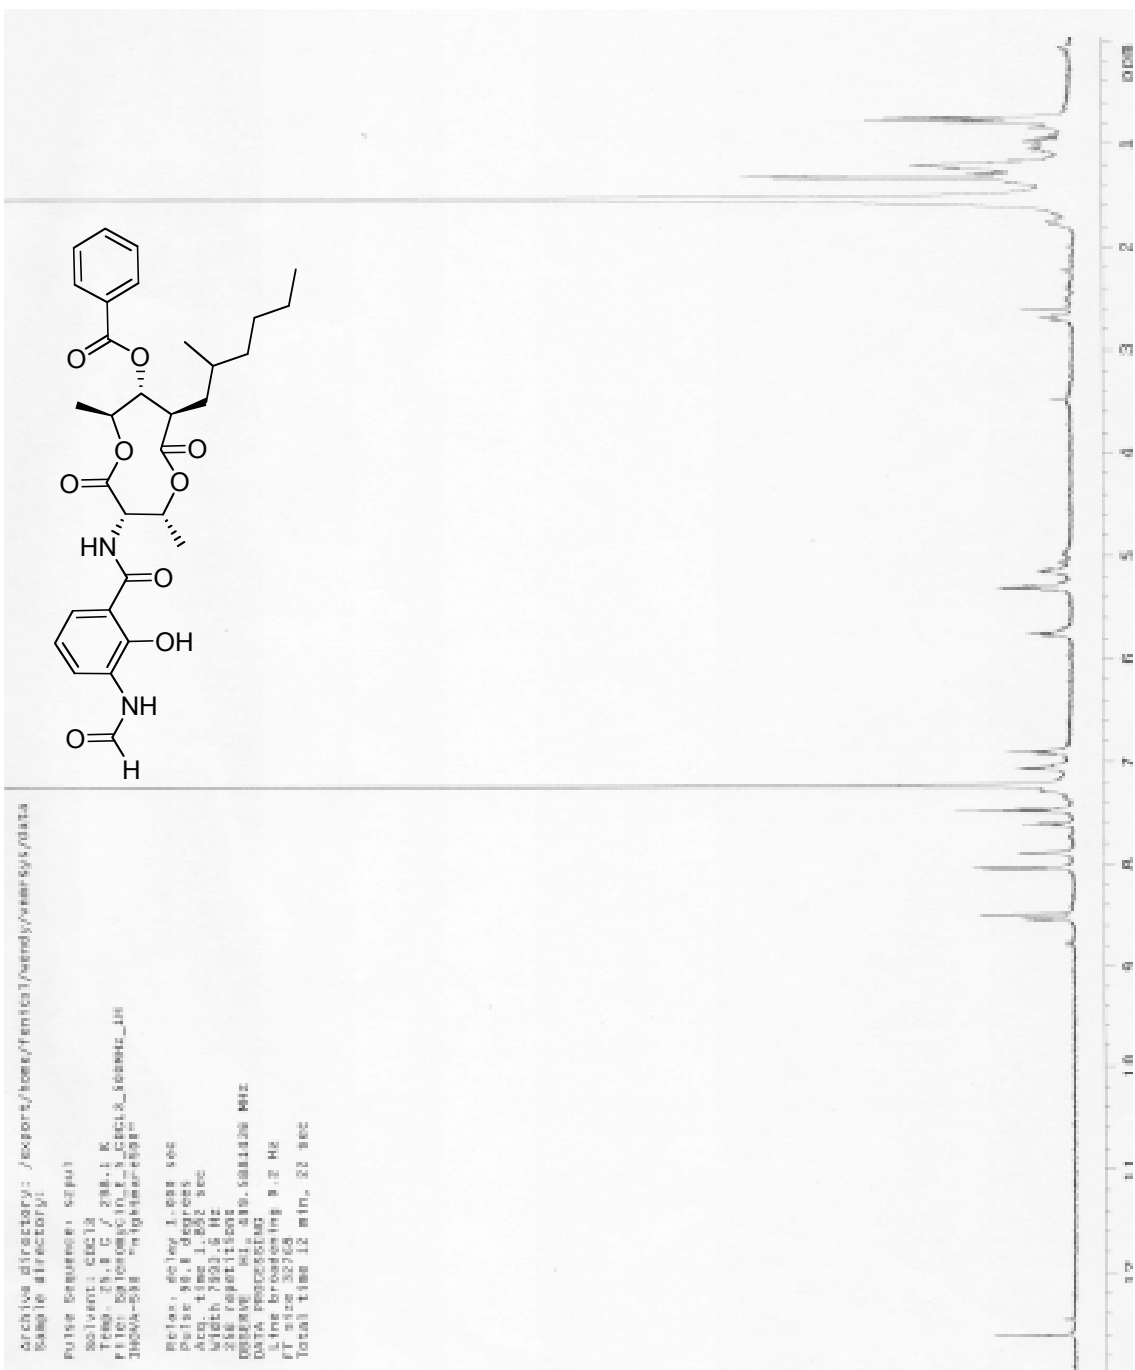

S56. gCOSY NMR Spectrum for Splenocin H (**8**) in CDCl<sub>3</sub>.

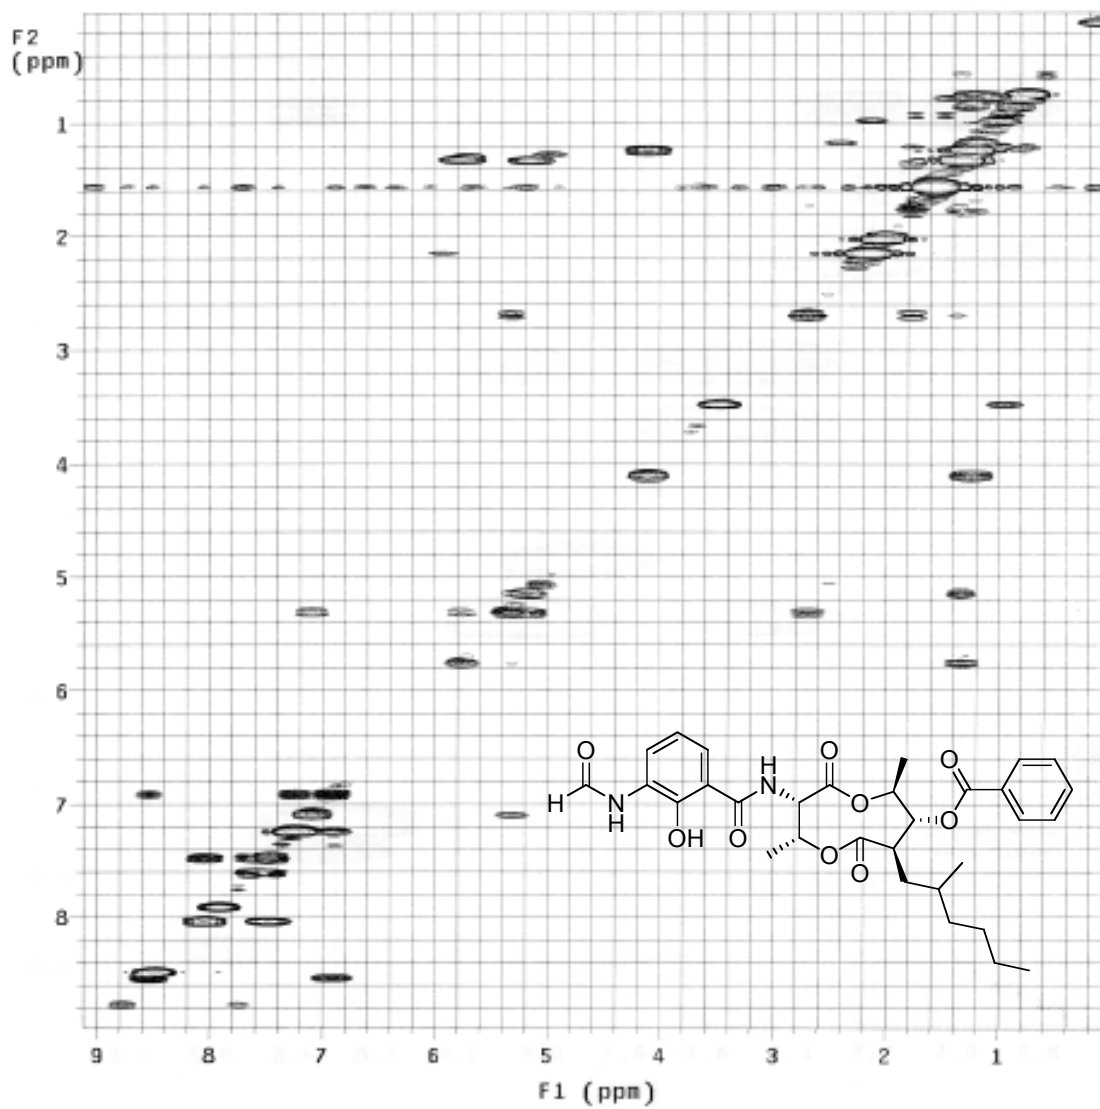

S57. gHSQC NMR Spectrum for Splenocin H (8) in CDCl<sub>3</sub>.

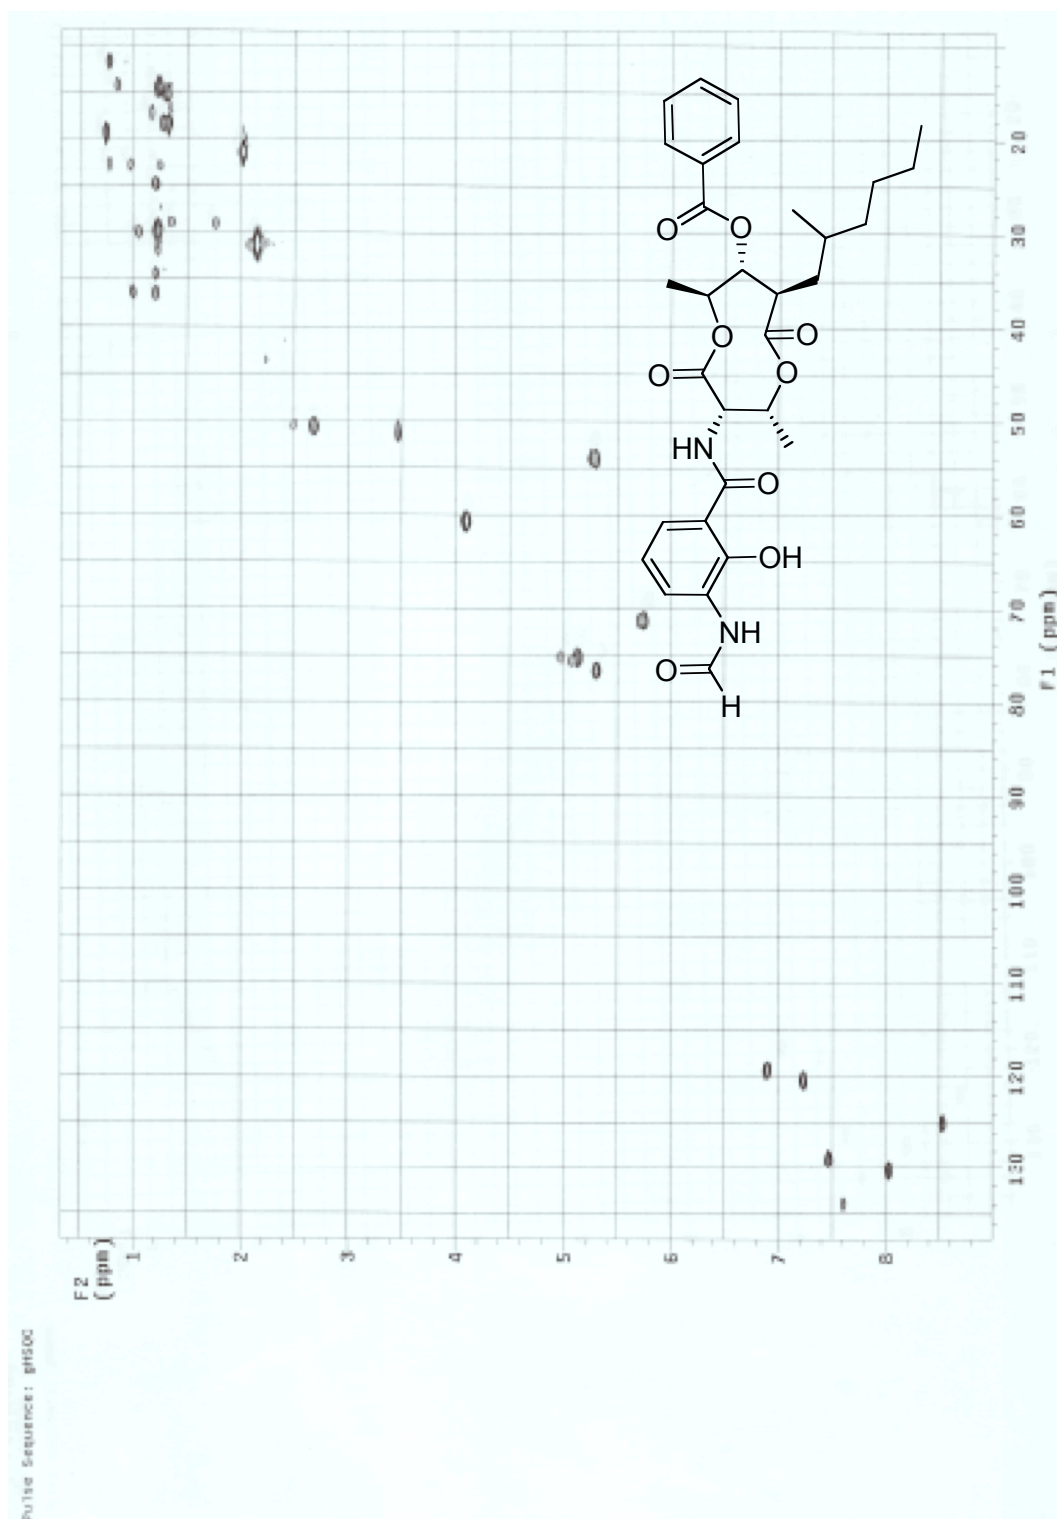

S58. gHMBC NMR Spectrum for Splenocin H (**8**) in CDCl<sub>3</sub>.

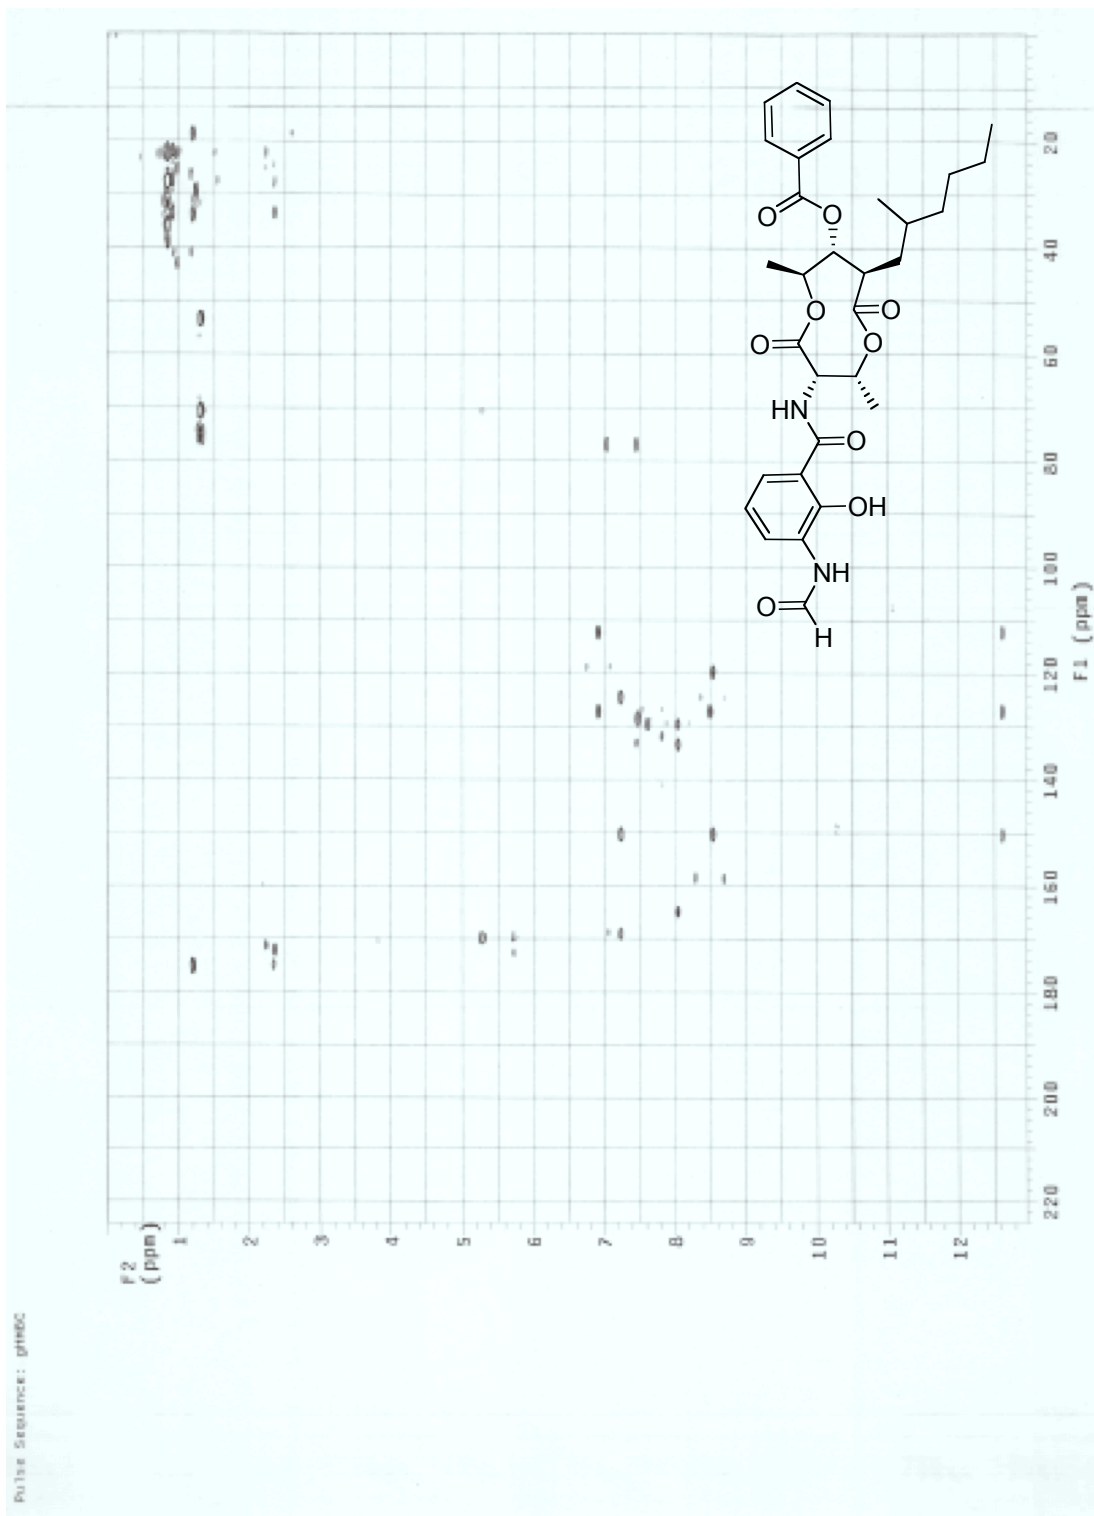

S59. HRMS for Splenocin H (8)

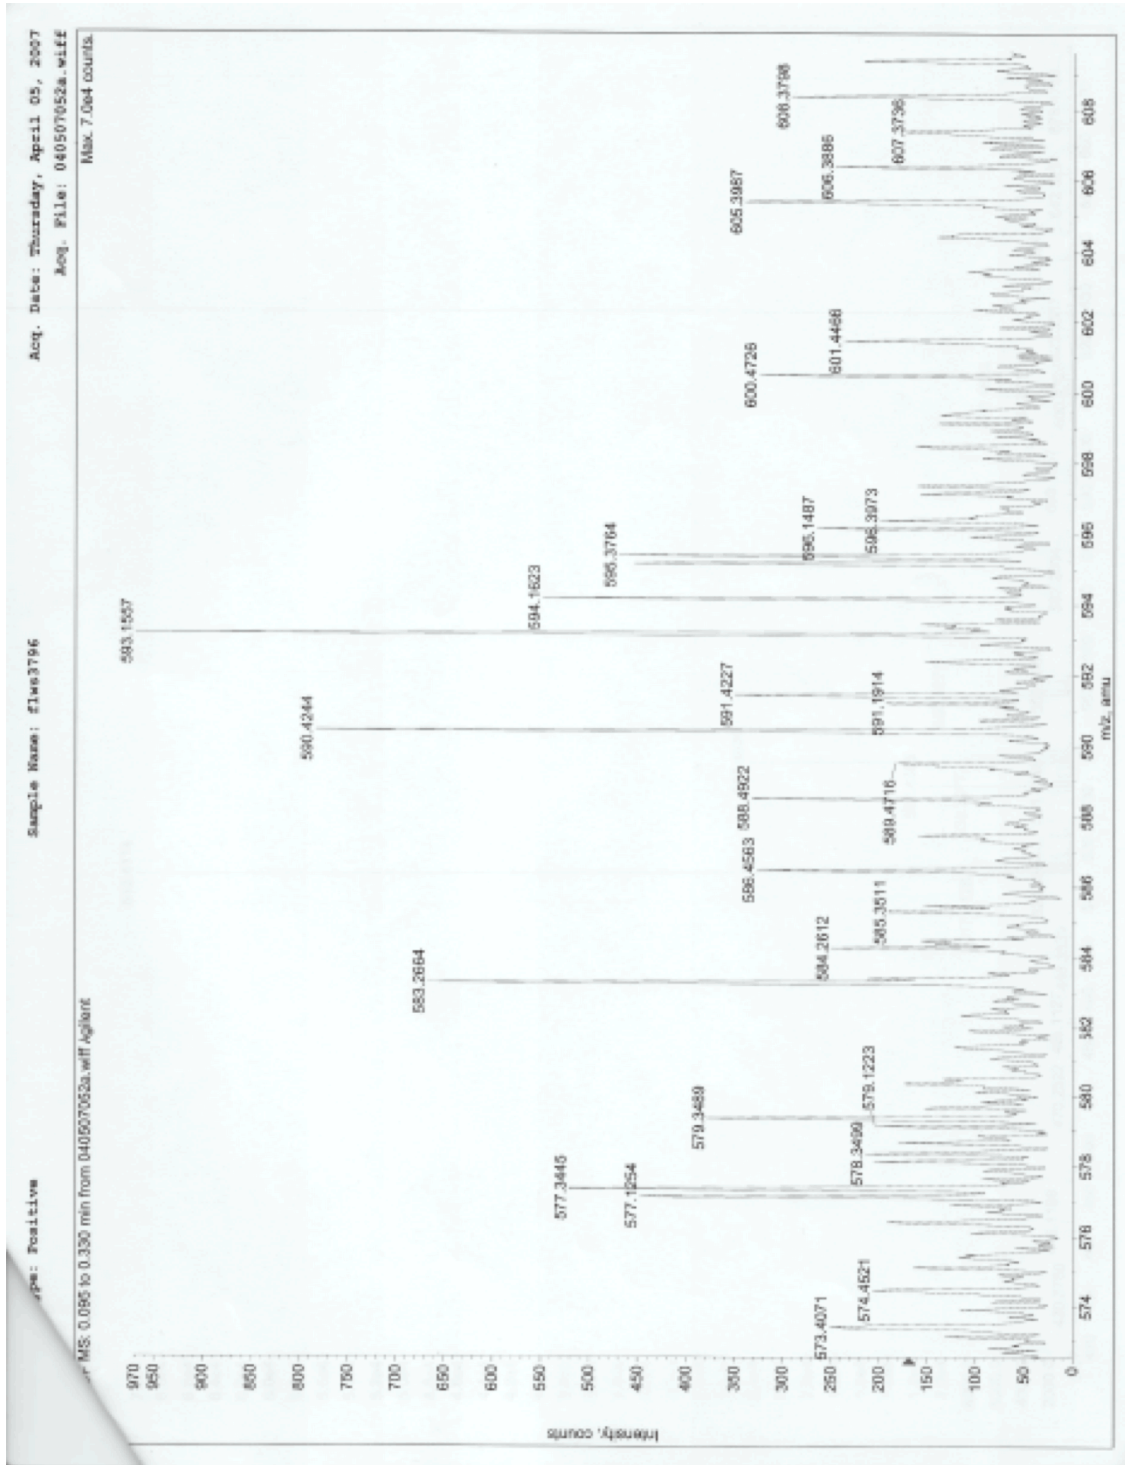

S60. LCMS Trace for Splenocin H (8).

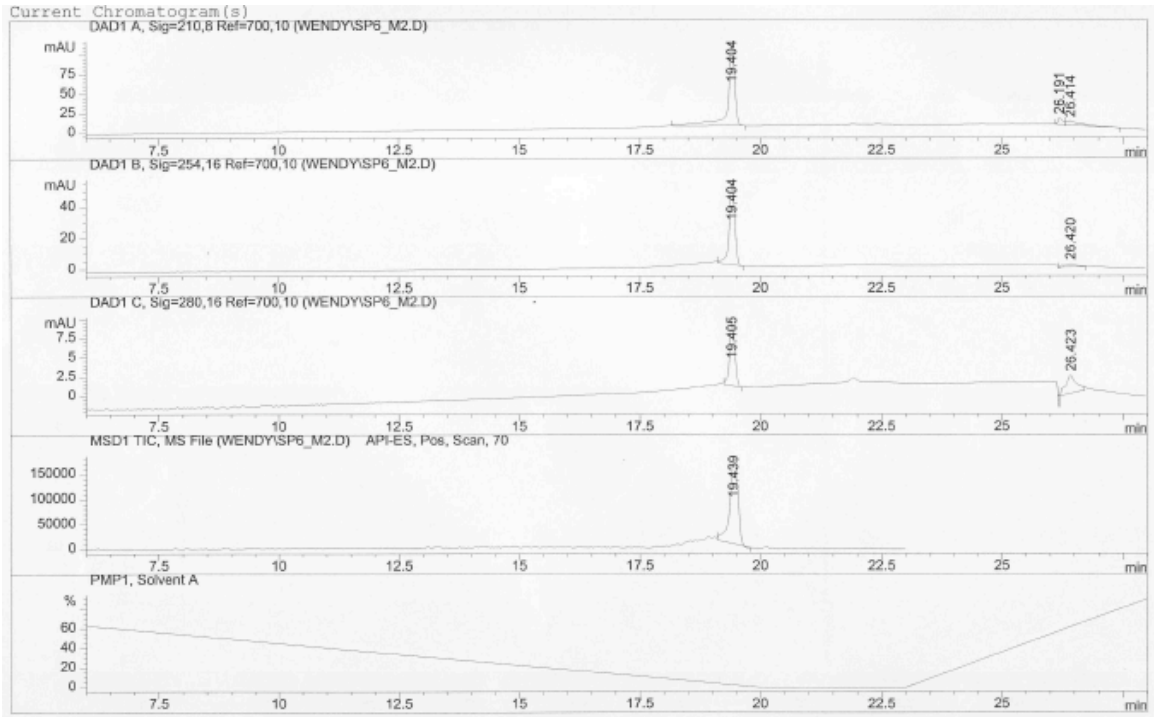

S61.  $^1\text{H}$  NMR Spectrum for Splenocin I (9) in  $\text{CDCl}_3$ .

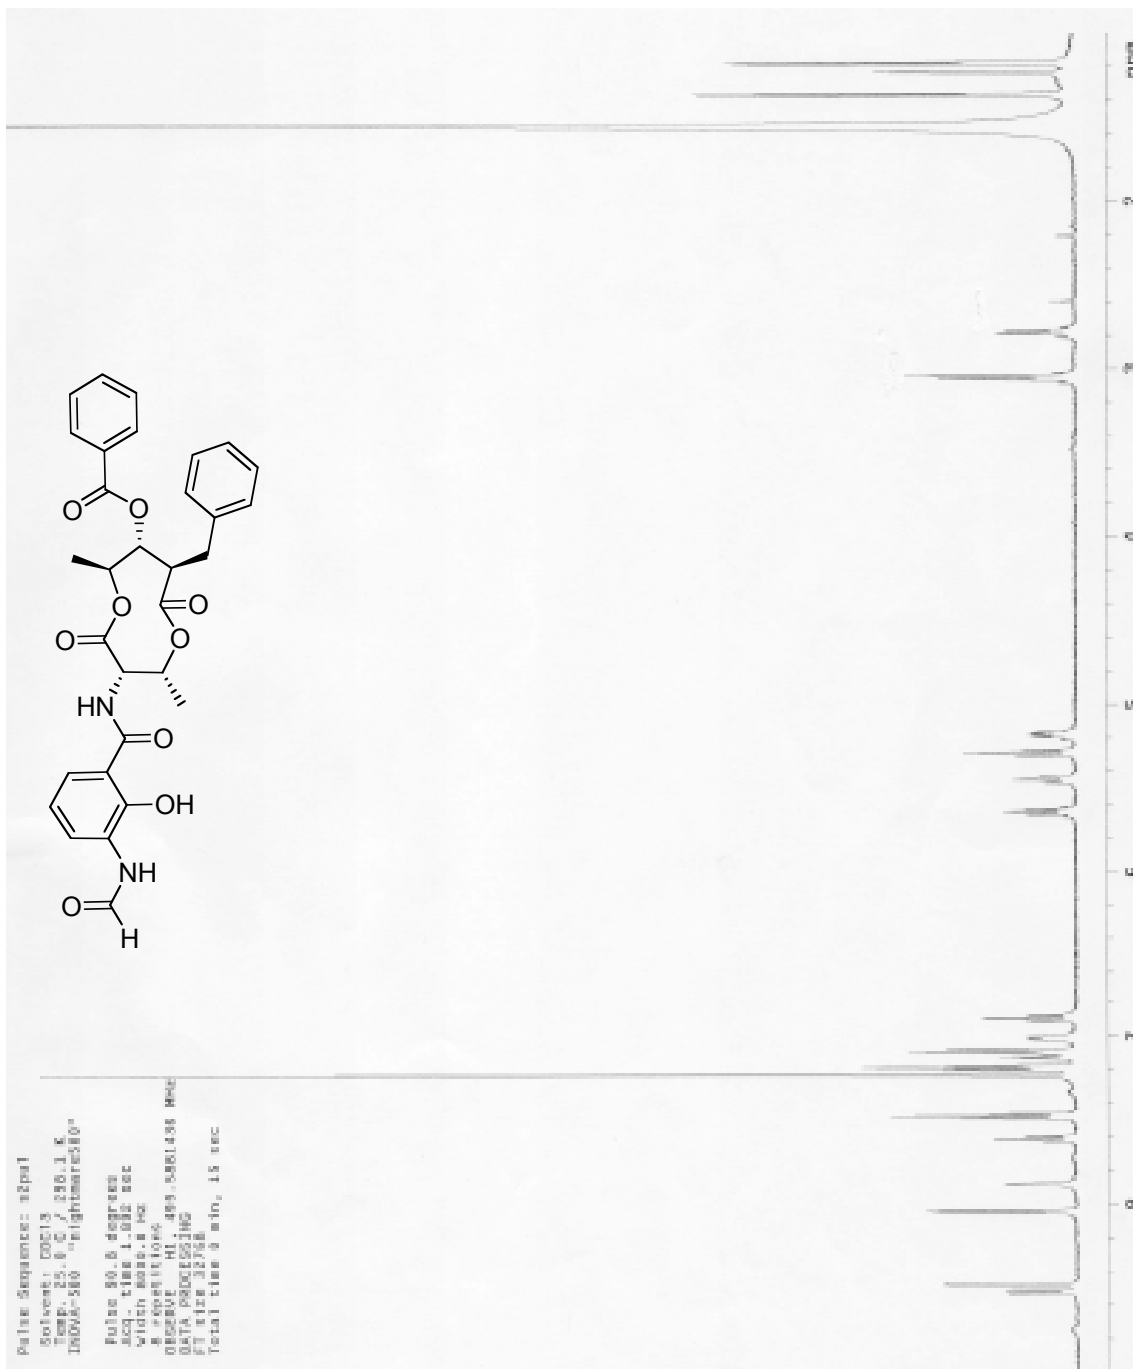



S62.  $^{13}\text{C}$  NMR Spectrum for Splenocin I (9) in  $\text{CDCl}_3$ .

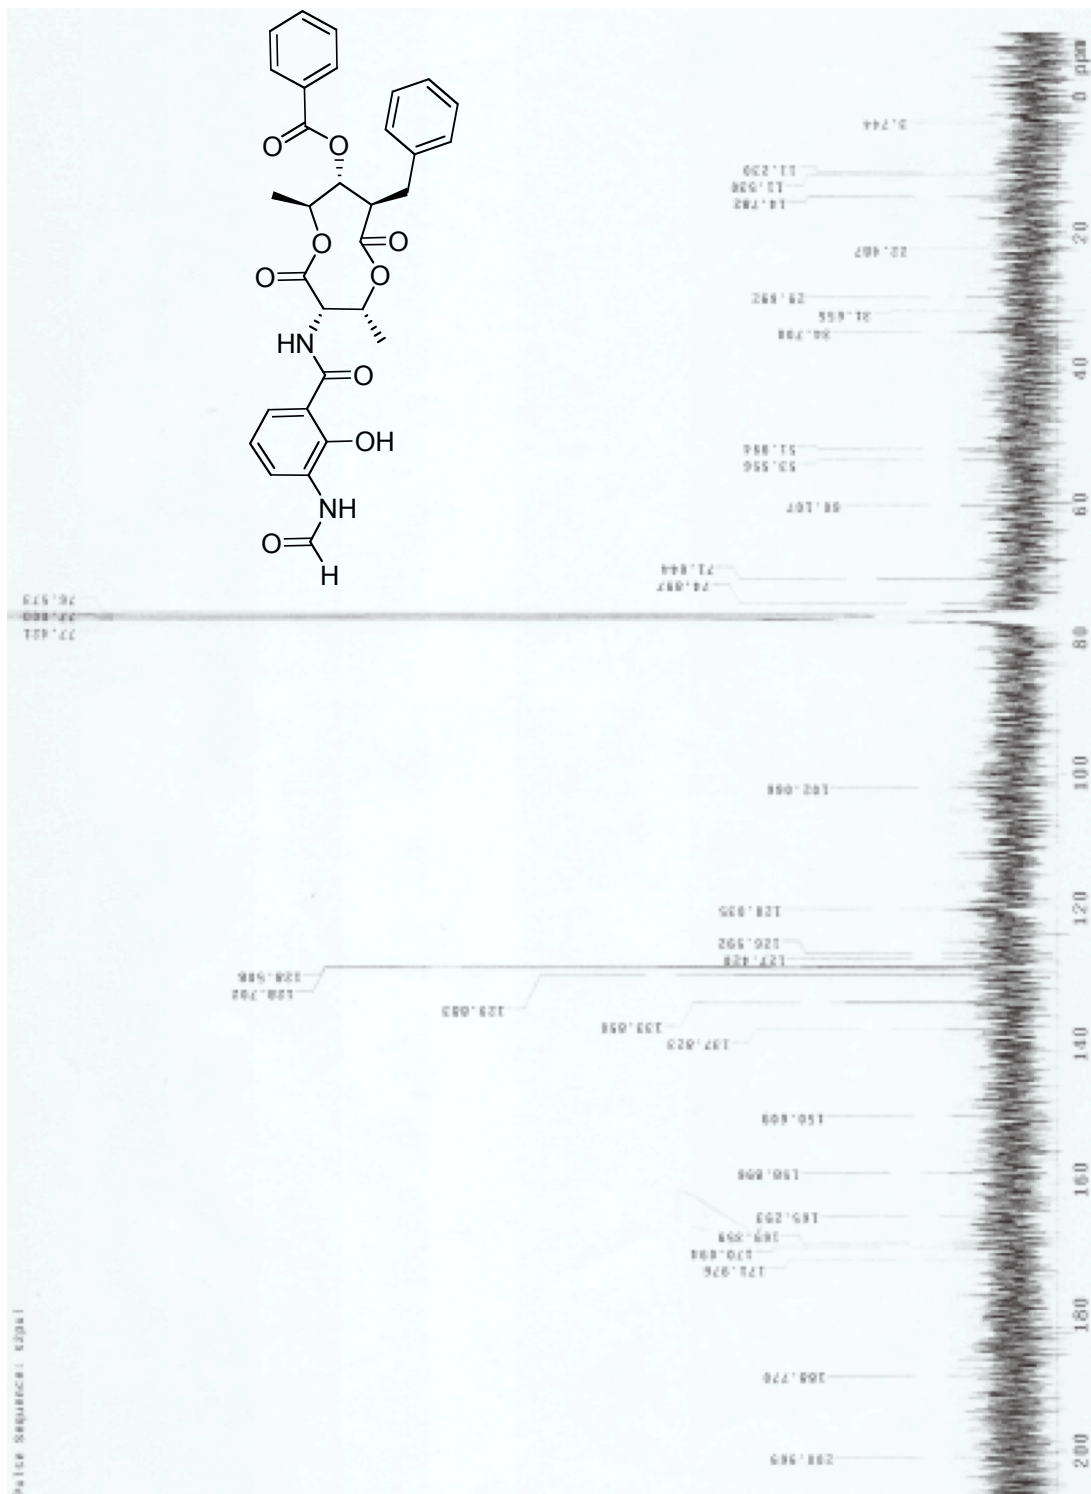

S63. gCOSY NMR Spectrum for Splenocin I (9) in CDCl<sub>3</sub>.

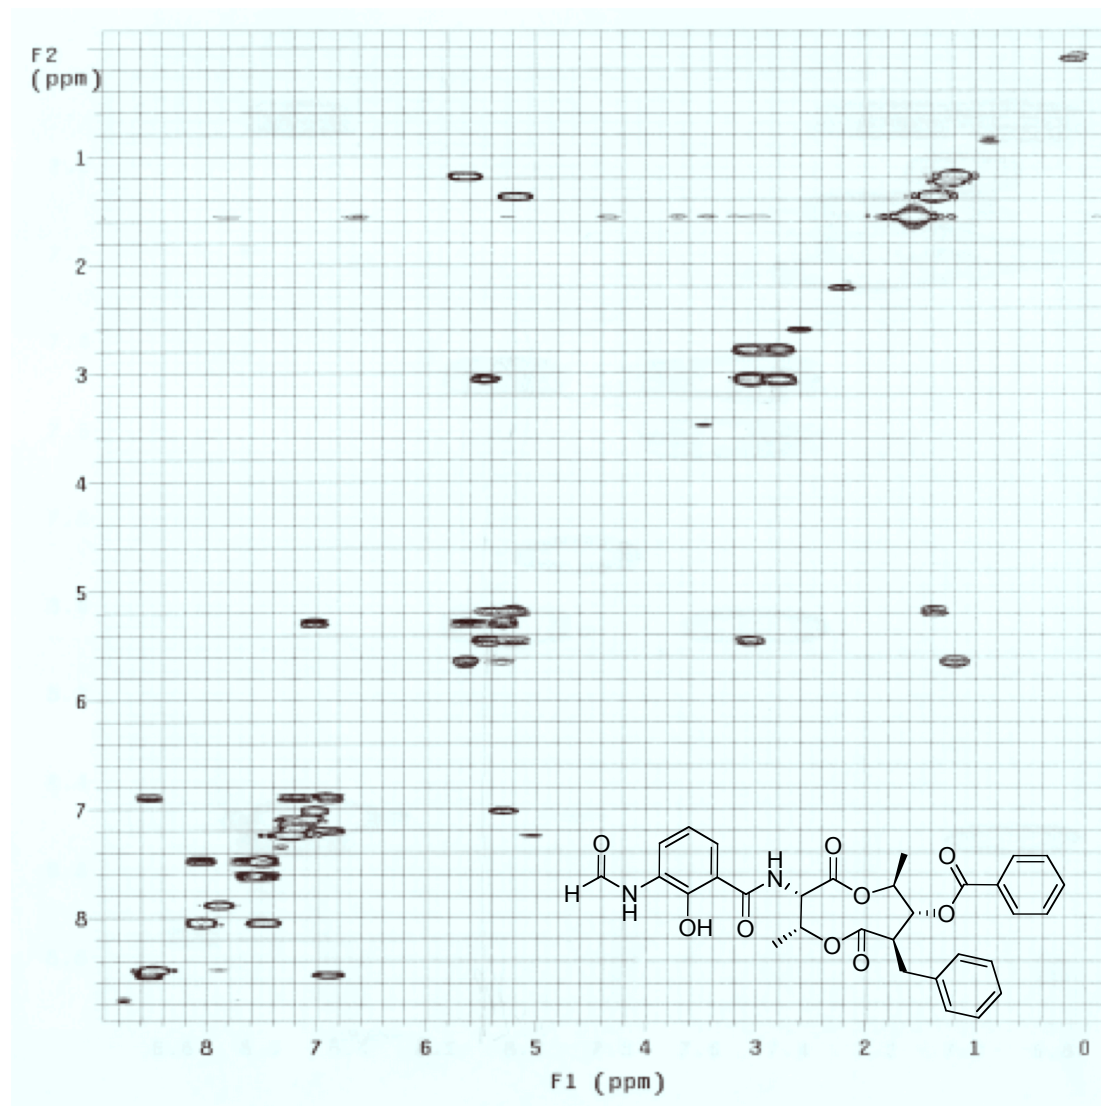

S64. gHSQC NMR Spectrum for Splenocin I (9) in CDCl<sub>3</sub>.

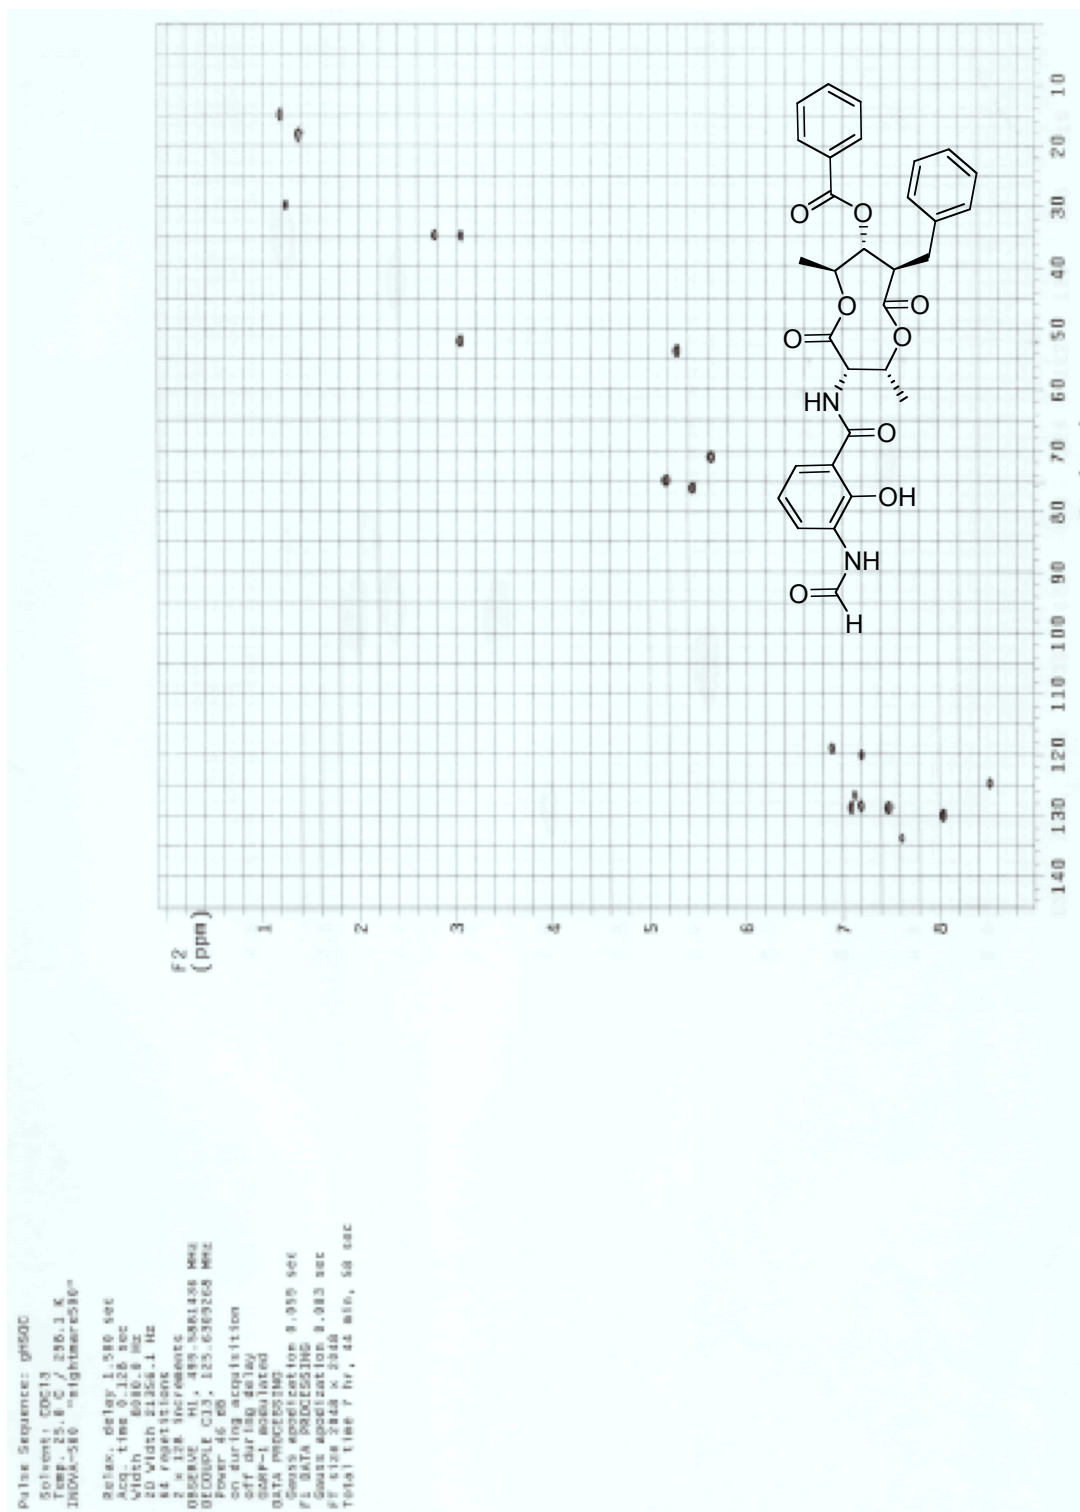

S65. gHMBC NMR Spectrum for Splenocin I (9) in CDCl<sub>3</sub>.

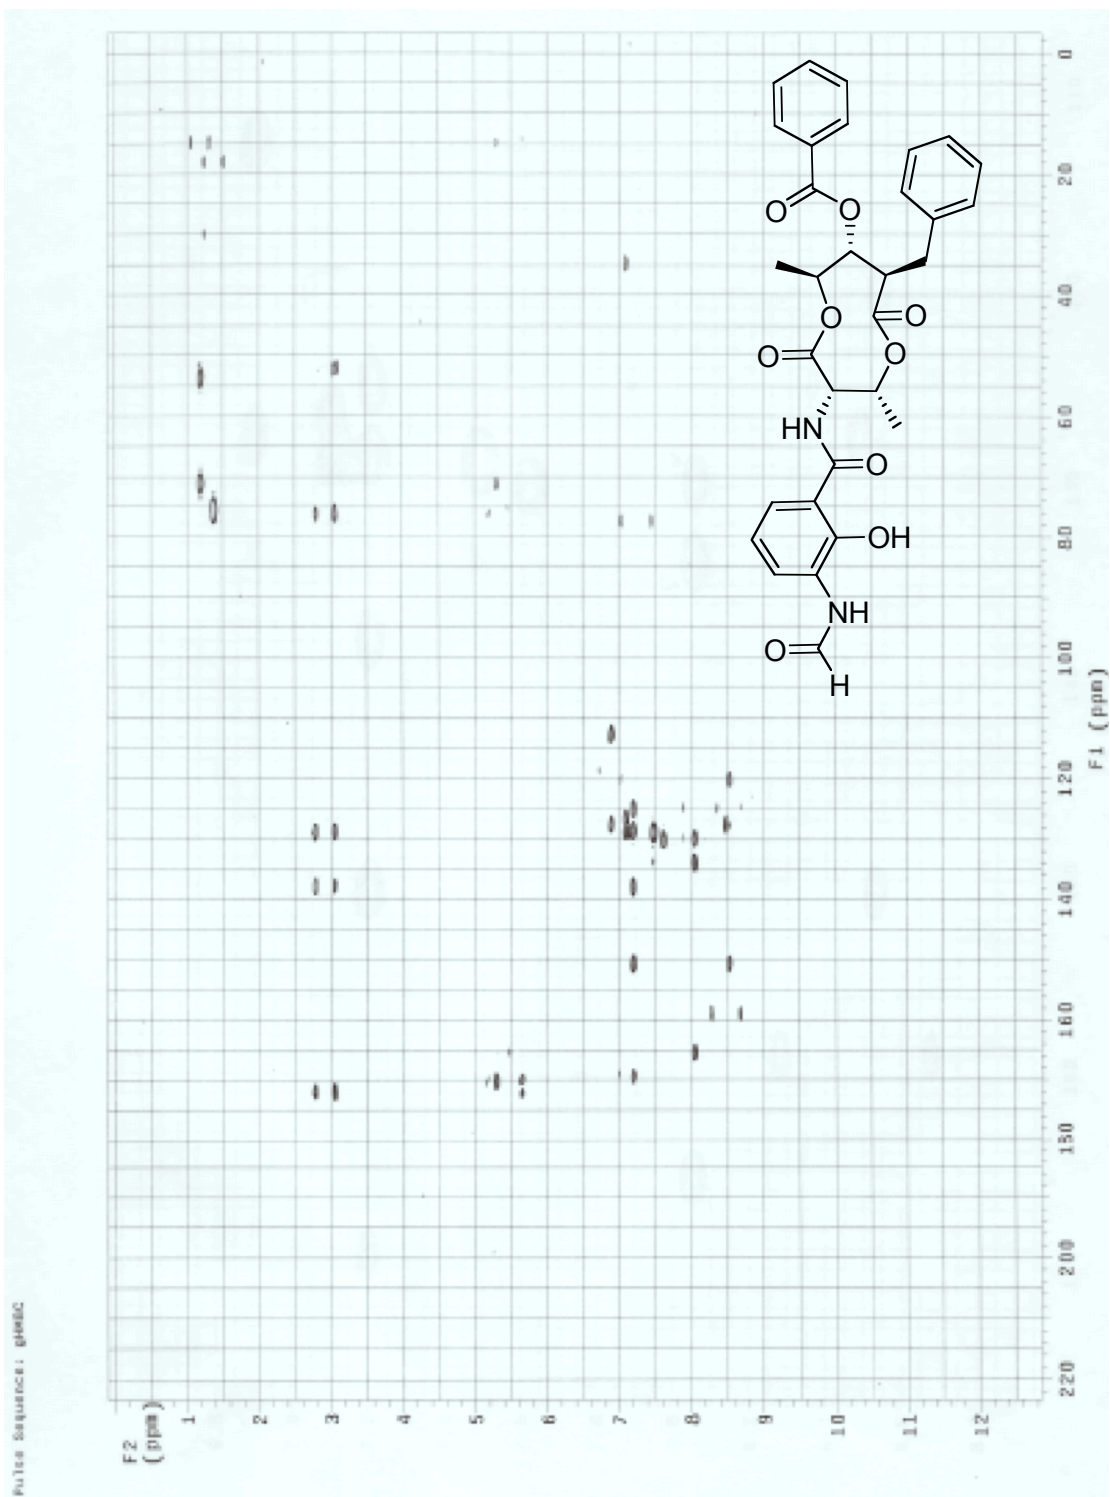

S66. UV Spectrum for Splenocin I (9) in MeCN.

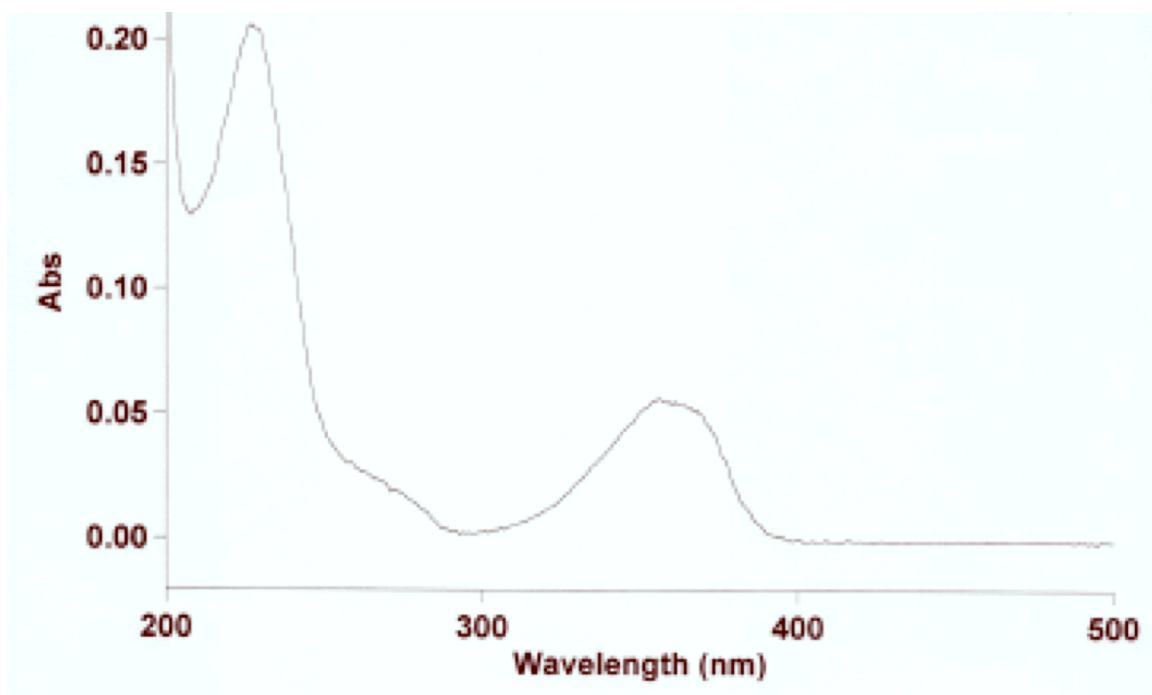

S67. LCMS Trace for Splenocin I (9).

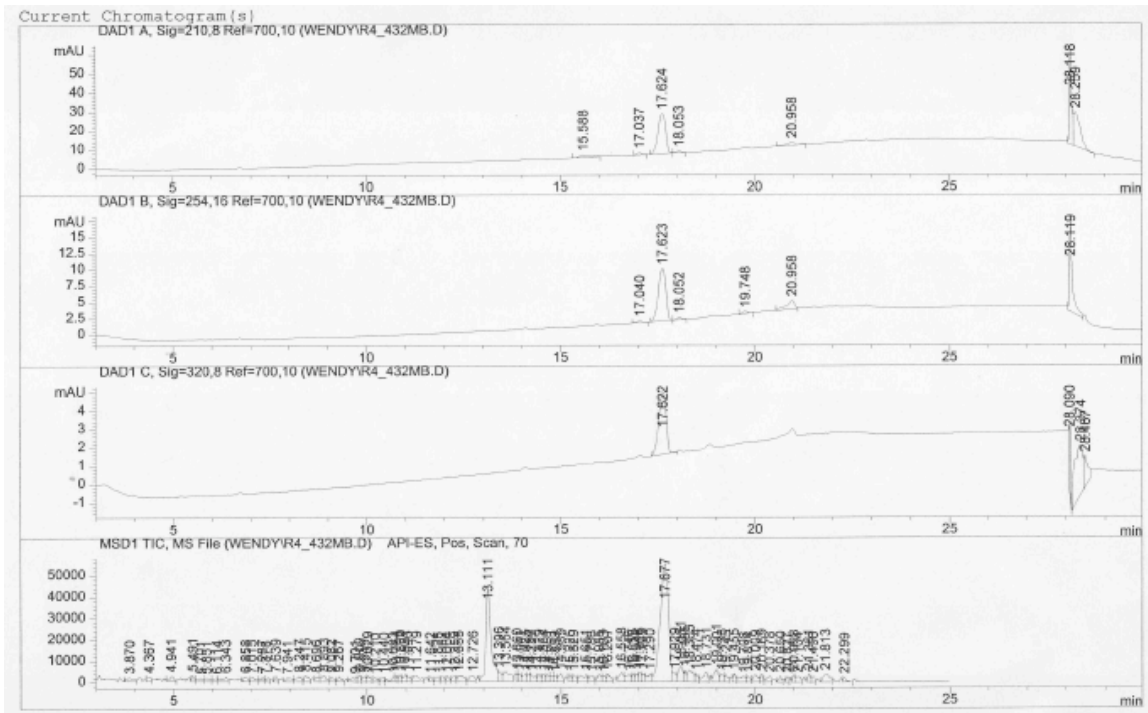

S68. HRMS for Splenocin I (9).

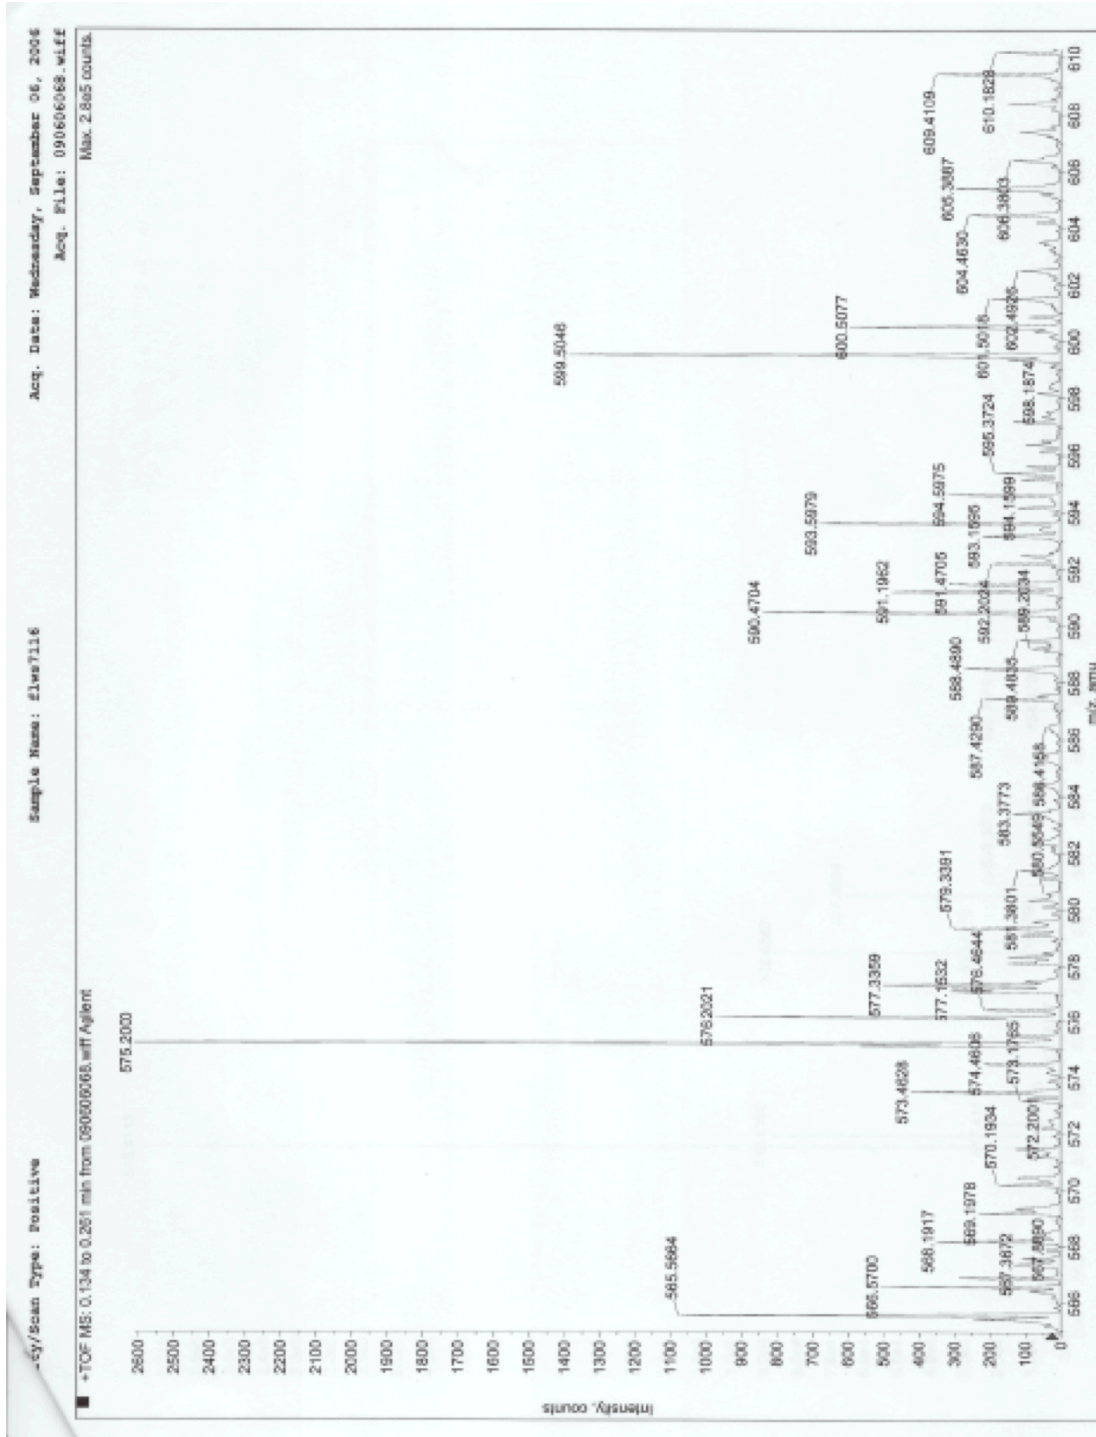

S69.  $^1\text{H}$  NMR Spectrum for Splenocin J (**10**) in  $\text{CDCl}_3$ .

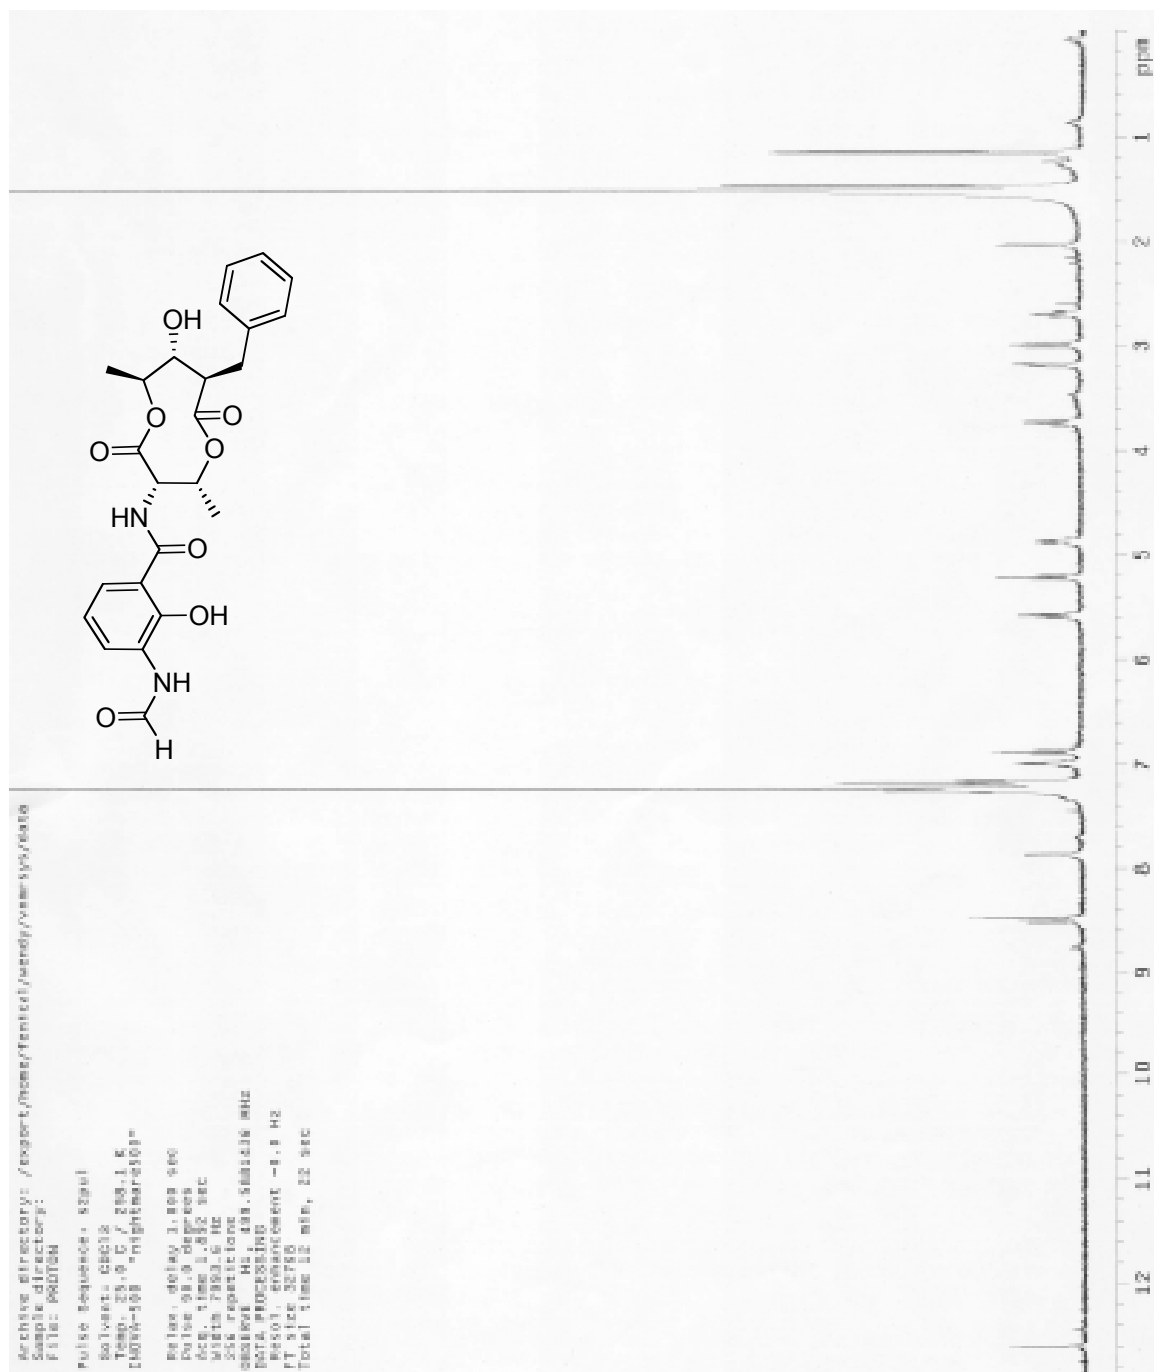



S70.  $^{13}\text{C}$  NMR Spectrum for Splenocin J (**10**) in  $\text{CDCl}_3$ .

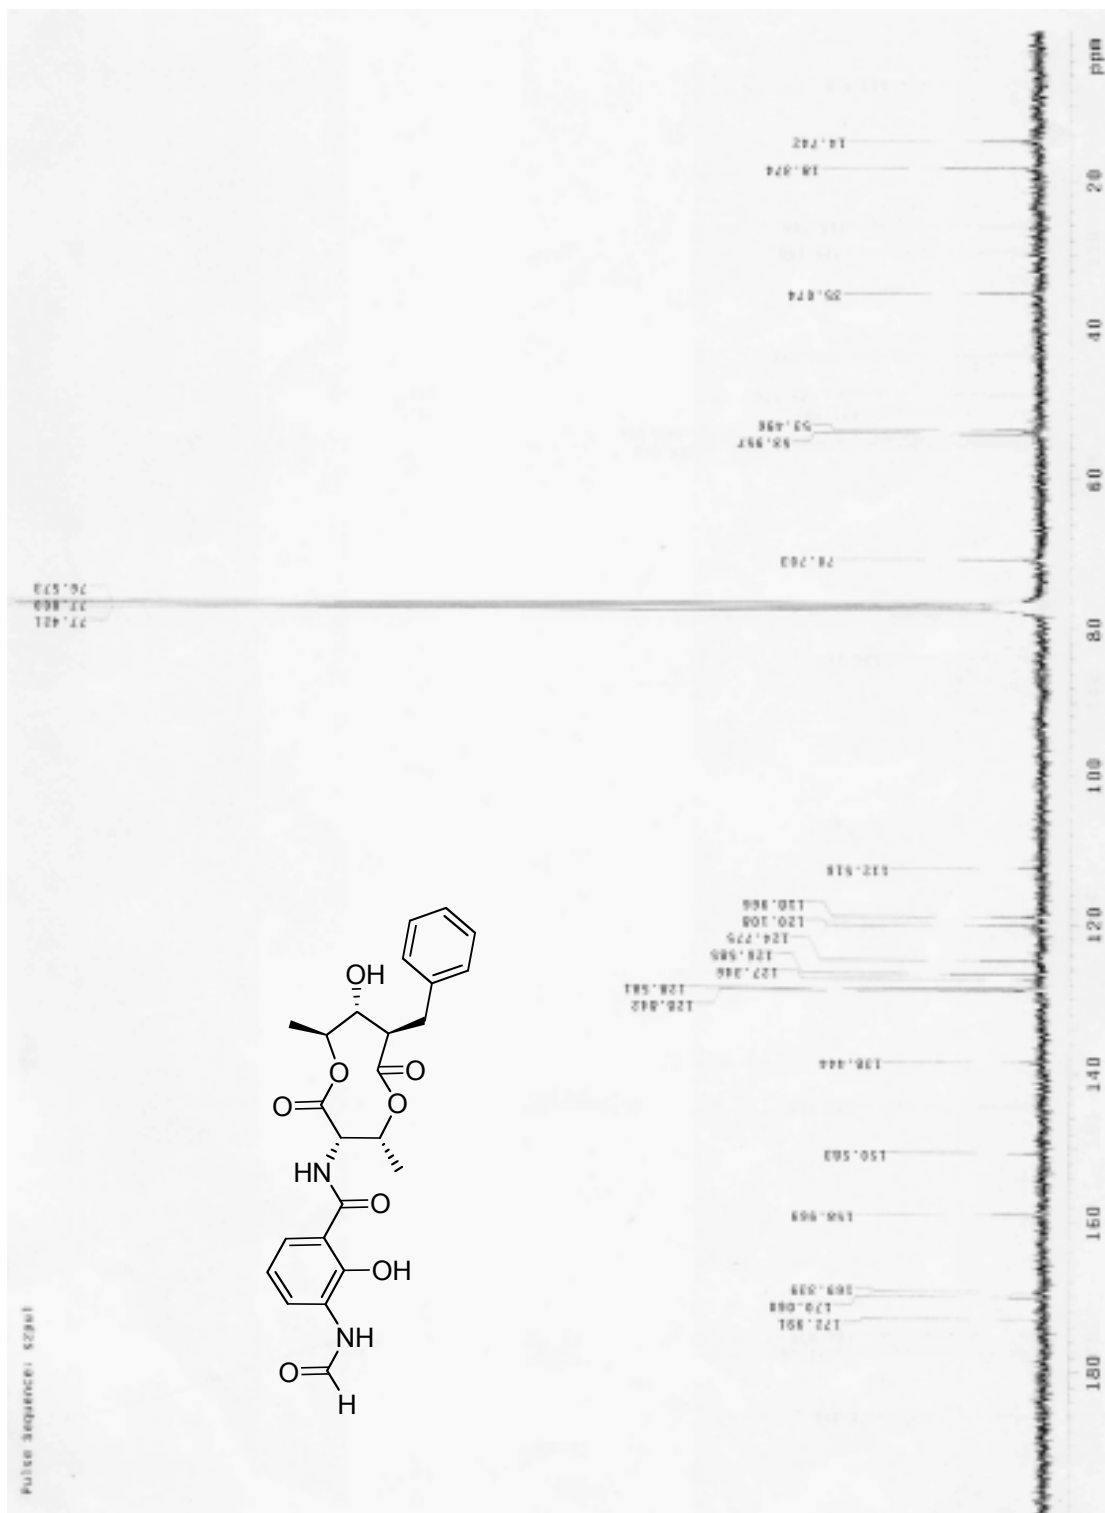

S71. gCOSY NMR Spectrum for Splenocin J (10) in CDCl<sub>3</sub>.

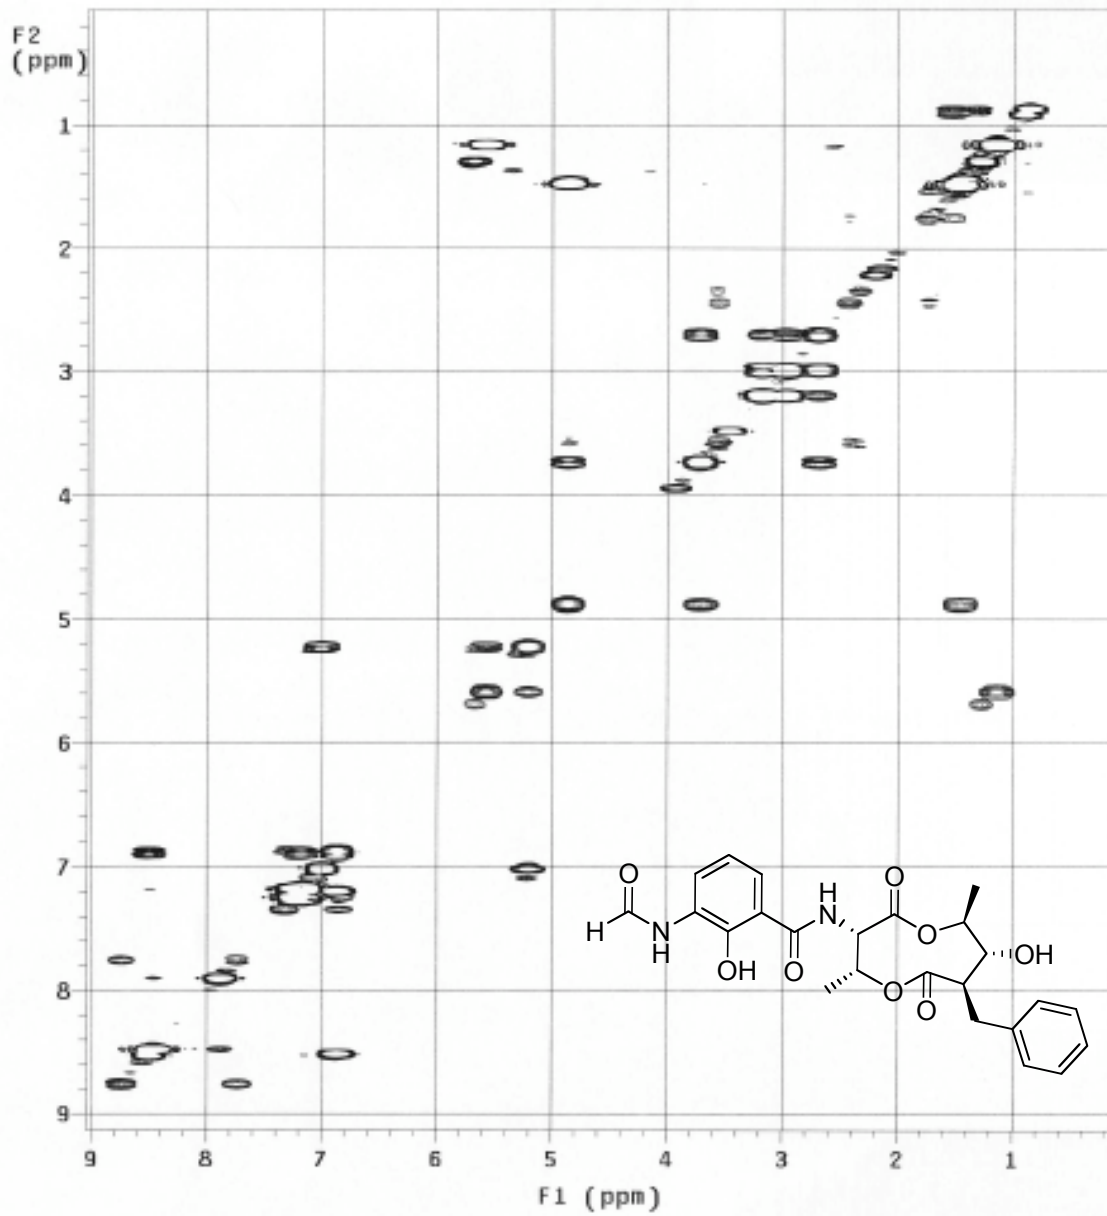

S72. NOESY NMR Spectrum for Splenocin J (**10**) in CDCl<sub>3</sub>.

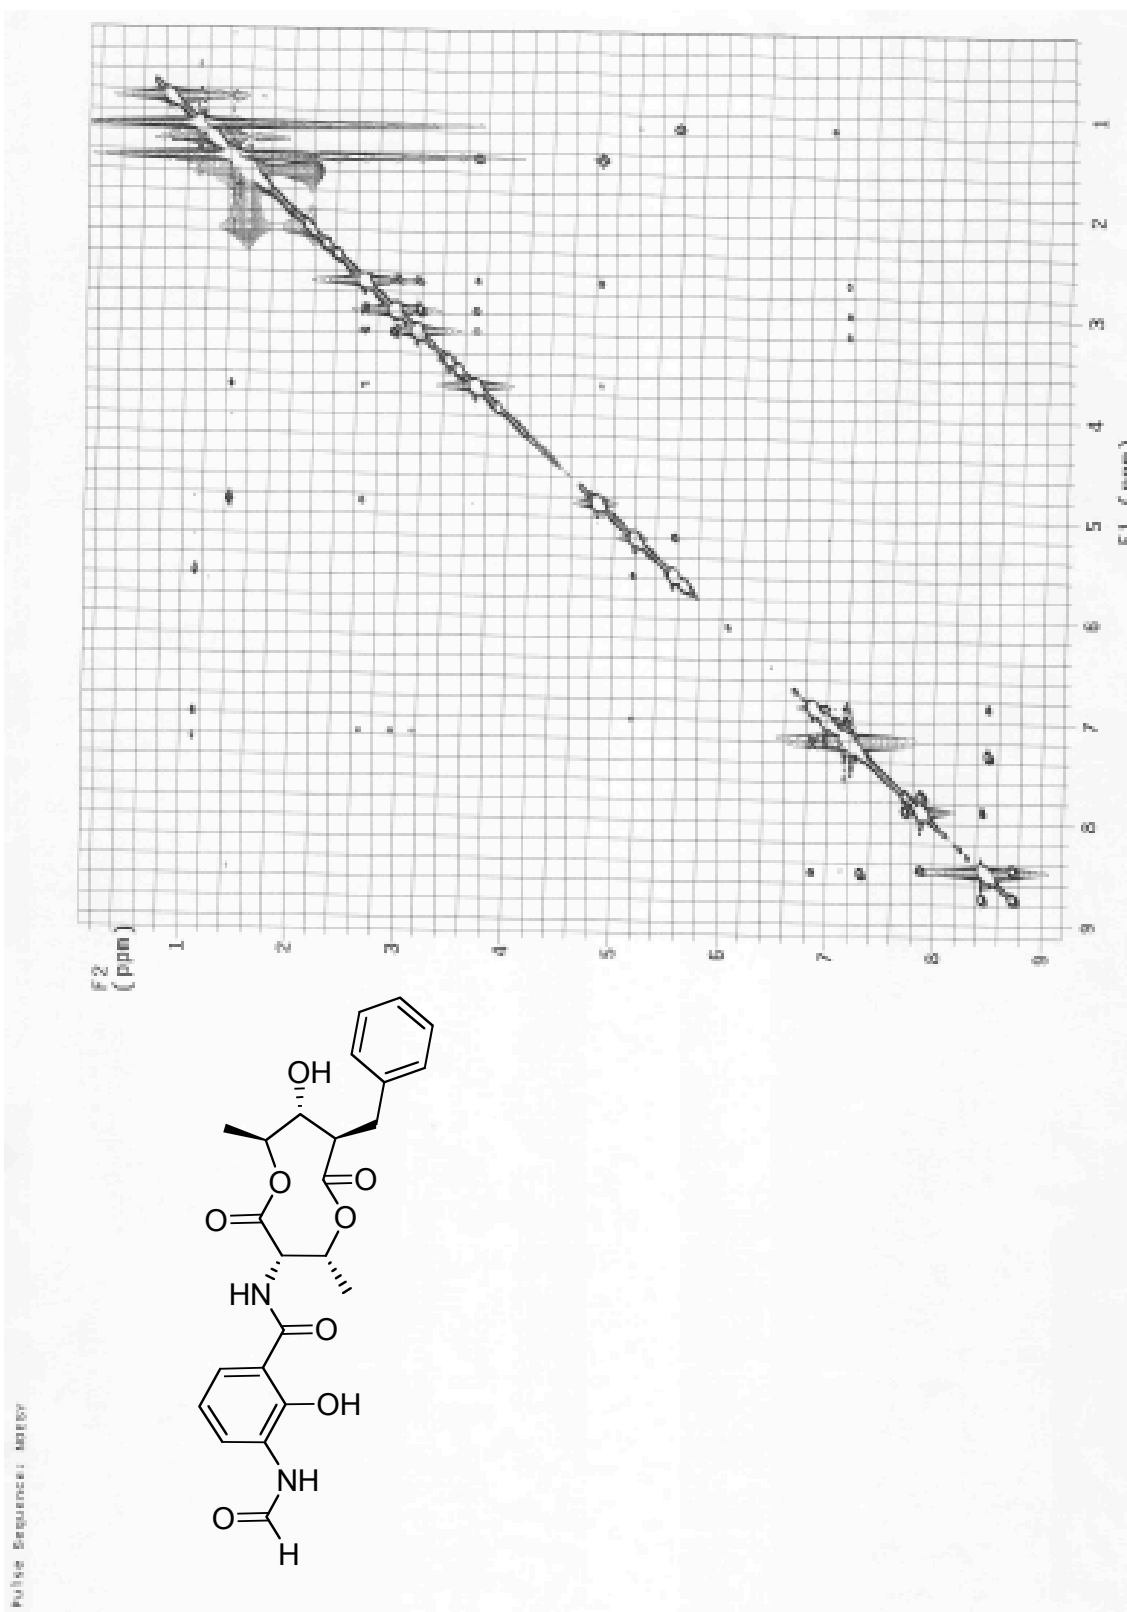

S73. gHSQC NMR Spectrum for Splenocin J (10) in CDCl<sub>3</sub>.

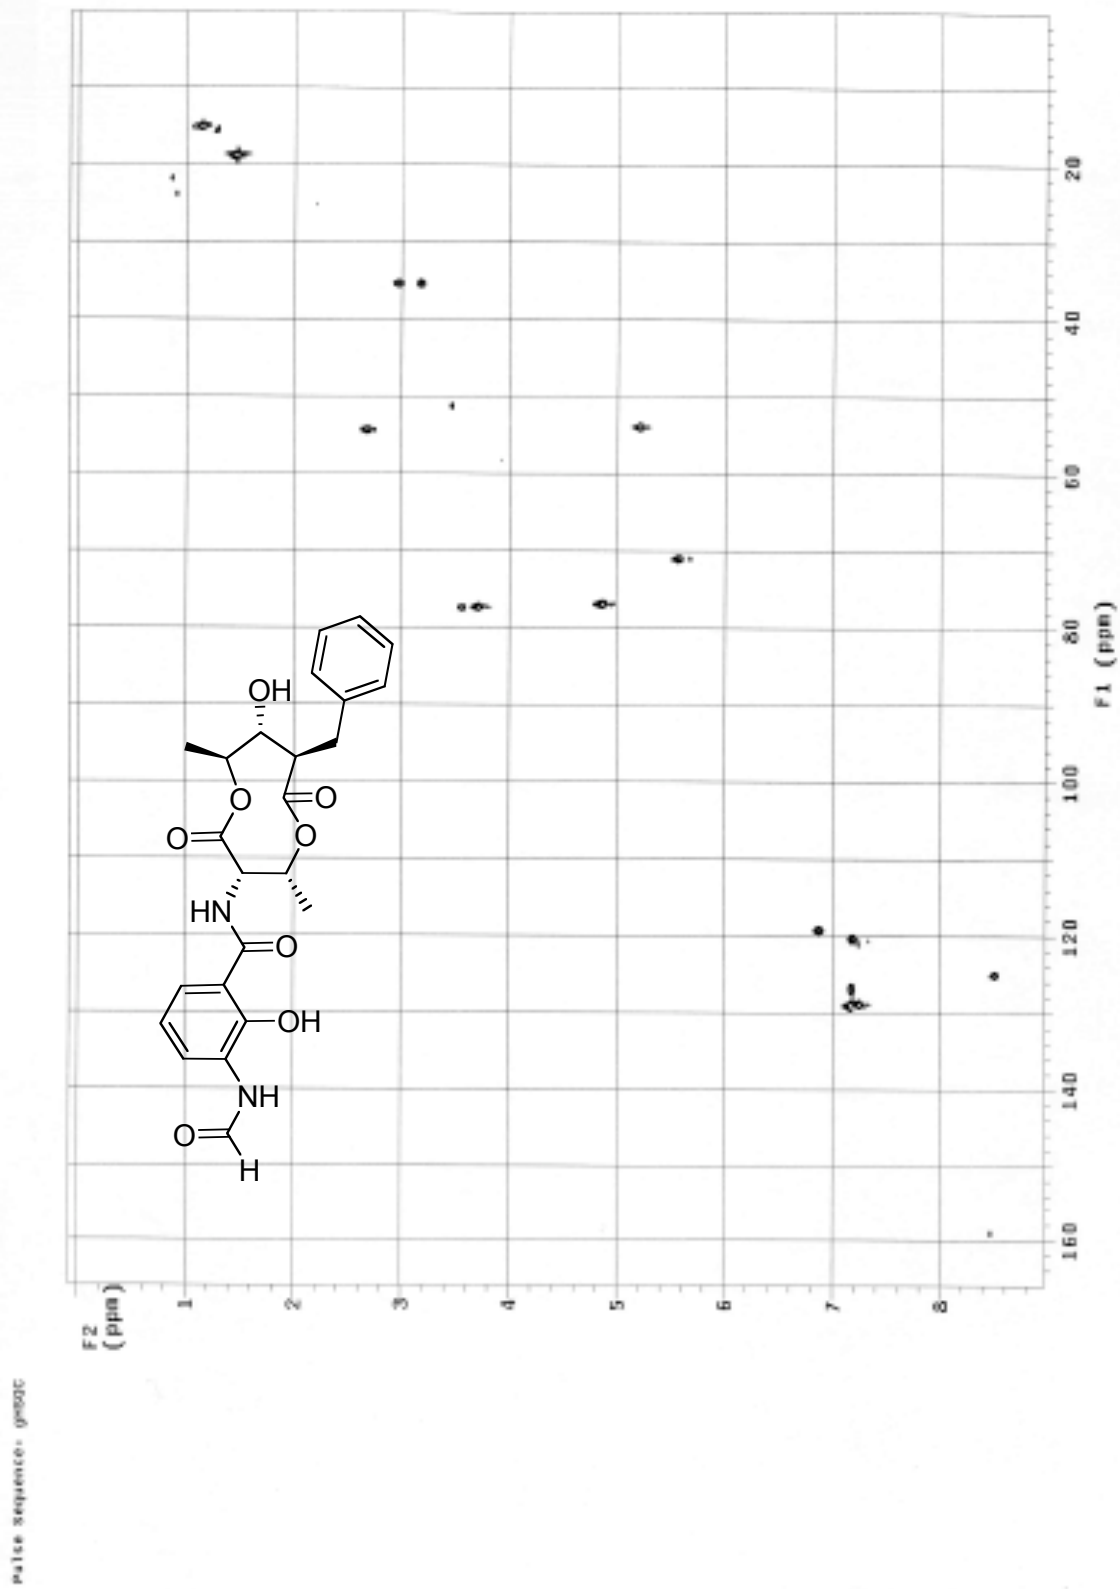

S74. gHMBC NMR Spectrum for Splenocin J (10) in CDCl<sub>3</sub>.

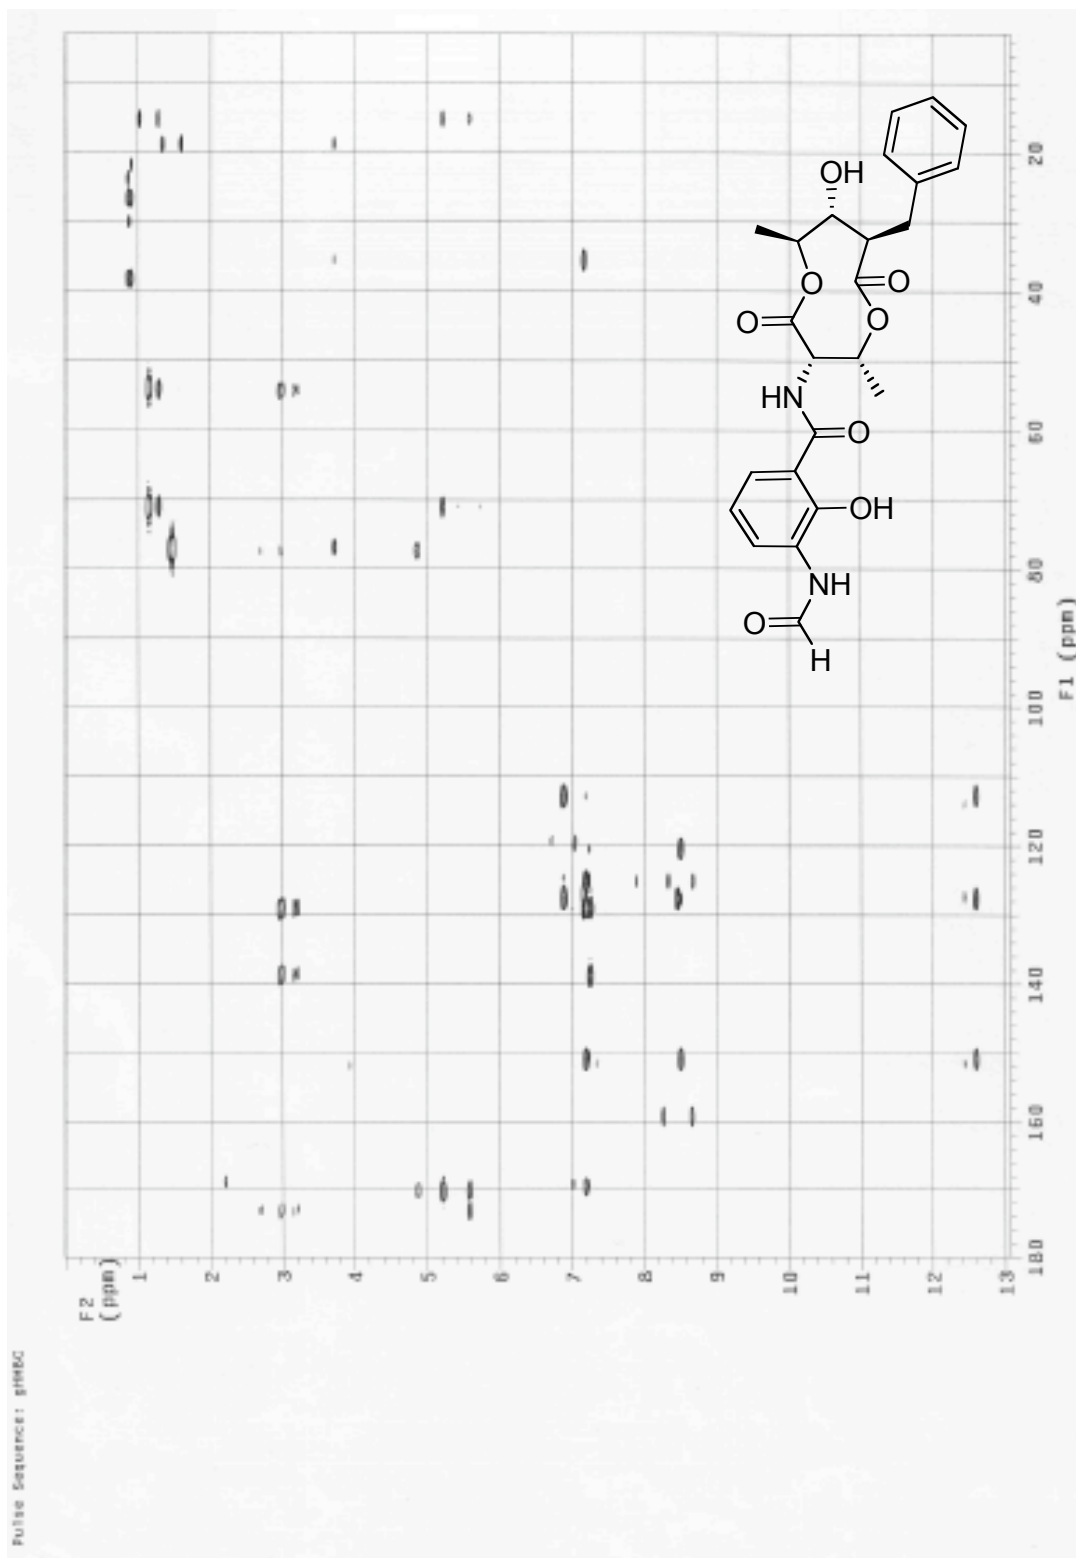

S75. IR spectrum for Splenocin J (10).

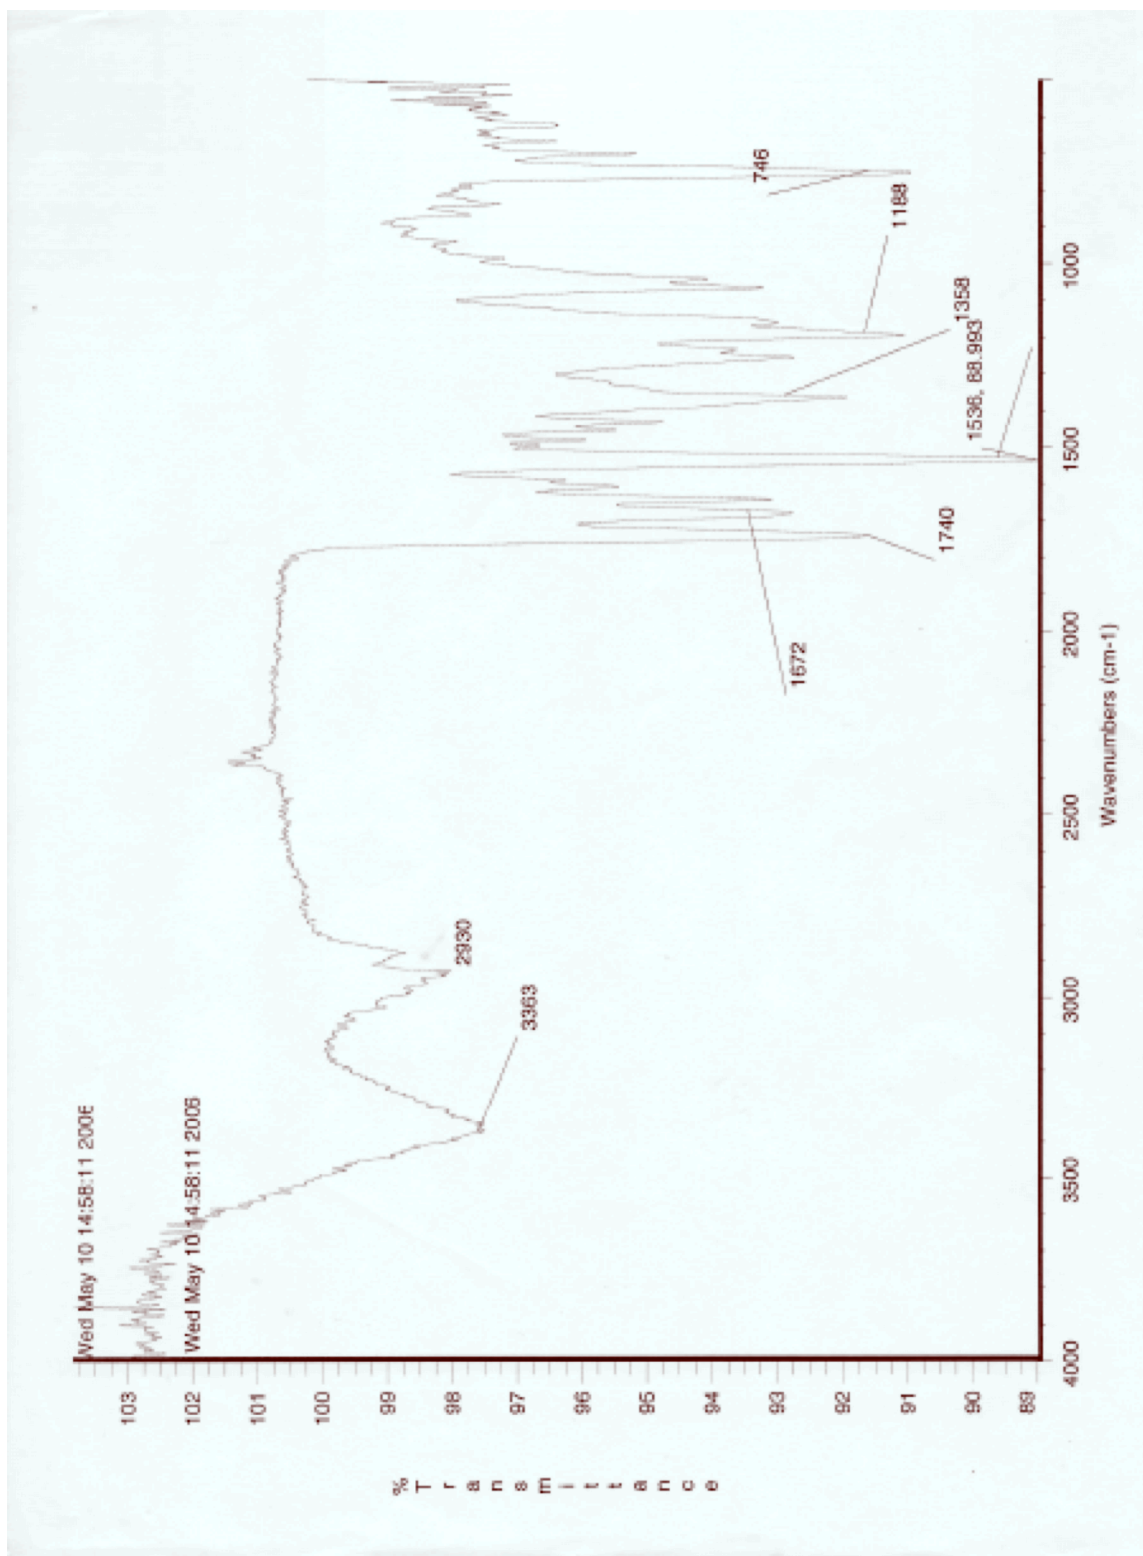

S76. UV Spectrum for Splenocin J (**10**) in MeOH.

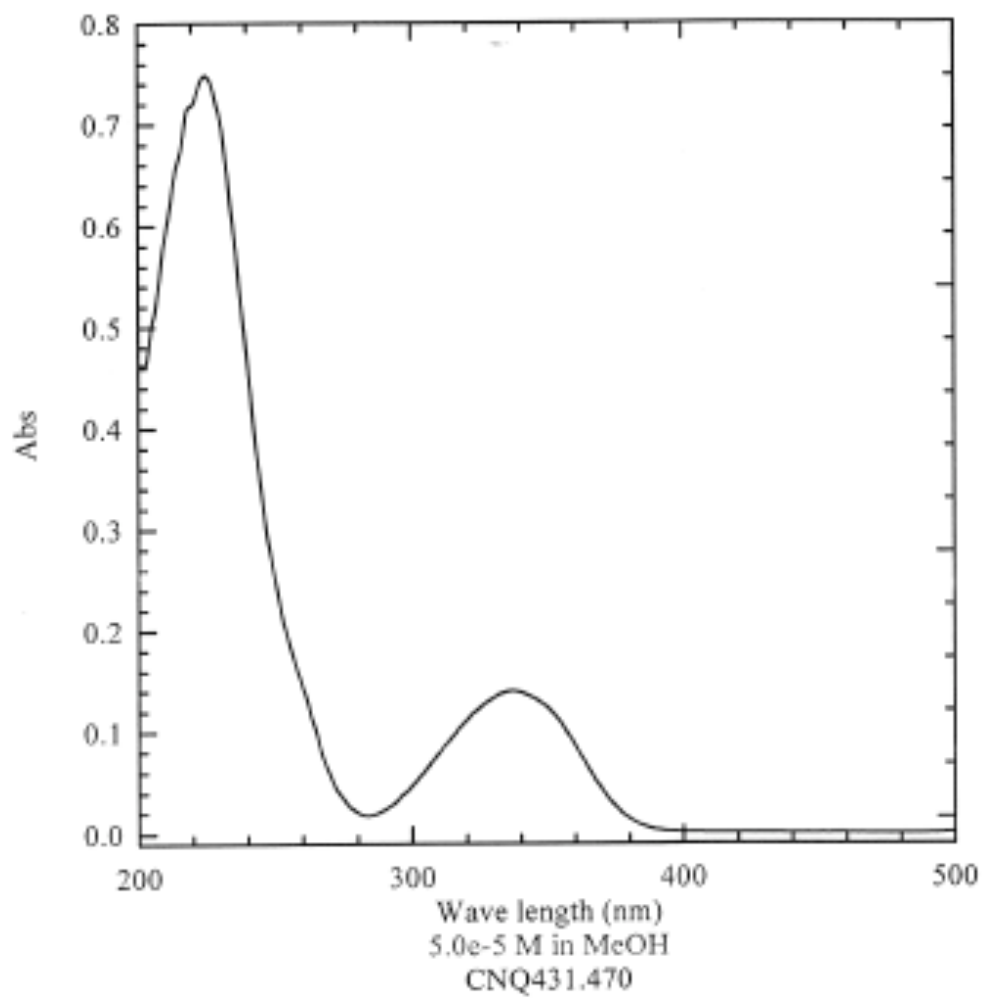

S77. LCMS Trace for Splenocin J (10).

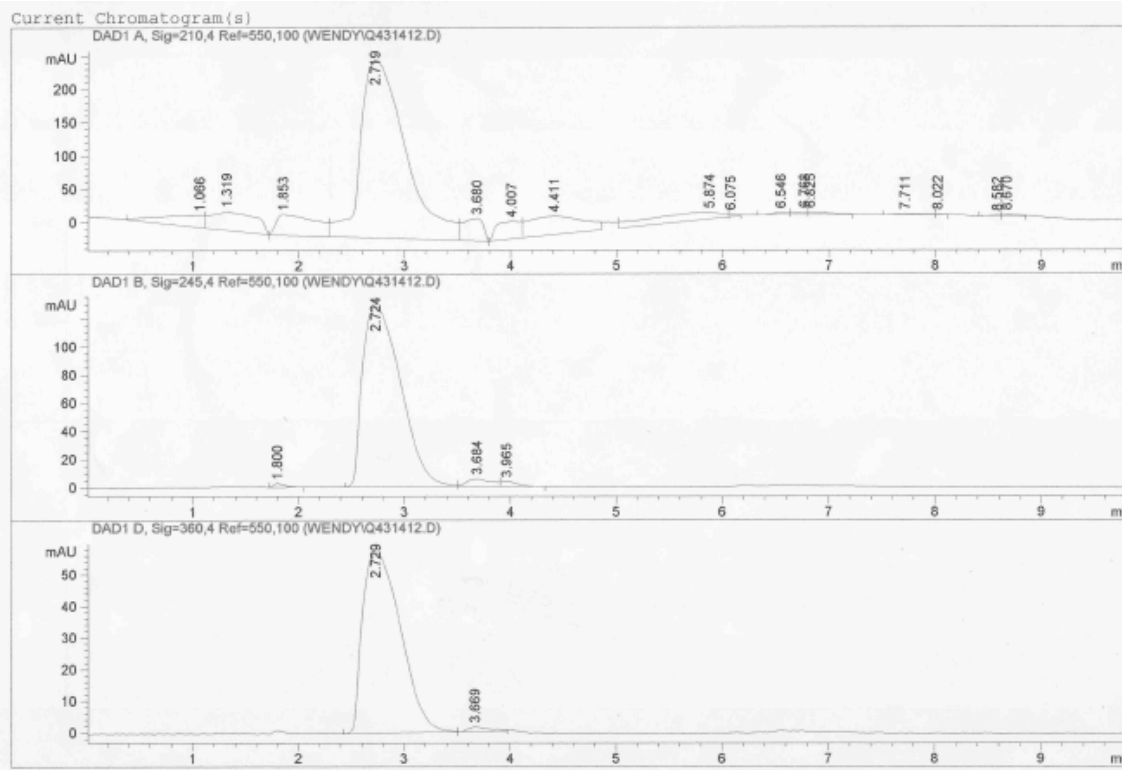



578. HRMS for Splenocin J (10).

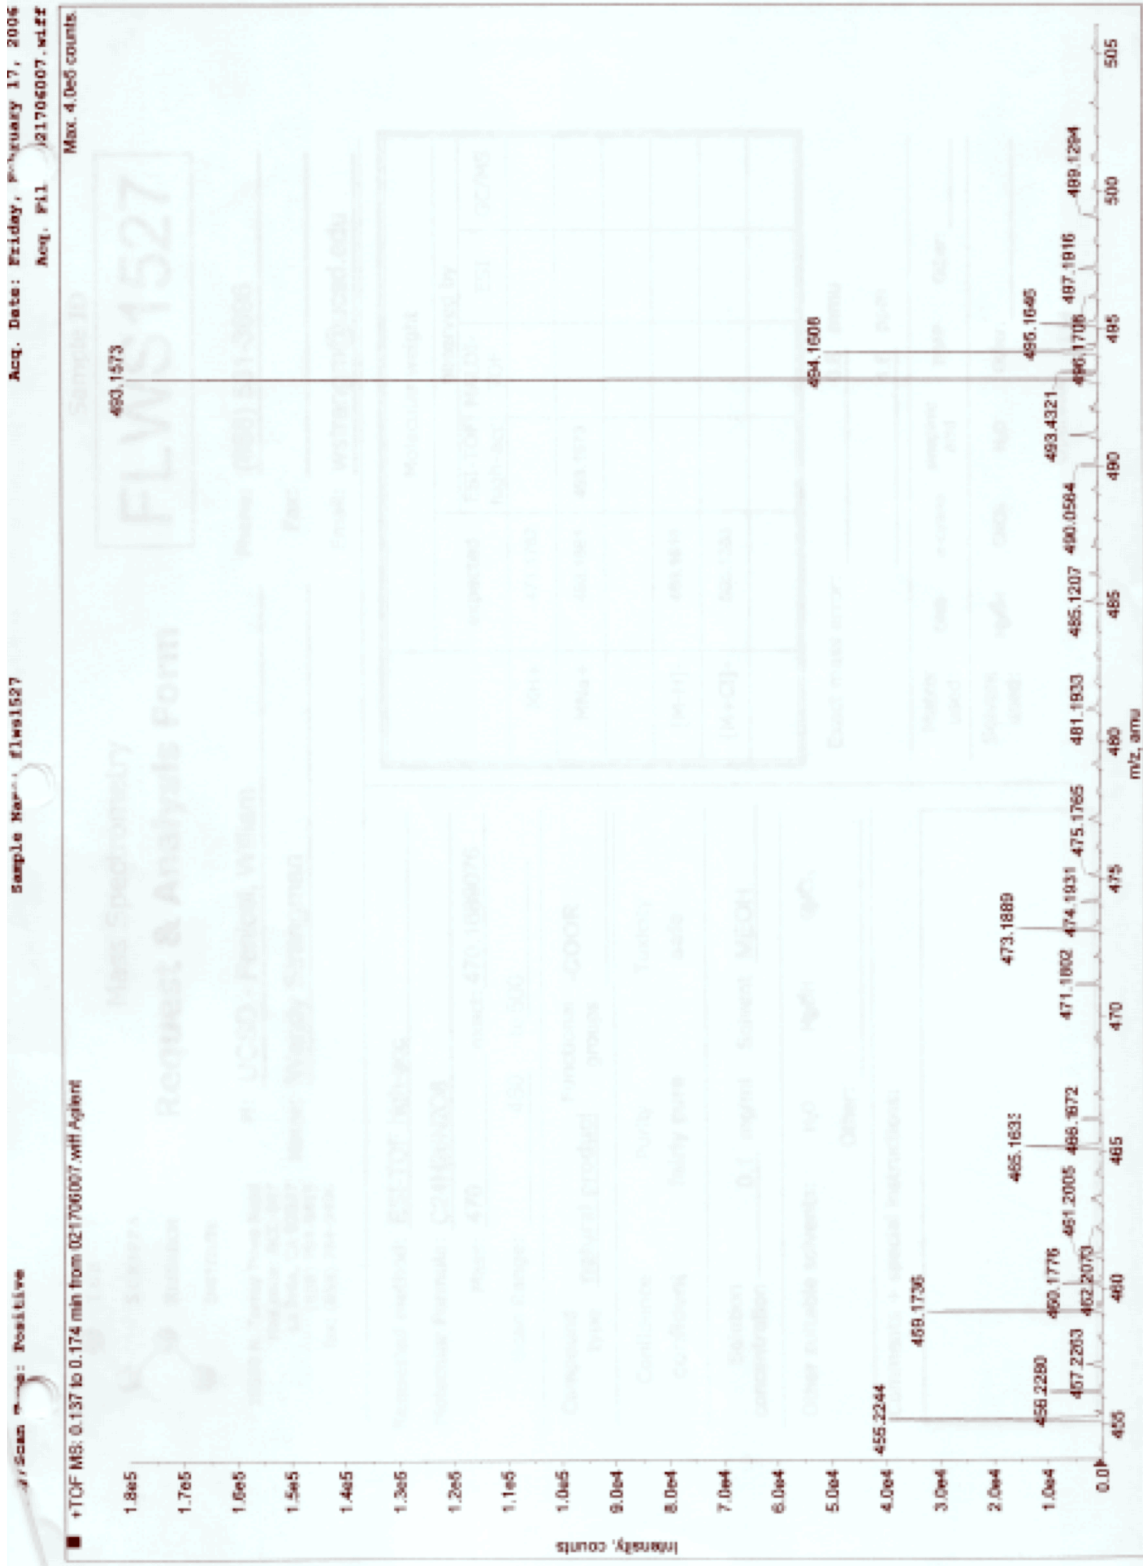

S79. <sup>1</sup>H NMR chemical shift data for Di-Mosher and Tri-Mosher products in CDCl<sub>3</sub>.

|         | <u>S-Mosher Ester</u>                 | <u>R-Mosher Ester</u>                 |                                  | <u>Sign</u> |
|---------|---------------------------------------|---------------------------------------|----------------------------------|-------------|
|         | $\delta_{\text{H}}$ ( <i>J</i> in Hz) | $\delta_{\text{H}}$ ( <i>J</i> in Hz) |                                  |             |
| H-1'' a | 3.006                                 | 3.006                                 | $\Delta$ (S-R) – Di-Mosher       | 0           |
| H-1'' b | 3.170                                 | 3.168                                 | $\Delta$ (S-R) – Di-Mosher       | +0.002      |
| H-7     | 2.677                                 | 2.669                                 | $\Delta$ (S-R) – Di-Mosher       | +0.008      |
| H-8     | 3.705                                 | 3.695                                 | $\Delta$ (S-R) – Di-Mosher       | +0.010      |
| H-9     | 4.800                                 | 4.776                                 | $\Delta$ (S-R) – Di-Mosher       | +0.024      |
| H-9 Me  | 1.461                                 | 1.449                                 | $\Delta$ (S-R) – Di-Mosher       | +0.012      |
|         |                                       |                                       |                                  |             |
| H-1'' a | 2.957                                 | 2.916                                 | $\Delta$ (S-R) – Tri-Mosher      | +0.041      |
| H-1'' b | 2.493                                 | 2.496                                 | $\Delta$ (S-R) – Tri-Mosher      | -0.003      |
| H-7     | 2.823                                 | 2.811                                 | $\Delta$ (S-R) – Tri-Mosher      | +0.012      |
| H-8     | 5.283                                 | 5.276                                 | $\Delta$ (S-R) – Tri-Mosher      | +0.007      |
| H-9     | 4.942                                 | 4.931                                 | $\Delta$ (S-R) – Tri-Mosher      | +0.011      |
| H-9 Me  | 1.220                                 | 1.227                                 | $\Delta$ (S-R) – Tri-Mosher      | -0.007      |
|         |                                       |                                       |                                  |             |
| H-1'' a |                                       |                                       | $\Delta$ (S-R) – (Tri–Di) Mosher | +0.041      |
| H-1'' b |                                       |                                       | $\Delta$ (S-R) – (Tri–Di) Mosher | -0.005      |
| H-7     |                                       |                                       | $\Delta$ (S-R) – (Tri–Di) Mosher | +0.004      |
| H-8     |                                       |                                       | $\Delta$ (S-R) – (Tri–Di) Mosher | +0.006      |
| H-9     |                                       |                                       | $\Delta$ (S-R) – (Tri–Di) Mosher | -0.013      |
| H-9 Me  |                                       |                                       | $\Delta$ (S-R) – (Tri–Di) Mosher | -0.019      |

S80. CD Spectra for Splenocins A-J (1-10) and 8-Hydroxy Antimycin in CH<sub>3</sub>CN.

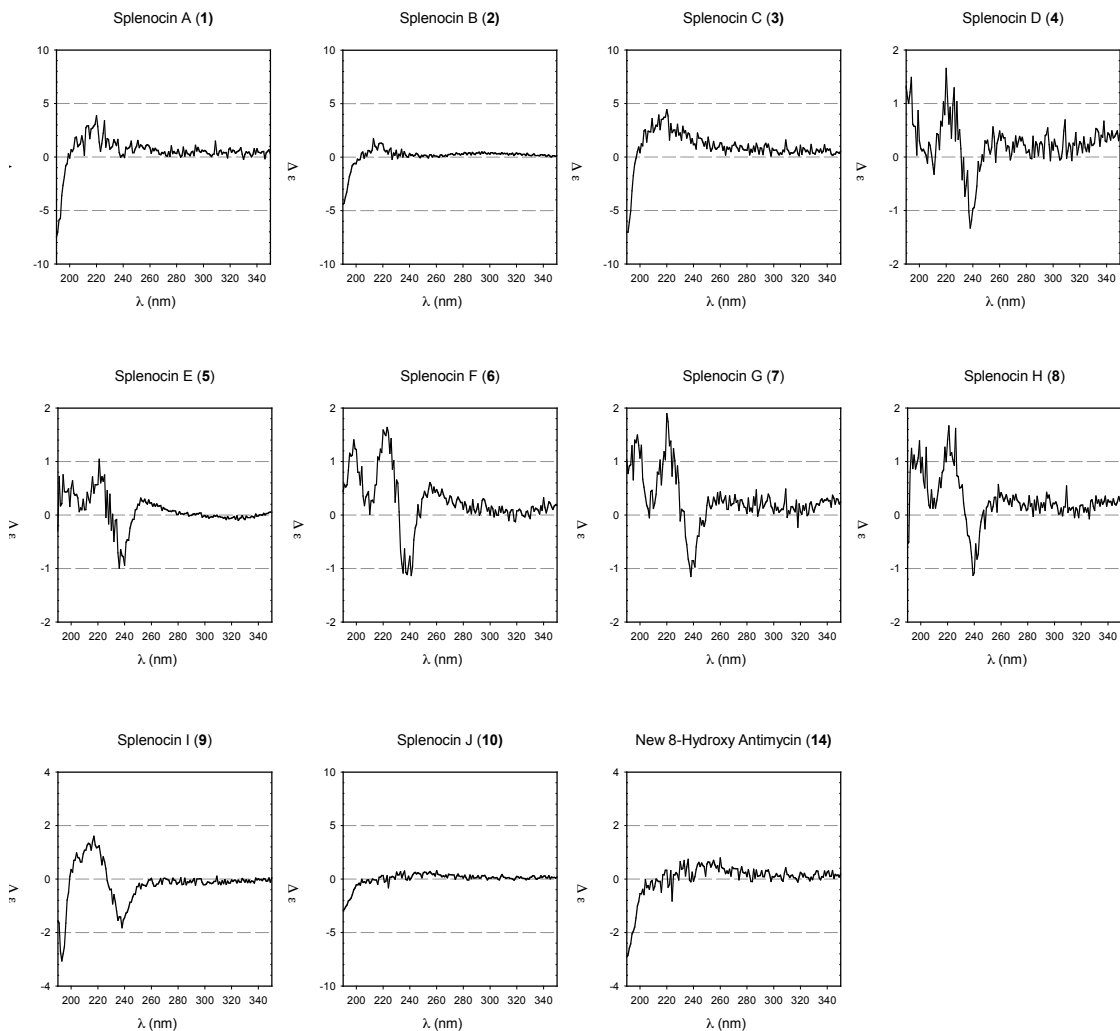

Supplement: NIHMS105965-supplement-1_si_001.pdf [file NIHMS105965-supplement-1_si_001.pdf]
